# Supplementary material for: Hf4+-exchanged montmorillonite-boosted Pd-catalyzed reductive aminolysis of aryl ethers to efficiently synthesize cyclohexylamines
Source: Royal Society of Chemistry journal article supplement (doi:10.1039/d2gc04130h), 2023-01-01
Supplement: d2gc04130h1.pdf [file d2gc04130h1.pdf]

Supporting Information for:

## **Hf<sup>4+</sup>-exchanged montmorillonite-boosted Pd-catalyzed reductive aminolysis of aryl ethers to efficiently synthesize cyclohexylamines**

*Jiao Xu,<sup>a,c</sup> Bingxiao Zheng,<sup>a,c</sup> Jinliang Song,<sup>\*b</sup> Haihong Wu,<sup>\*a,c</sup> Xuelei Mei,<sup>a,c</sup> Kaili Zhang,<sup>a,c</sup> Wanying Han,<sup>a,c</sup> Chunyu Li,<sup>a,c</sup> Mingyuan He,<sup>a,c</sup> and Buxing Han<sup>\*a,c,d,e</sup>*

<sup>a</sup> *Shanghai Key Laboratory of Green Chemistry and Chemical Processes, School of Chemistry and Molecular Engineering, East China Normal University, Shanghai 200062, China. E-mail: hhwu@chem.ecnu.edu.cn; hanbx@iccas.ac.cn*

<sup>b</sup> *School of Chemical Engineering and Light Industry, Guangdong University of Technology, Guangzhou 510006, China. E-mail: songjl\_2021@gdut.edu.cn*

<sup>c</sup> *Institute of Eco-Chongming, Shanghai 202162, China.*

<sup>d</sup> *Beijing National Laboratory for Molecular Sciences, CAS Key Laboratory of Colloid, Interface and Chemical Thermodynamics, CAS Research/Education Center for Excellence in Molecular Sciences, Institute of Chemistry, Chinese Academy of Sciences, Beijing 100190, China.*

<sup>e</sup> *School of Chemistry and Chemical Engineering, University of Chinese Academy of Sciences, Beijing 100049, China.*

*E-mails: hhwu@chem.ecnu.edu.cn; hanbx@iccas.ac.cn*

### **Table of Contents**

|                                                          |     |
|----------------------------------------------------------|-----|
| 1. Experimental Section. ....                            | S2  |
| 2. <sup>1</sup> H NMR and <sup>13</sup> C NMR Data. .... | S13 |
| 3. HR-MS Data. ....                                      | S39 |
| 4. Chromatograms of GC measurements. ....                | S56 |
| 5. References. ....                                      | S69 |

## Experimental Procedures

**Chemicals and materials.** Unless otherwise stated, all chemicals in this work were commercially available and used without further purification. Na<sup>+</sup>-MMT was purchased from Zhejiang Sanding Co., Ltd. Hafnium dichloride oxide octahydrate (98%), and cyclooctylamine (>97%) were purchased from ALFA. Benzyl phenyl ether (98%), dodecylamine (97%), cyclohexylamine (99%), cycloheptylamine (99%), n-dodecane (99.5%), phenol (99.5%), cyclopentylamine (99%), and cyclohexanone (99.8%) were provided by TCI. Palladium on carbon (Pd/C, Pd wt% 10%, reduced, anhydrous), palladium (II) acetate (99%, Pd wt% 46.0-48.0%), *p*-xylene (99%), benzylamine (99%), butylamine (99%), 3-phenylpropylamine (98%), n-heptylamine (98%), and n-octylamine (98%) were obtained from INNOCHEM. Amylamine (99%), hexylamine (99%), and phenethoxybenzene (98%) were purchased from ALADDIN. 4-Phenylbutan-2-amine (>97%) was purchased from ACCELA. Ethanol (99.9%) was obtained from Sinopharm. The compounds of 1b-1k were synthesized according to the literatures.<sup>S1,S2</sup>

**Synthesis of Pd/Hf-MMT.** The Pd/Hf-MMT catalyst was prepared based on the procedures reported previously. Typically, 1.5 g of Na<sup>+</sup>-MMT was dispersed in 50 mL of aqueous solution of HfOCl<sub>2</sub> (1.5 g) under sonication to form a stable suspension and stirred at 90 °C for 24 h. Subsequently, the treated MMT was separated via centrifugation, washed with distilled water several times to remove the unabsorbed HfOCl<sub>2</sub>, and finally washed with ethanol. Then, this slurry was dried at 60 °C in vacuum overnight and ground to powder, which was denoted as Hf-MMT. The resultant Hf-MMT was dispersed in the Pd(OAc)<sub>2</sub> ethanol solution and stirred at room temperature for 12 h. The slurry was centrifuged and washed with distilled water three times, which was then dried at 60 °C in vacuum overnight, followed by reduction using hydrogen (5 °C/min) at 300 °C for 6 h, resulting in brown-yellow Pd/Hf-MMT powder. The loading content of Pd in Pd/Hf-MMT was 2 wt% as determined by ICP-AES. For comparison, Pd/MMT was prepared via dispersing MMT in the Pd(OAc)<sub>2</sub> ethanol solution to adsorb Pd<sup>2+</sup> onto the MMT support, followed by hydrogen reduction at 300 °C for 6 h.

**Reductive aminolysis of aryl ethers.** In a typical experiment, aryl ether (0.5 mmol), amine (1 mmol), Pd/Hf-MMT (1 mol% Pd metal based on aryl ether), and *p*-xylene (2 mL) were added into a stainless-steel reactor of 15 mL with a Teflon coating. After the air in the autoclave was replaced by hydrogen (three times), the autoclave was pressurized to the desired pressure with H<sub>2</sub>. Then, the autoclave was placed into a constant-temperature air bath and heated to the desired temperature, and the reactions were conducted with a stirring rate of 800 rpm for the desired reaction time. After the reaction was completed, the products were analyzed quantitatively using *n*-dodecane as the internal standard by gas chromatography (GC) and gas chromatography coupled with mass spectroscopy (GC-MS). In addition, to ensure the reliability of the obtained results, each experiment was repeated three times under the same reaction conditions.

**Recyclability of Pd/Hf-MMT.** To test the recyclability of Pd/Hf-MMT, the catalyst was separated from the reaction system by filtration, washed with ethanol for 5 times, and then dried under oven at 60 °C for 12 h. The sample was collected and transferred into a ceramic boat, and was reduced in a tubular furnace under H<sub>2</sub>/Ar atmosphere (containing 90% Ar) with a flow rate of 100 mL min<sup>-1</sup>. The sample was heated with a heating rate of 5 °C min<sup>-1</sup> from room temperature to 300 °C and held at this temperature for 6 h. Afterwards, the tubular furnace was cooled down to room temperature. Finally, the catalyst was reused in the next catalytic cycle.

**Synthesis of the standard products.** Because there were no commercial resources, we pre-synthesized the products as the standards. Taking the synthesis of *N*-dodecyl cyclohexylamine as an example, benzyl phenyl ether (0.5 mmol), dodecylamine (1 mmol), Pd/Hf-MMT (1 mol% Pd metal based on benzyl phenyl ether), and *p*-xylene (2 mL) were added into a stainless-steel reactor of 15 mL with a Teflon coating. After the air in the autoclave was replaced by hydrogen (three times), the autoclave was pressurized to the desired pressure with H<sub>2</sub> (0.3 MPa). Then, the autoclave was placed into a constant-temperature air bath and heated to the desired temperature (90 °C), and the reactions were conducted with a stirring rate of 800 rpm for the desired reaction time

(4 h). After the reaction, pure *N*-dodecyl cyclohexylamine was obtained by column chromatography (silica gel) using petroleum ether/EtOAc (1:1, 500 mL), and subsequently pure EtOAc as the elution solvent. Additionally, similar routes were employed to prepare other standard products.

**Instruments.** Conversions and yields were determined by a gas chromatography (Agilent 8890B) with the FID detector and a HP-5 column (30 m x 320  $\mu\text{m}$  x 0.25 $\mu\text{m}$ ).  $^1\text{H}$ , and  $^{13}\text{C}$  NMR data were recorded on a Bruker ARX 400 and Bruker ARX 500 spectrometers using  $\text{DMSO-}d_6$  or  $\text{CD}_3\text{OD}$  solvents. X-ray diffraction (XRD) patterns were collected on a Rigaku Ultima IV X-ray diffractometer using  $\text{Cu K}\alpha$  radiation at 35 kV and 25 mA ( $\lambda = 1.5405 \text{ \AA}$ ) over a  $2\theta$  ranging from 5 to 90  $^\circ$  at a scanning speed of 5 $^\circ$ /min. X-ray photoelectron spectroscopy (XPS) was worked with  $\text{Al K}\alpha$  ( $h\nu = 1486.36 \text{ eV}$ ) radiation with a Thermo Scientific K-Alpha spectrometer. The crystal morphology and size were determined by scanning electron microscopy (SEM) on a Hitachi S-4800 microscope and transmission electron microscopy (TEM) on a JEOL JEM-2100F microscope at an accelerating voltage of 200 kV. The scanning electron microscopy (SEM) was performed on a German ZEISS Sigma 300. The Pd and Hf contents were quantified by inductively coupled plasma emission spectrometer (ICP-OES) on an Optima 8300. Nitrogen sorption isotherms were obtained at 77 K by using a BEL-SORP-MAX instrument after degassing the samples for 8 h under vacuum at 473 K. The specific surface area was measured using the Brunauer-Emmett-Teller (BET) analysis method. Temperature programmed desorption was conducted on AutoChem Discovery and AutoChem 2920.

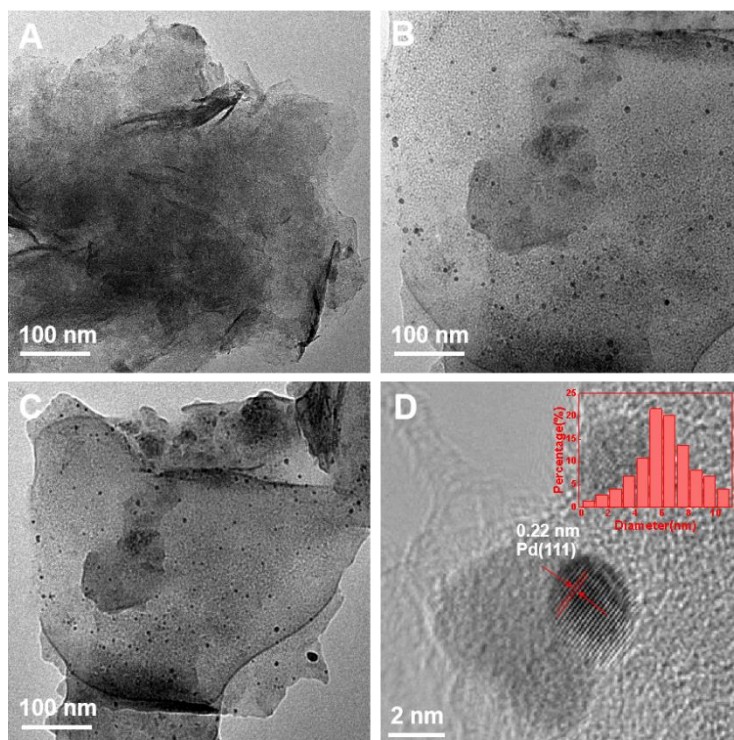

**Fig. S1.** TEM images of (A) MMT, (B) Pd/MMT, and (C and D) Pd/Hf-MMT.

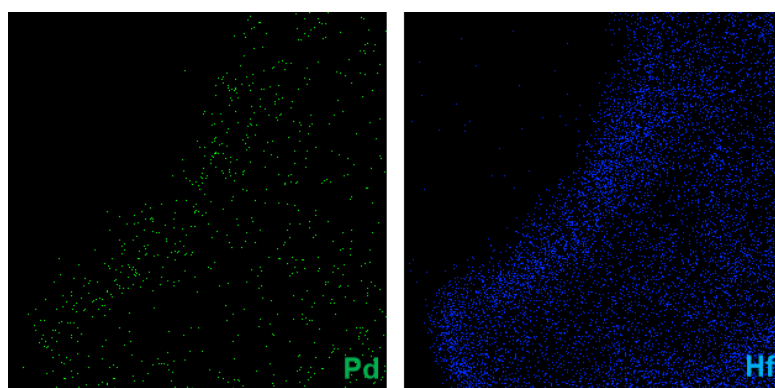

**Fig. S2.** Elemental distribution mapping of Pd/Hf-MMT.

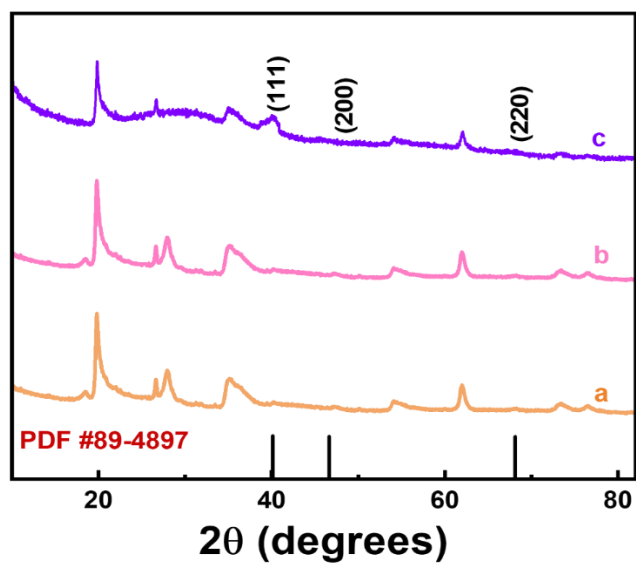

**Fig. S3.** Powder XRD patterns. (a) MMT, (b) Pd/MMT, and (c) Pd/Hf-MMT.

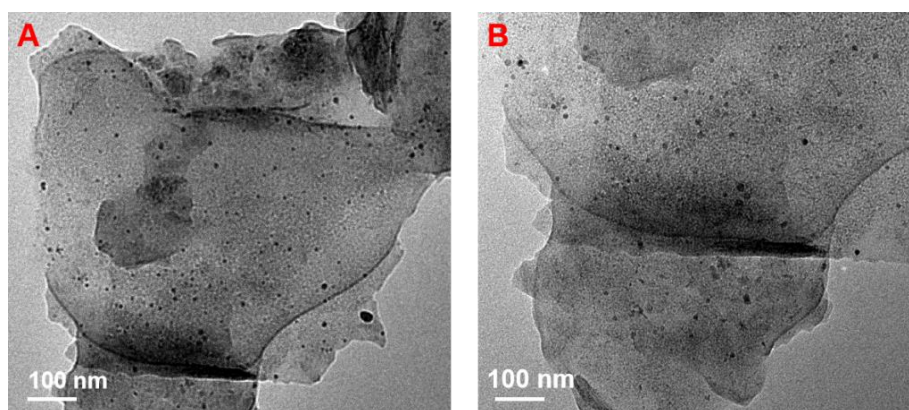

**Fig. S4.** TEM image of (A) the fresh Pd/Hf-MMT, and (B) the recovered Pd/Hf-MMT.

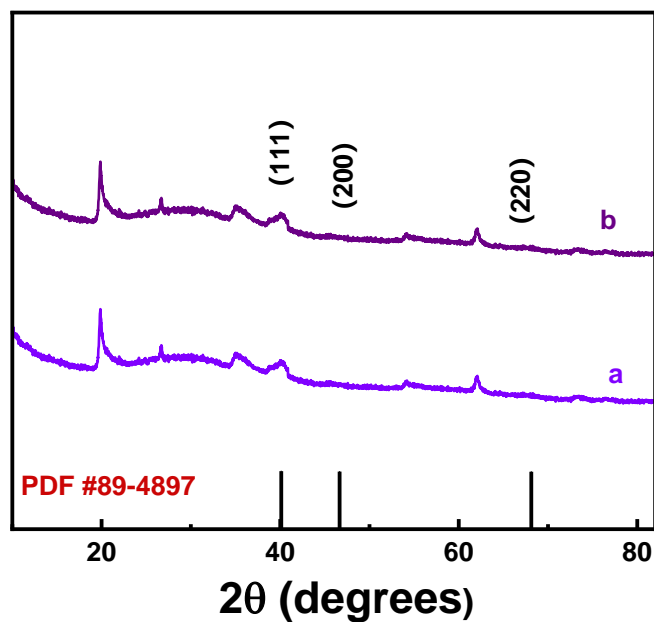

**Fig. S5.** Powder XRD patterns. (a) The fresh Pd/Hf-MMT, and (b) the recovered Pd/Hf-MMT.

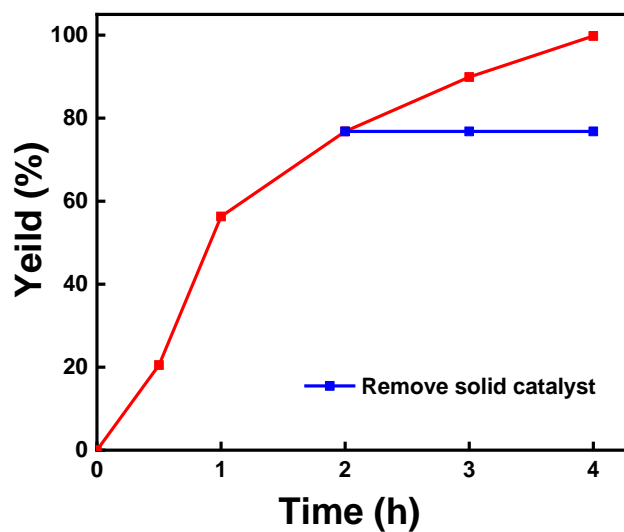

**Fig. S6.** Time-yield plots for reductive amination of benzyl phenyl ether with Pd/Hf-MMT (Red line) or removing Pd/Hf-MMT after 2 h (Blue line). Reaction conditions: benzyl phenyl ether, 0.5 mmol; dodecylamine, 1 mmol; *p*-xylene, 2 mL; 90 °C; 4 h; Pd/Hf-MMT, 25 mg; H<sub>2</sub>, 0.3 MPa.

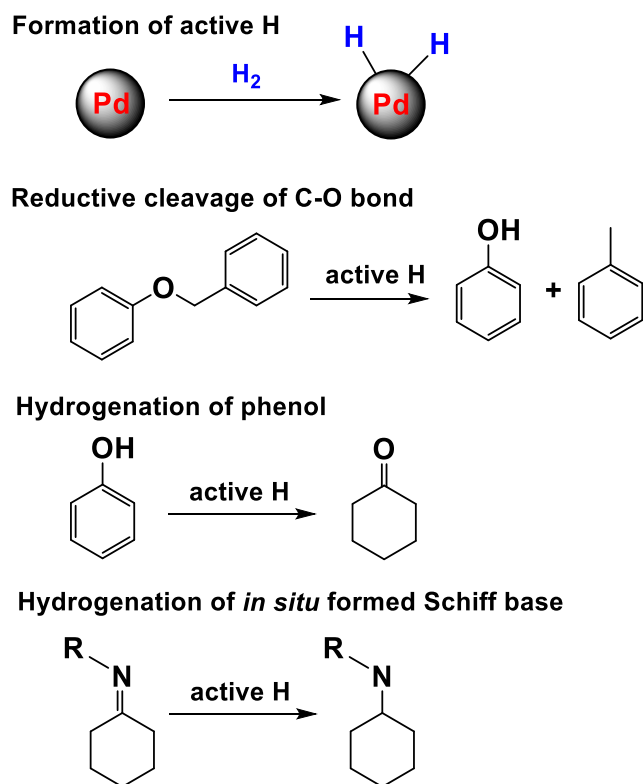

Fig. S7. Reductive steps in the conversion process.

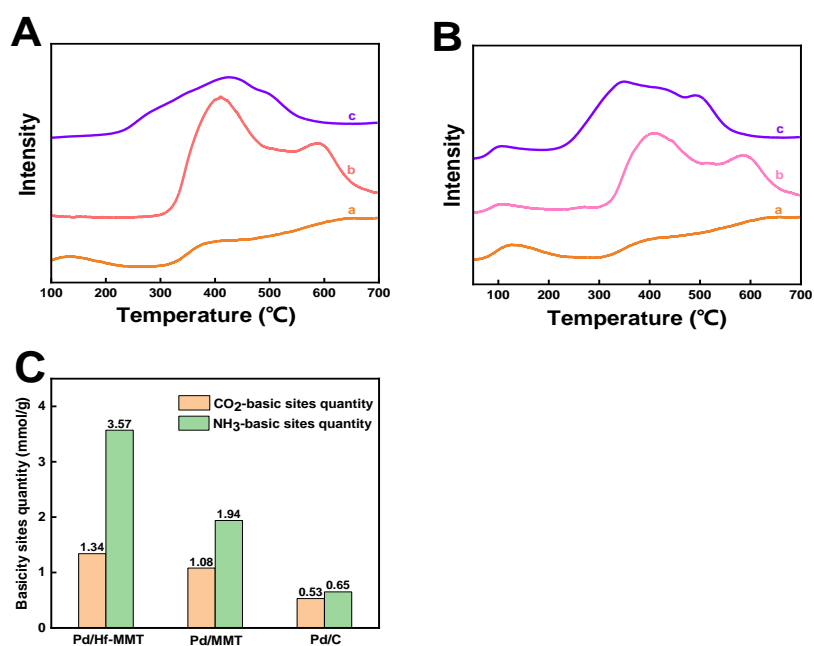

Fig. S8. (A) CO<sub>2</sub>-TPD profile, (B) NH<sub>3</sub>-TPD profile, and (C) quantity of acidic or basic sites in different catalysts. In A and B, a, b, and c represented MMT, Pd/MMT, and Pd/Hf-MMT, respectively.



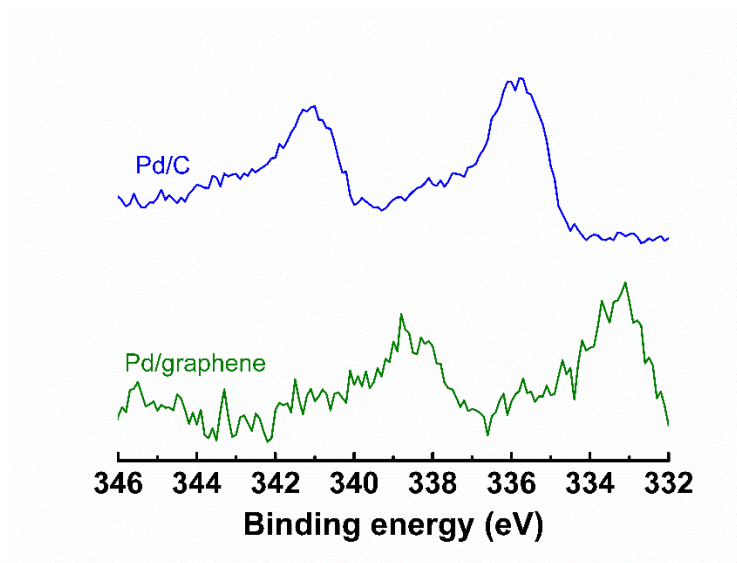

Fig. S9. XPS spectra of Pd 3d in Pd/C and Pd/graphene.

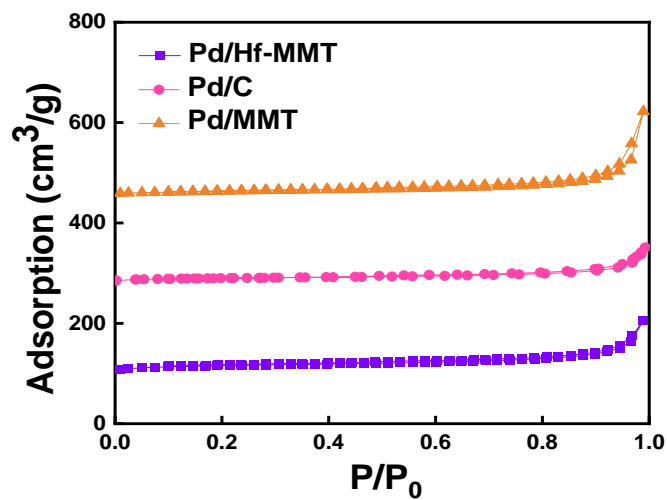

Fig. S10. N<sub>2</sub> adsorption-desorption isotherms of different materials.

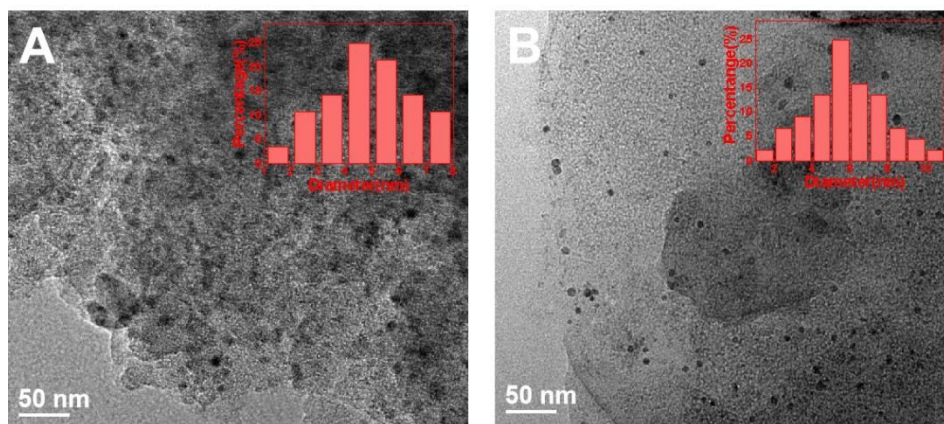

**Fig. S11.** TEM images and particle size distribution of (A) Pd/C, and (B) Pd/MMT.

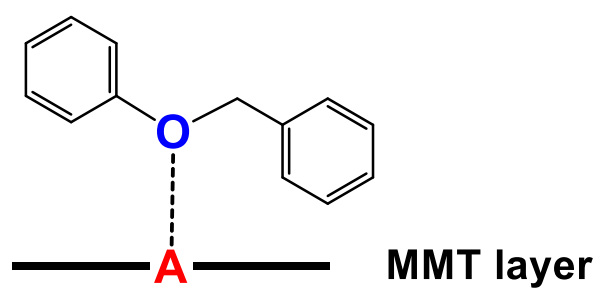

**A: acidic sites on MMT**

**Scheme S1.** The interaction between the acidic sites on MMT and the O atom of the benzyl phenyl ether.

**Table S1.** ICP-OES analysis of different catalysts.

| Entry | Catalyst          | Pd (wt%) | Hf (wt%) |
|-------|-------------------|----------|----------|
| 1     | Pd/MMT            | 2        | 0        |
| 2     | Pd/Hf-MMT         | 2        | 10.2     |
| 3     | Pd/Hf-MMT (used)  | 1.9      | 10       |
| 4     | Reaction solution | 0        | 0        |

**Table S2.** Summary of the results from N<sub>2</sub> adsorption-desorption.

| Entry | Catalyst  | BET surface area (m <sup>2</sup> g <sup>-1</sup> ) |
|-------|-----------|----------------------------------------------------|
| 1     | Pd/MMT    | 35.1                                               |
| 2     | Pd/C      | 112.4                                              |
| 3     | Pd/Hf-MMT | 78.1                                               |

# <sup>1</sup>H NMR and <sup>13</sup>C NMR Data

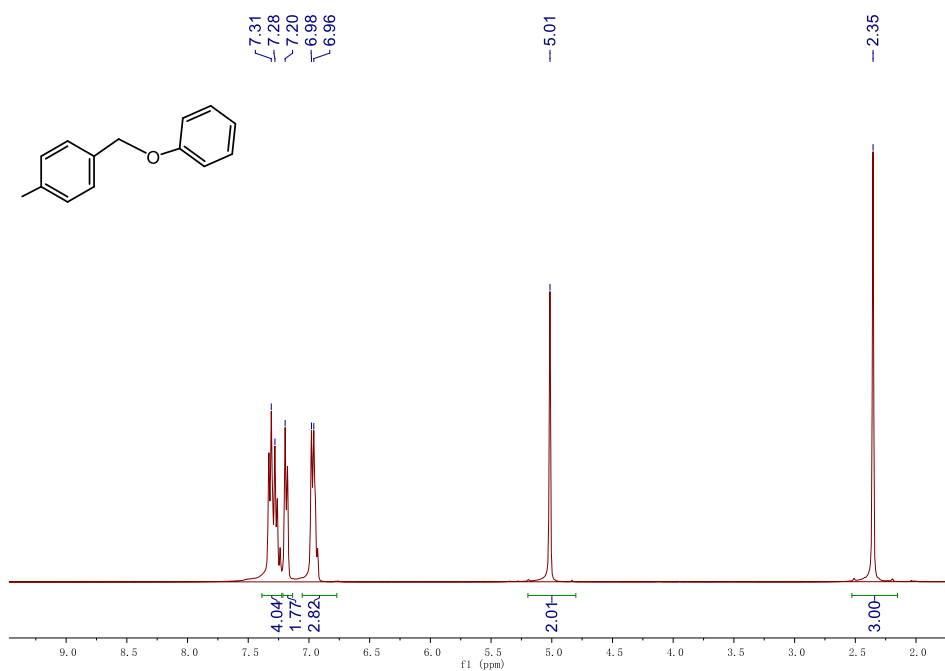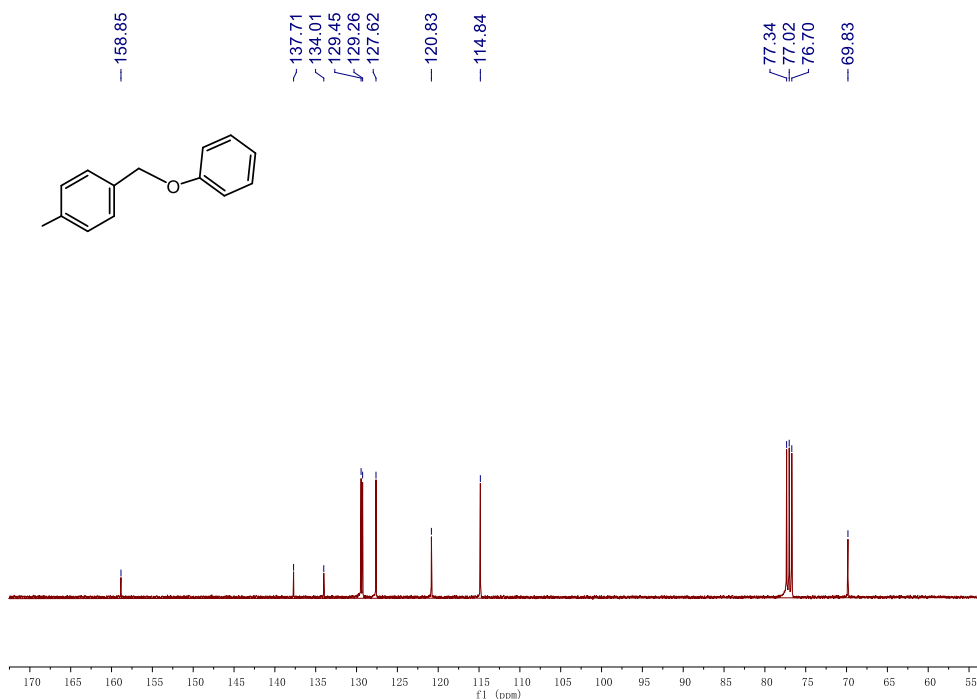

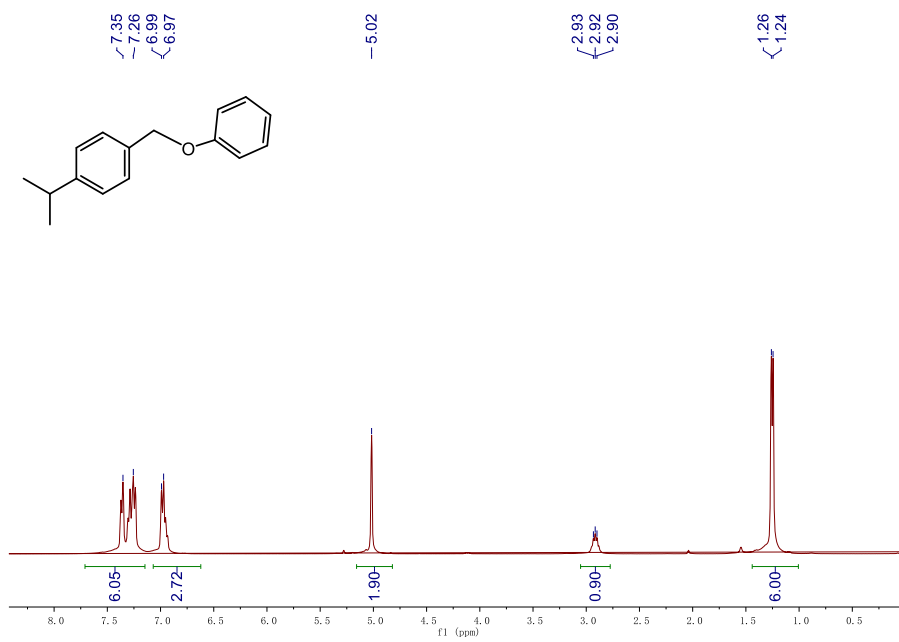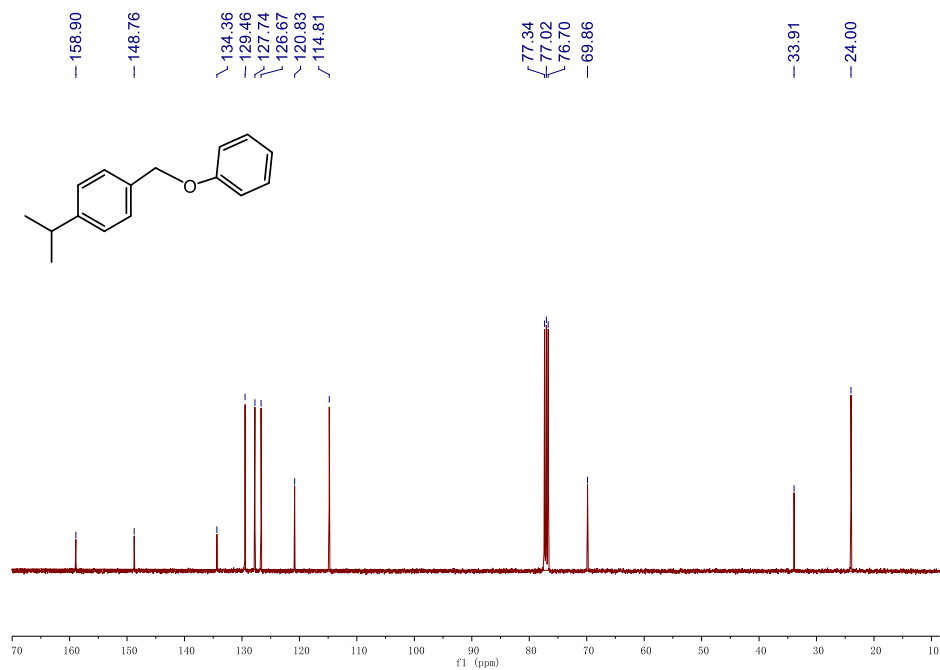

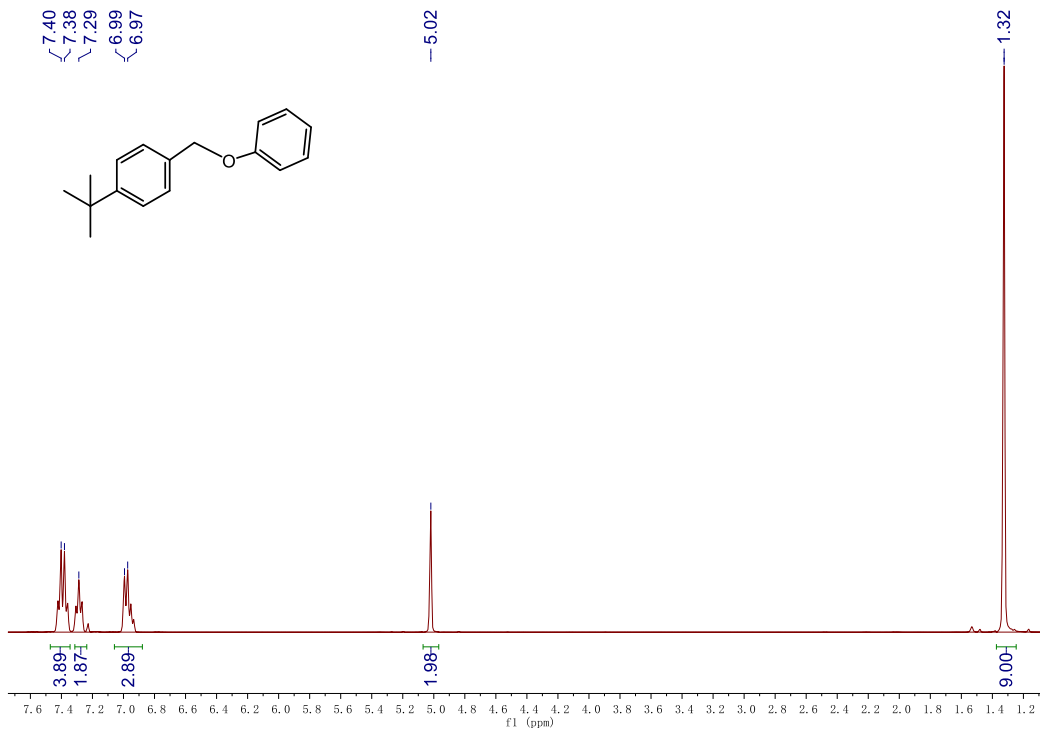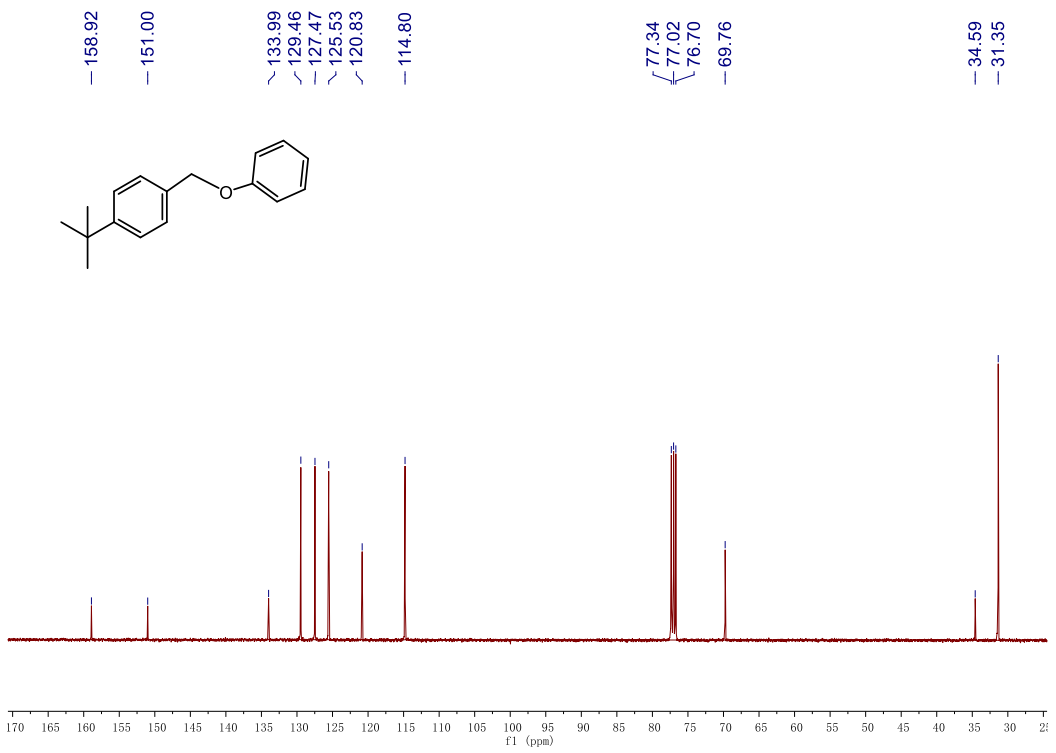

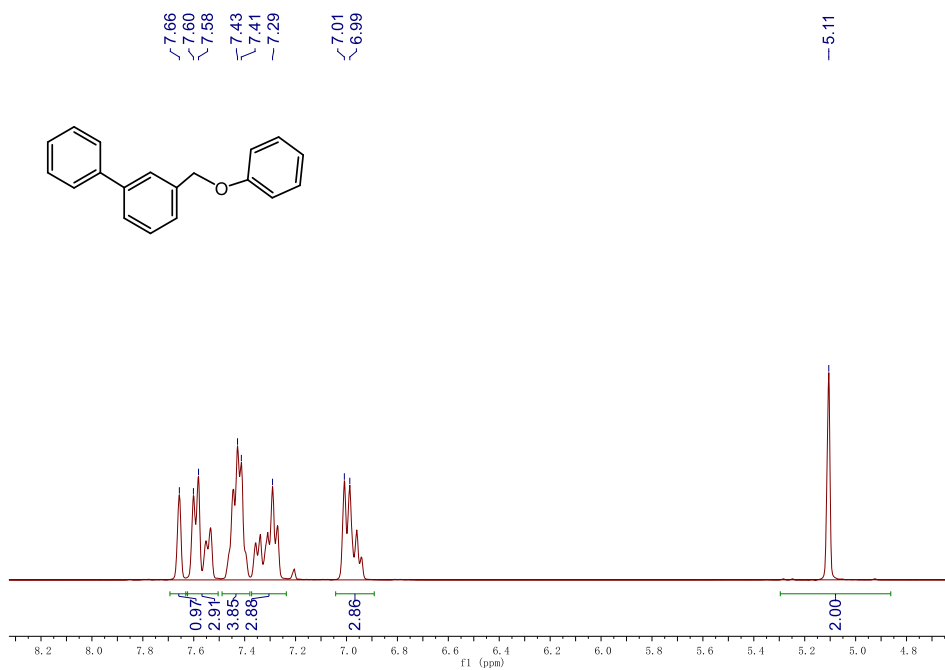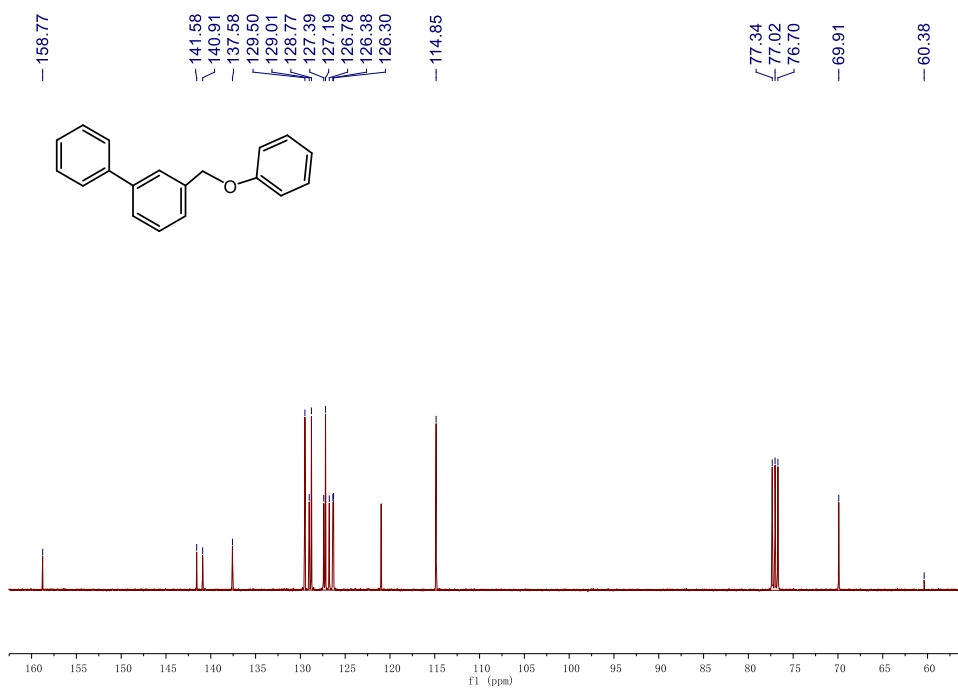



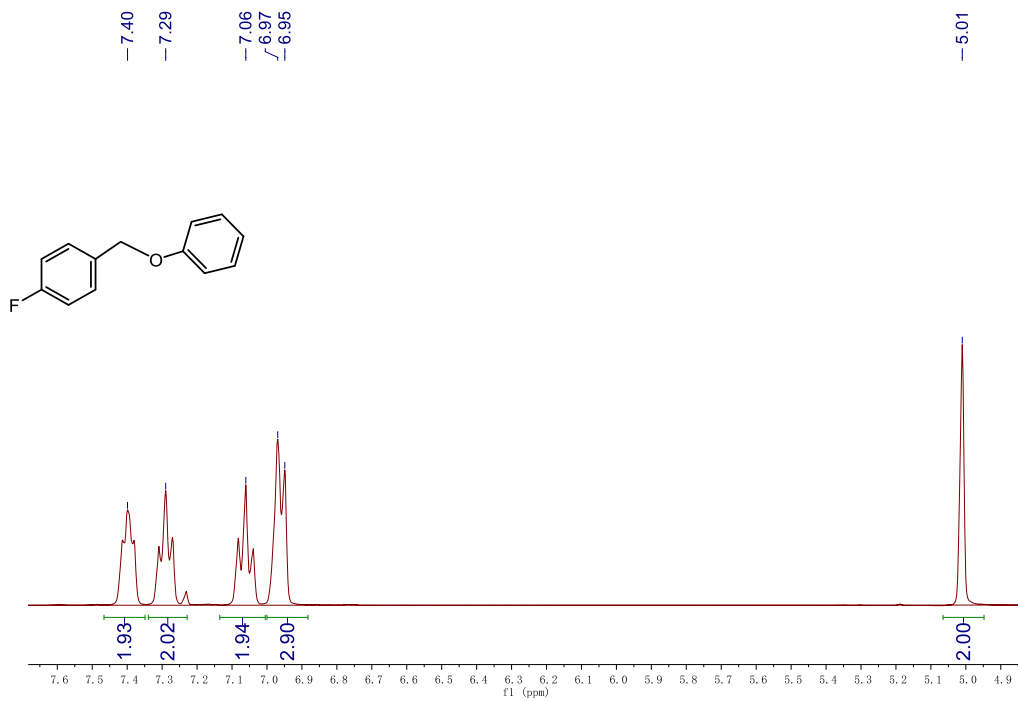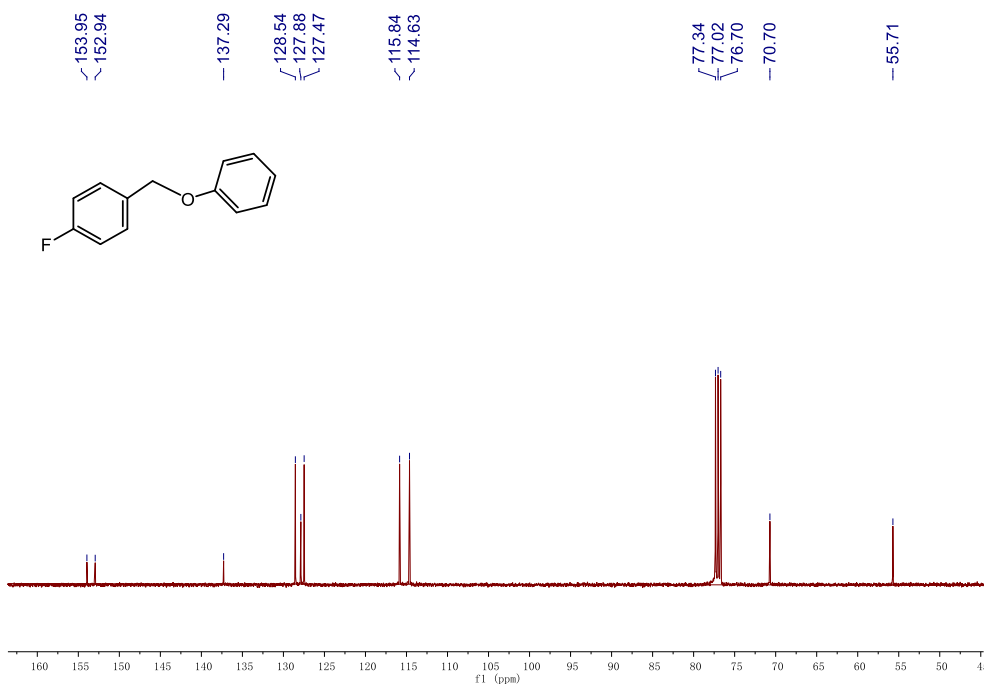

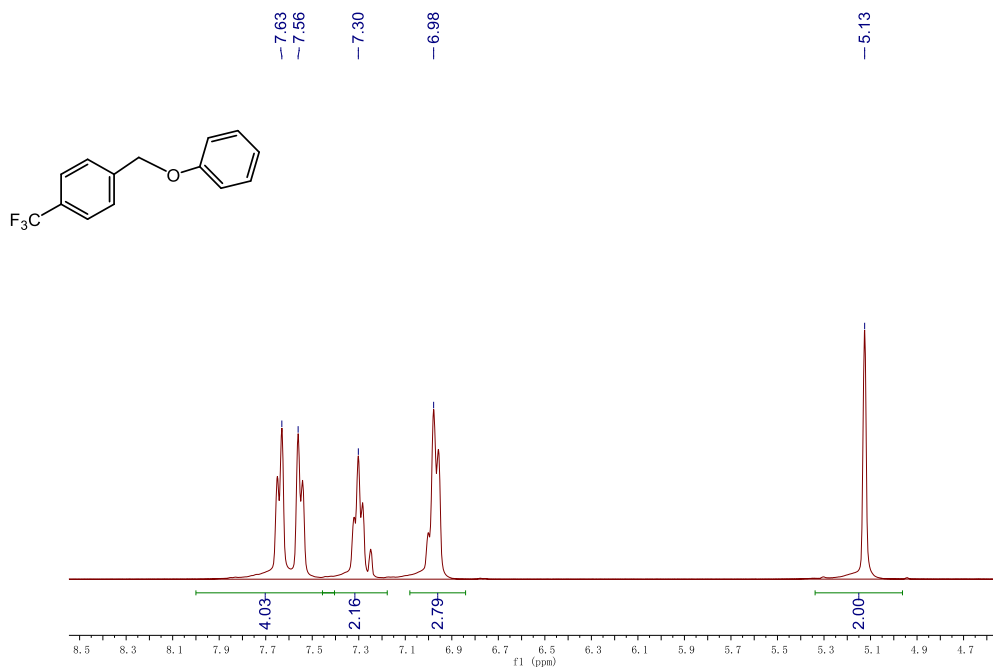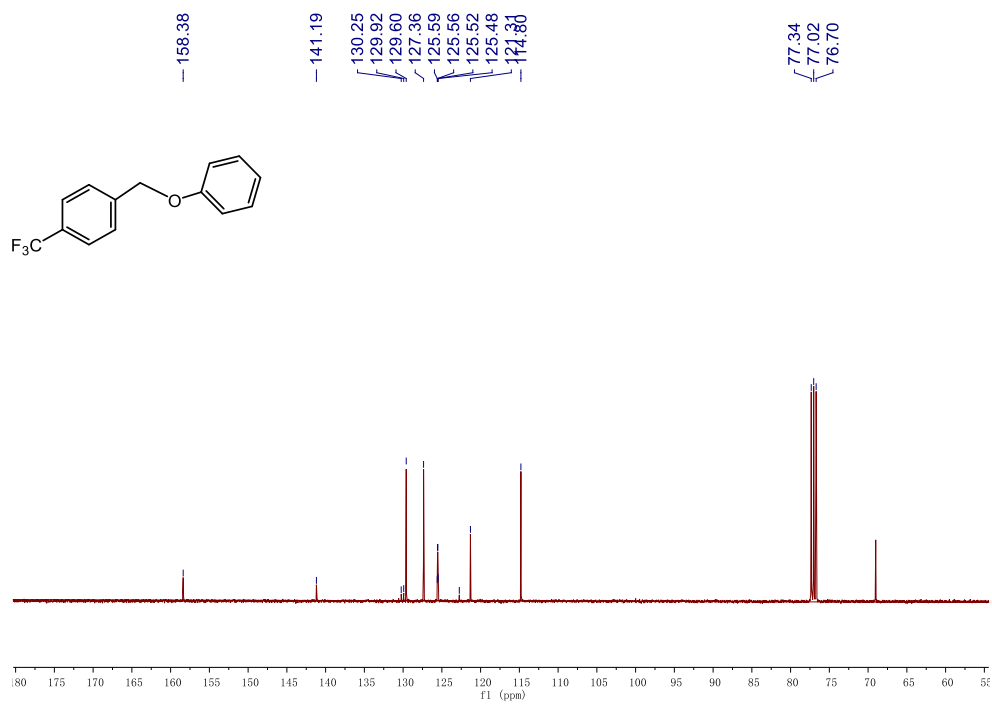

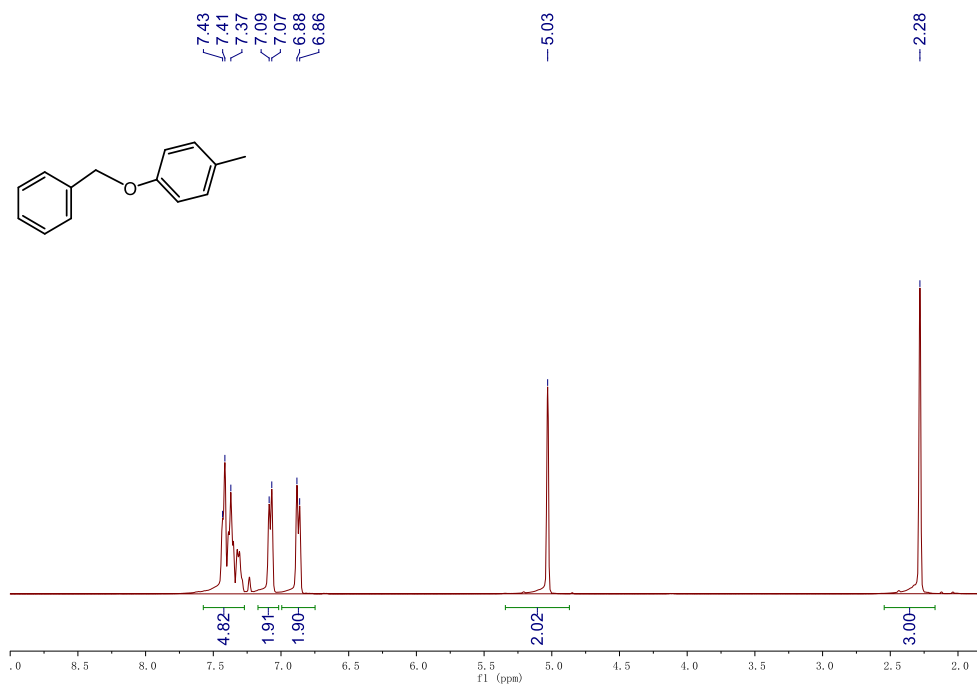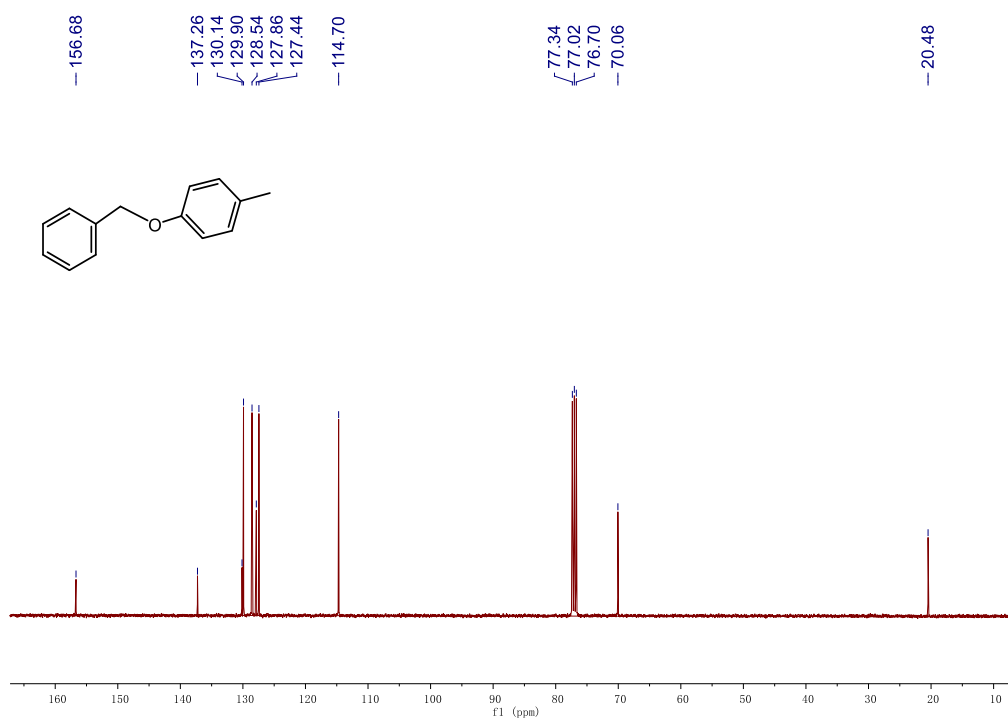

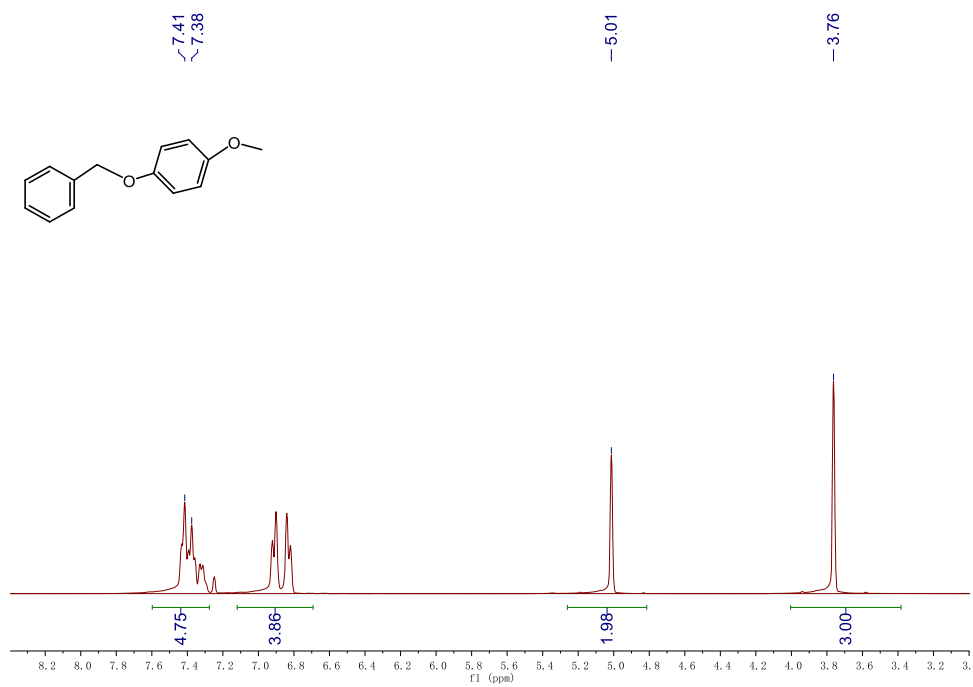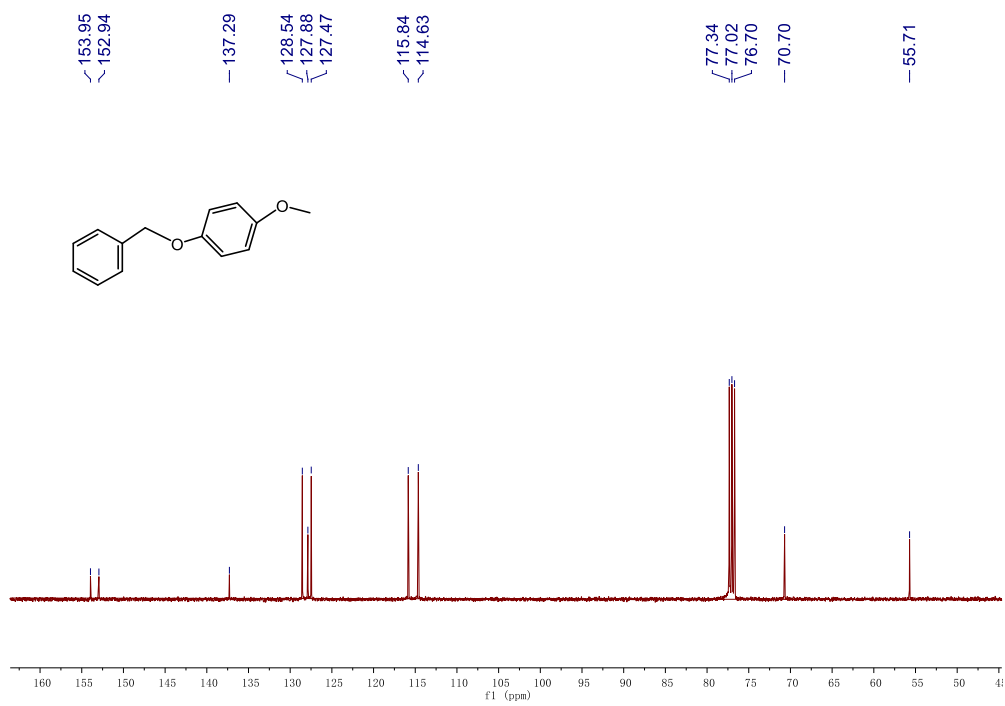

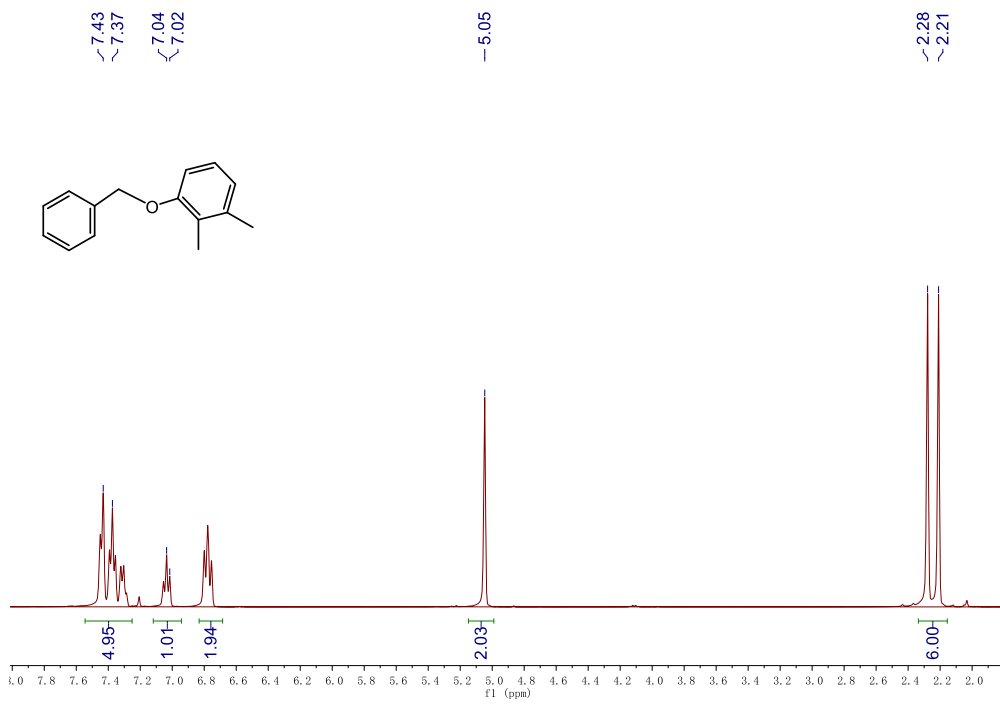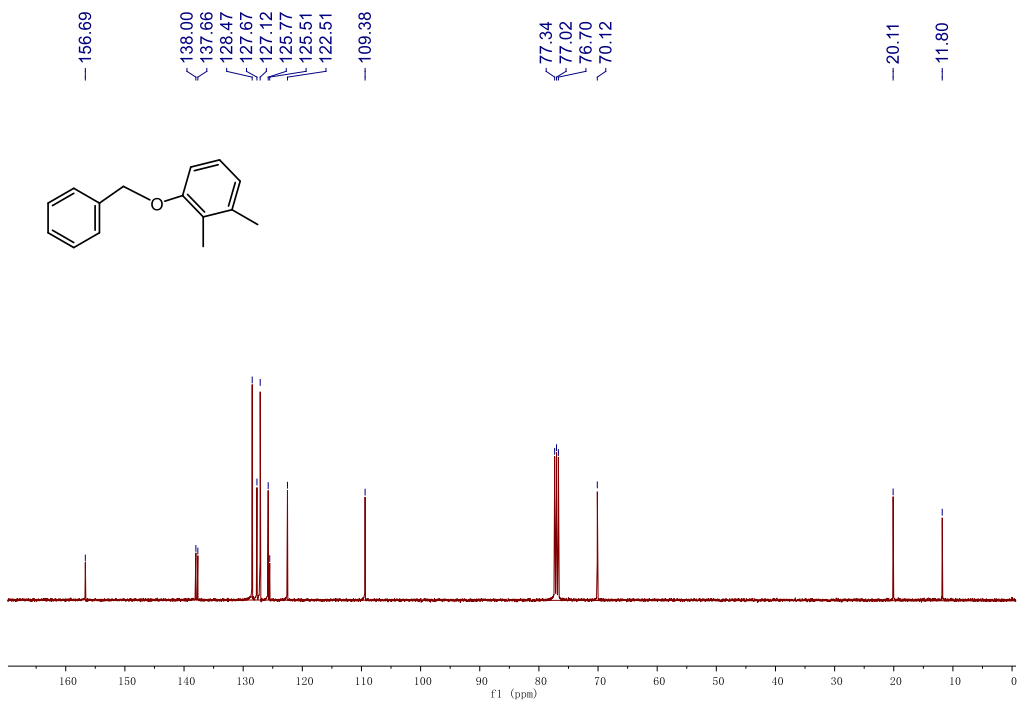

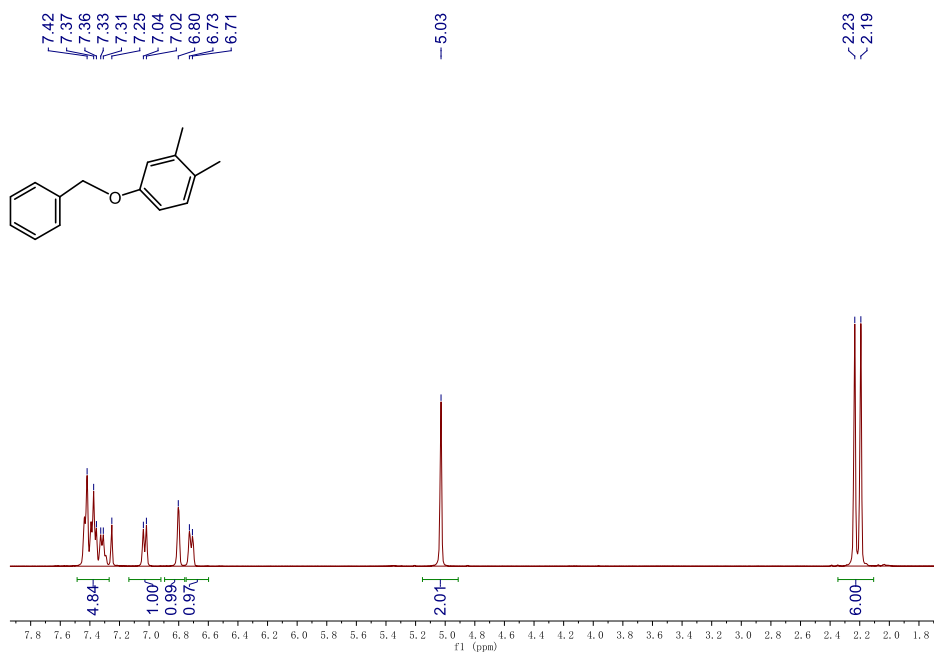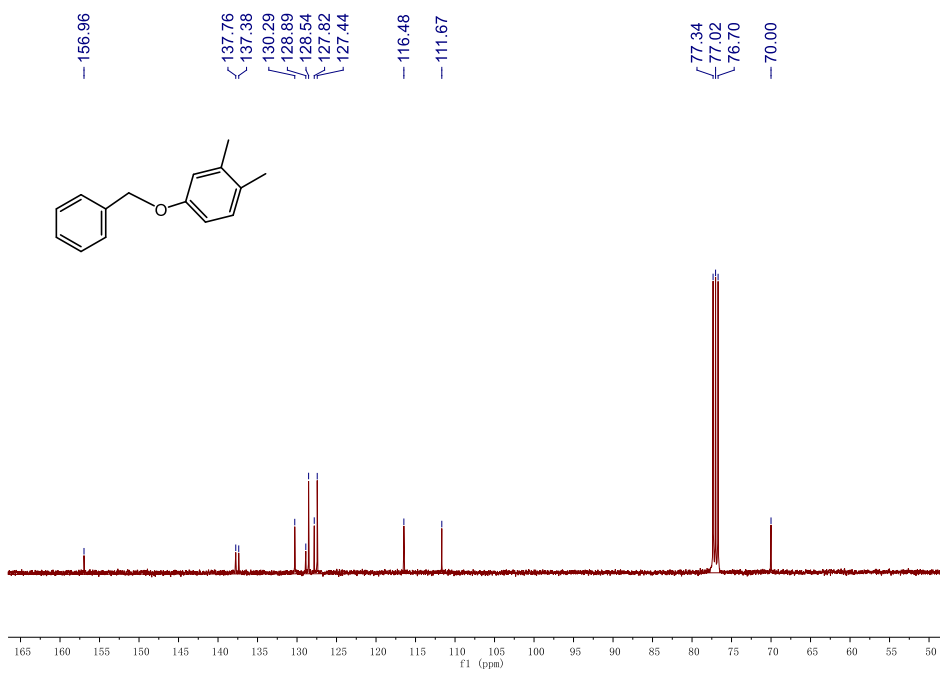

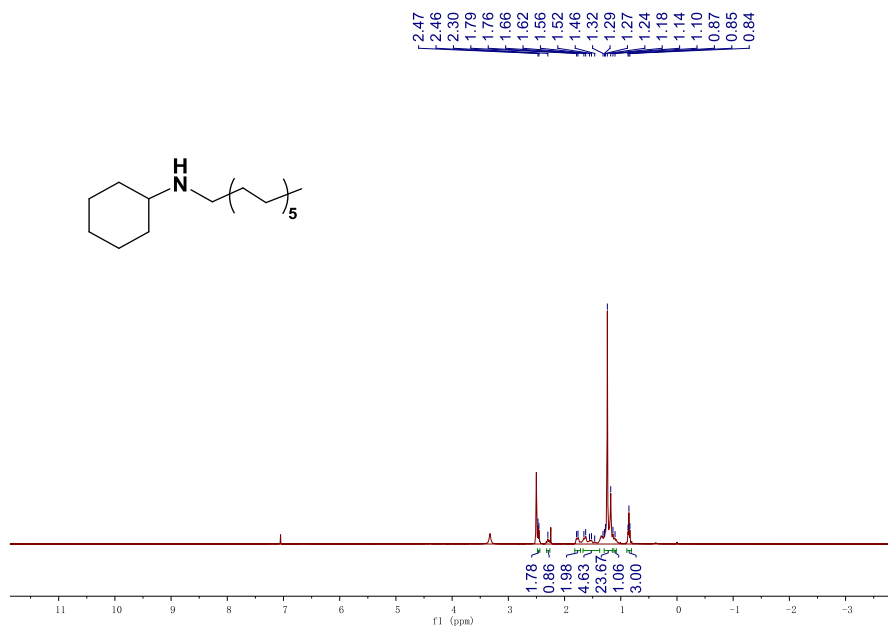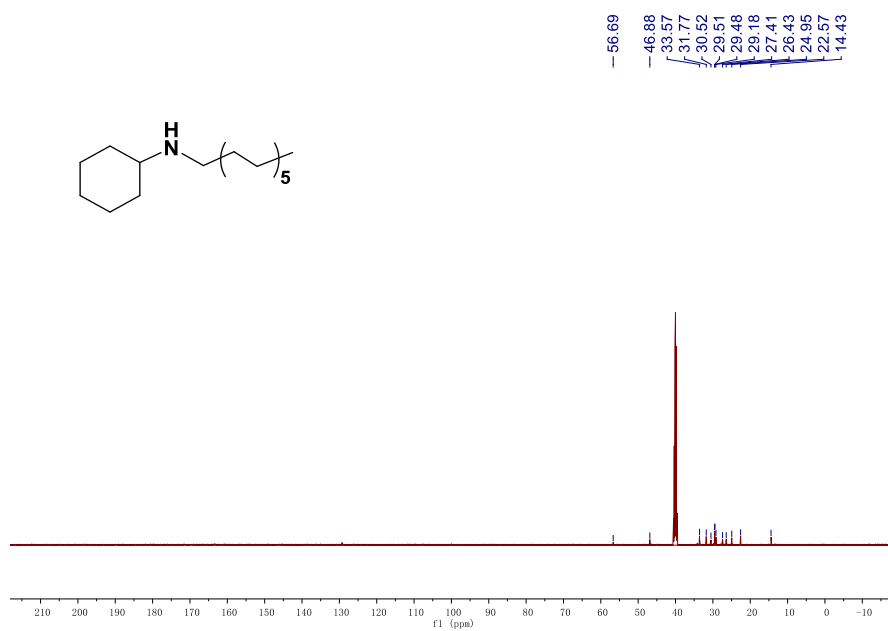

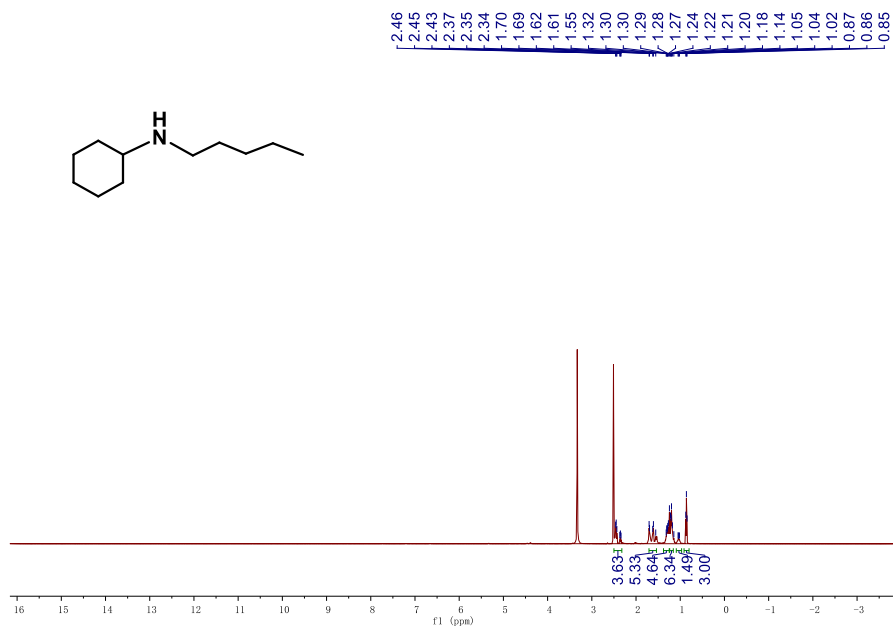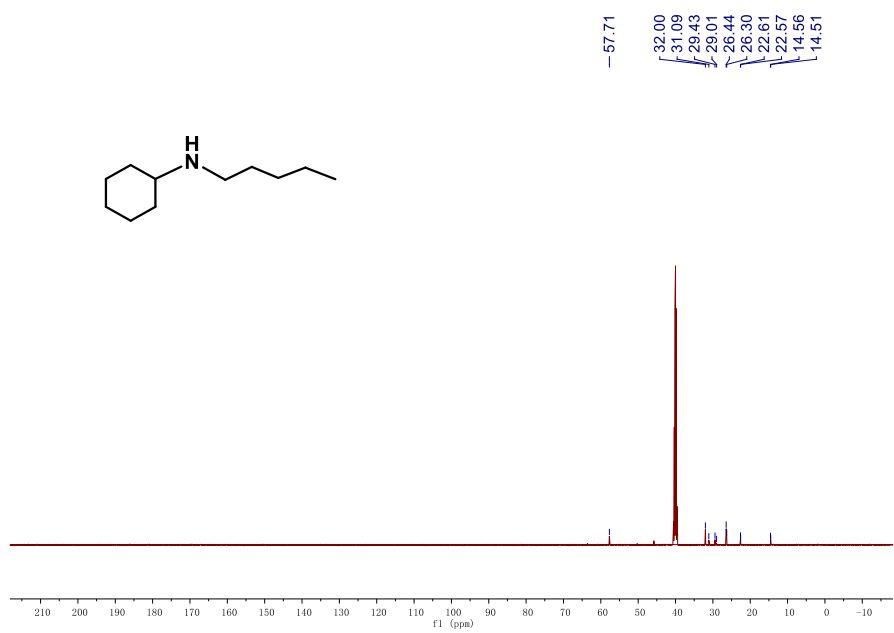



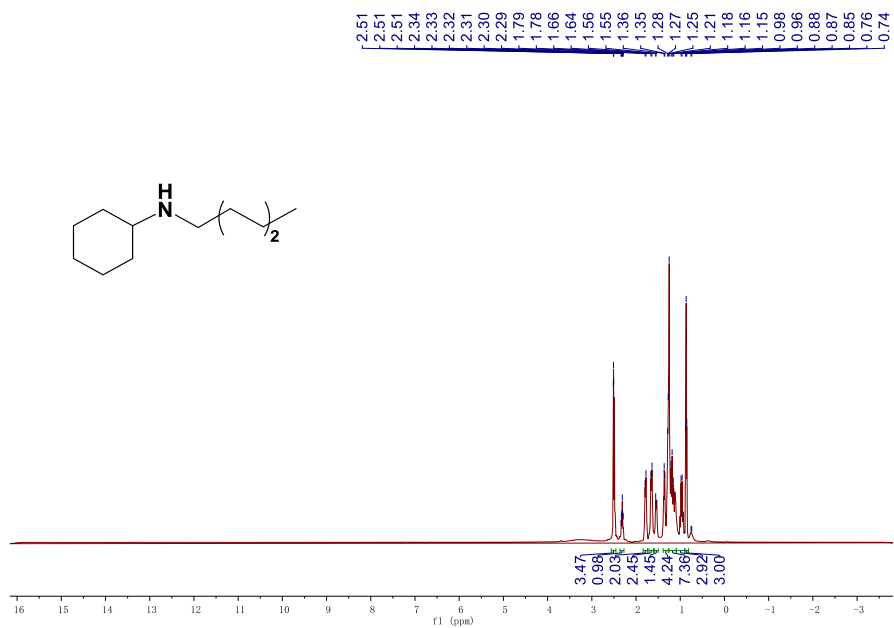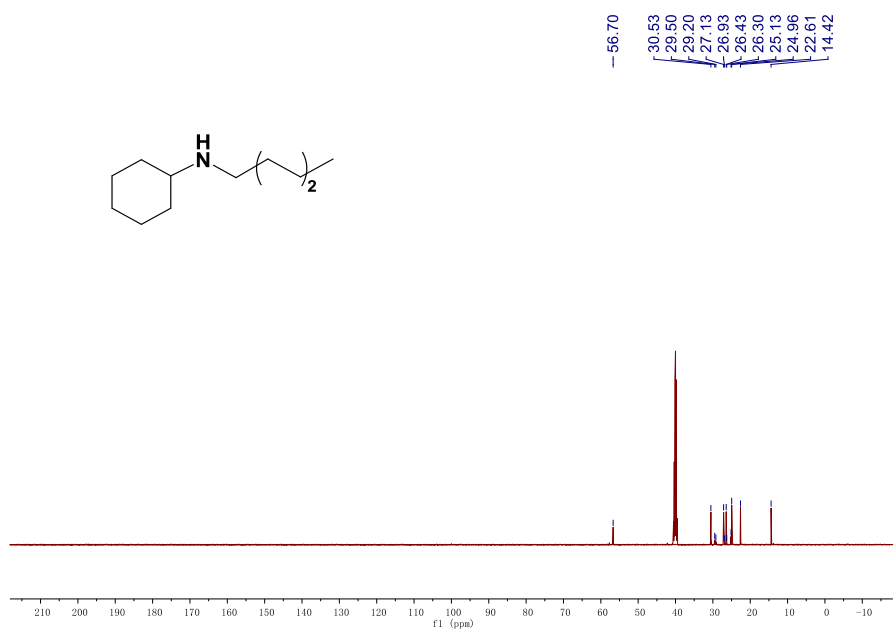

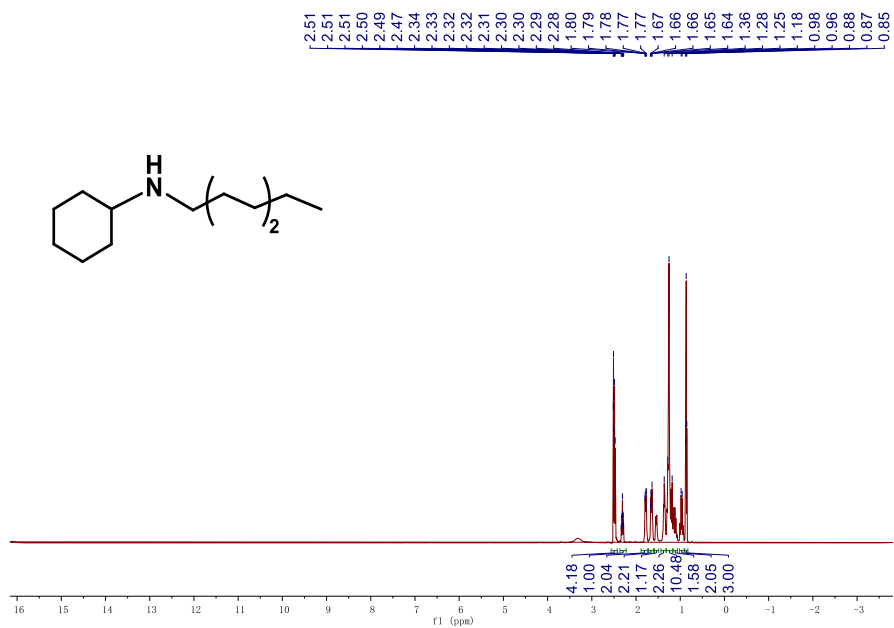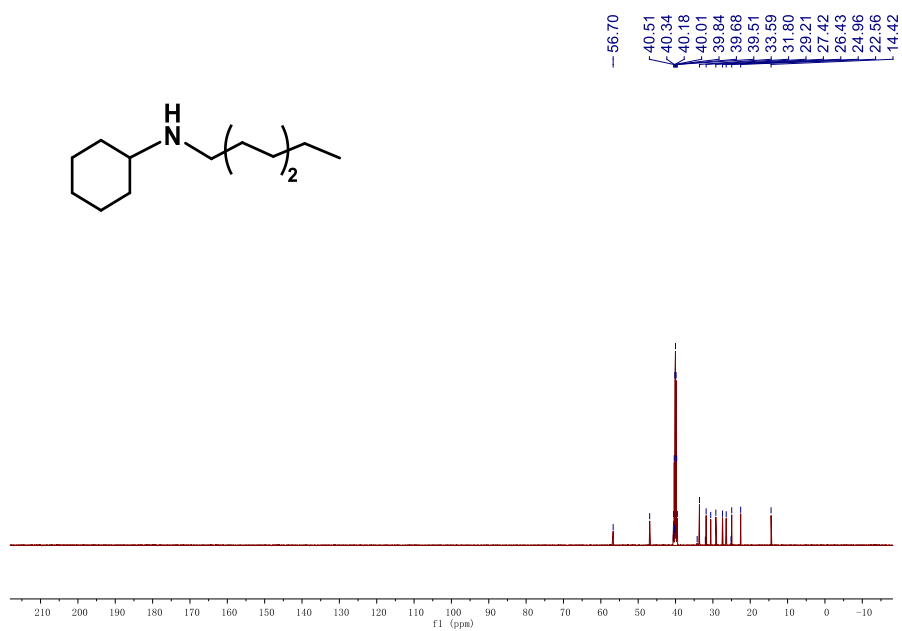

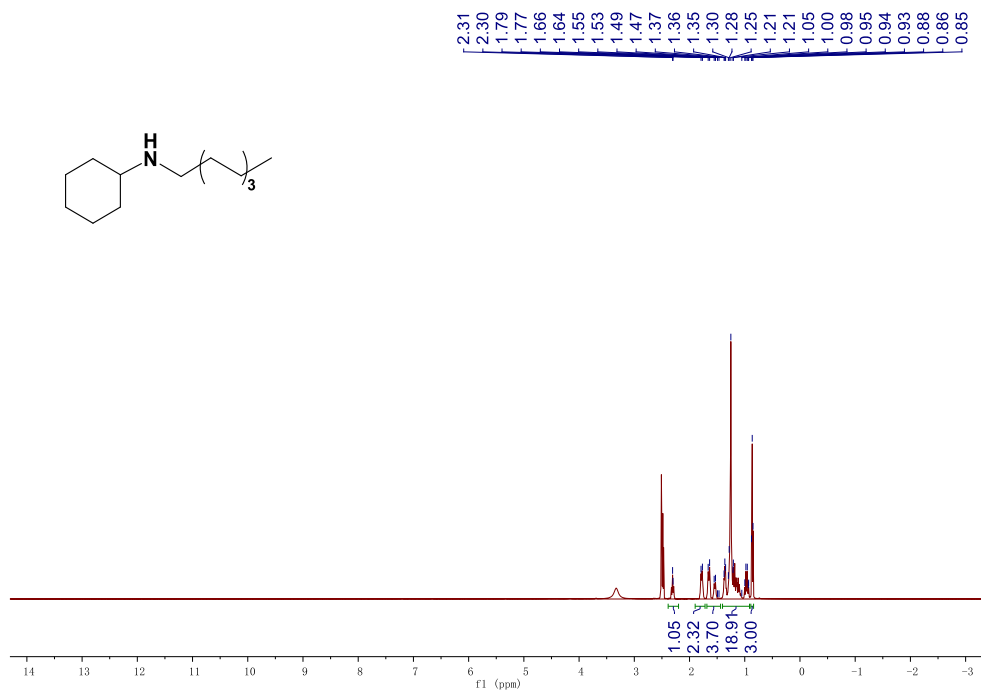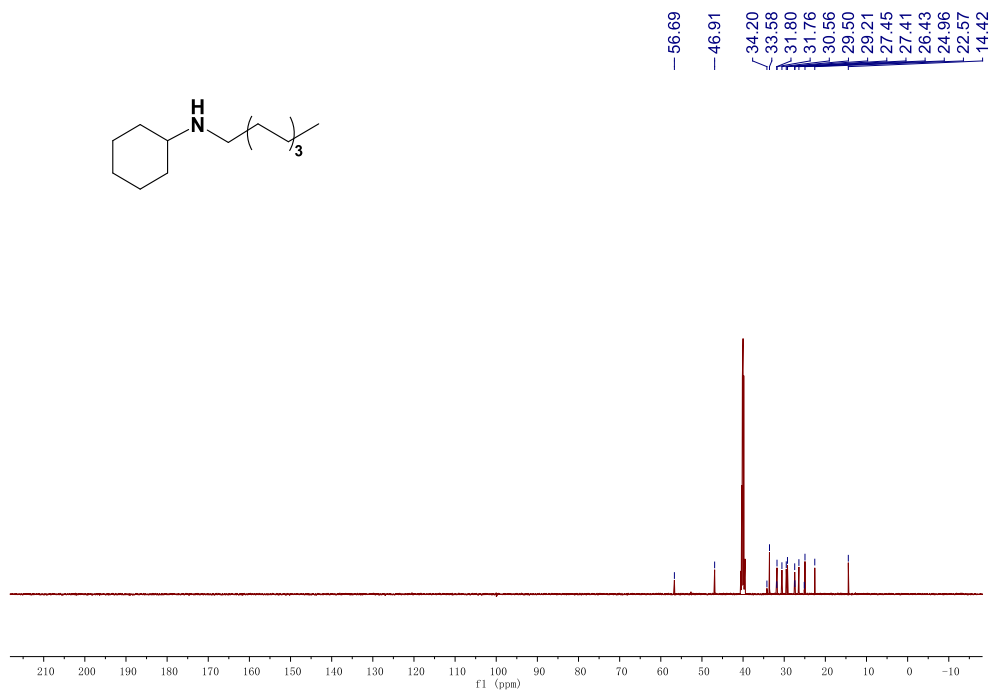

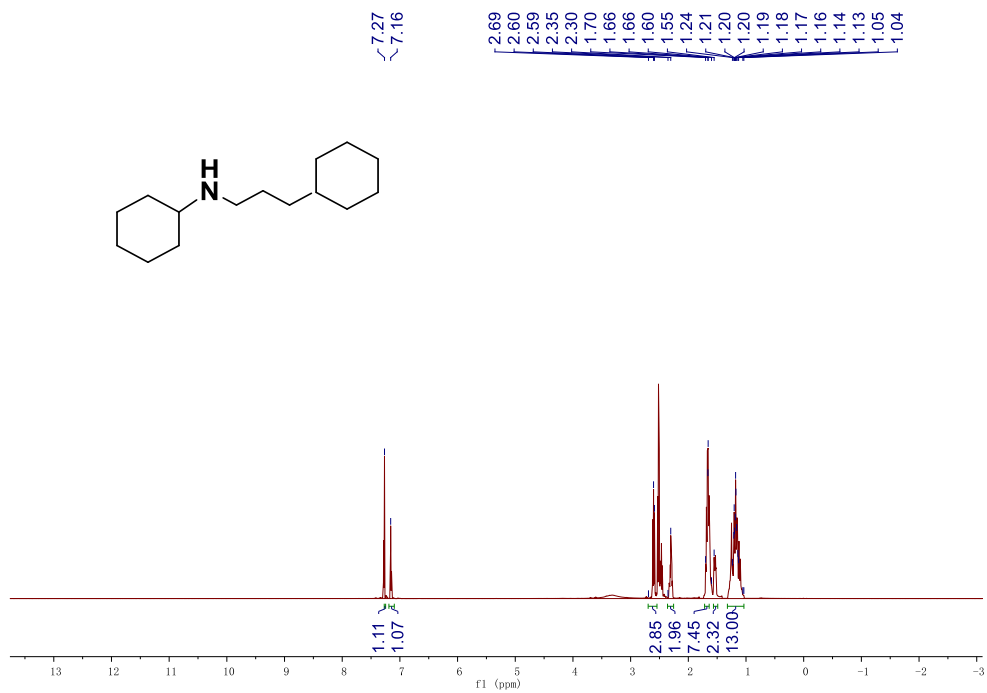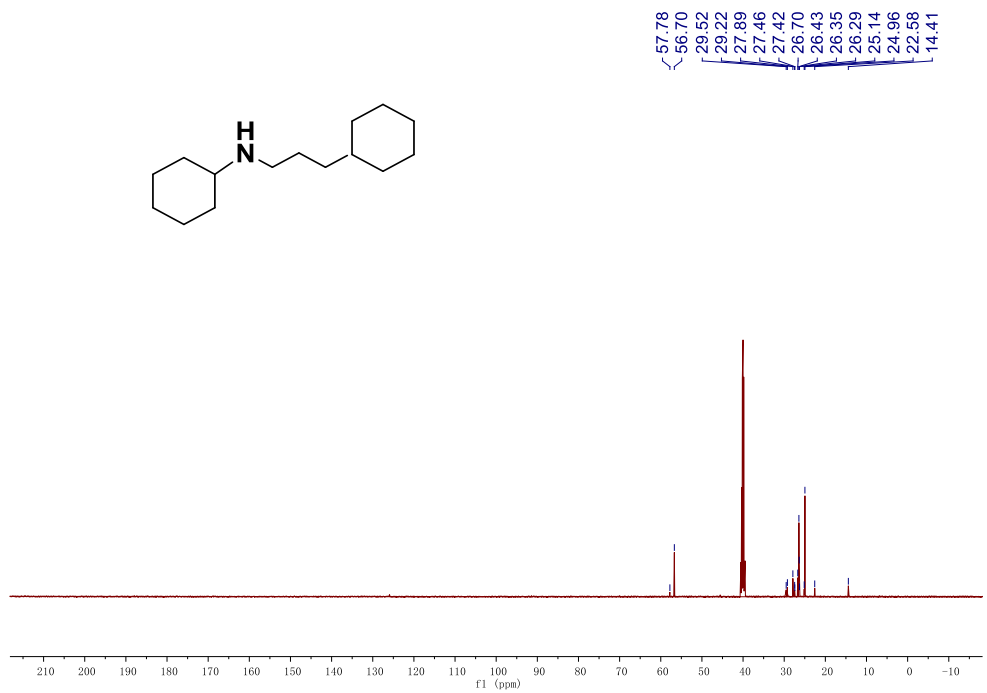

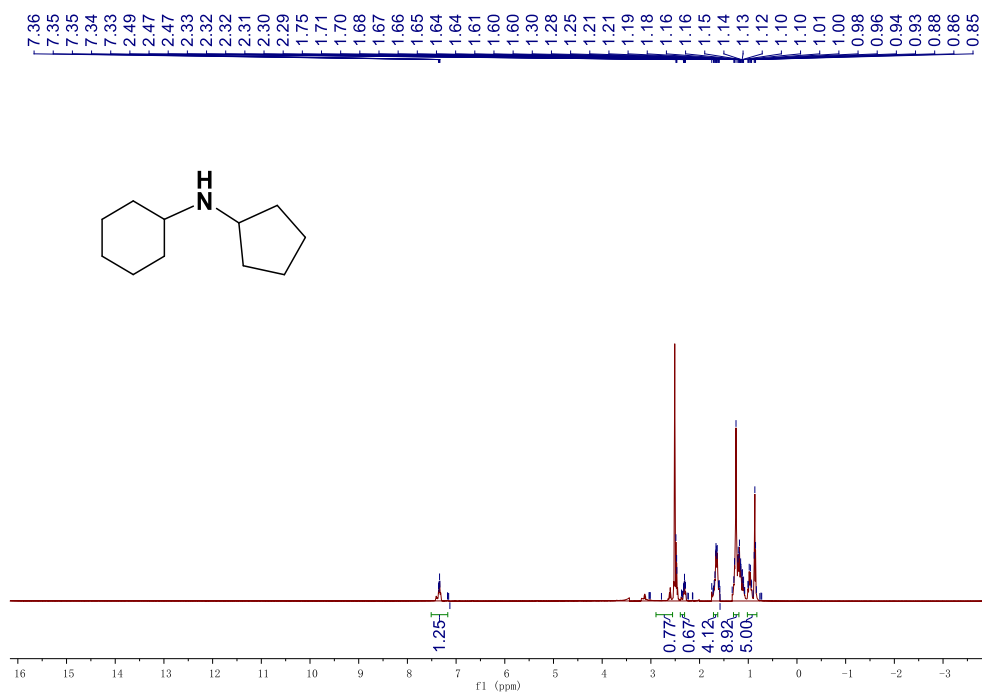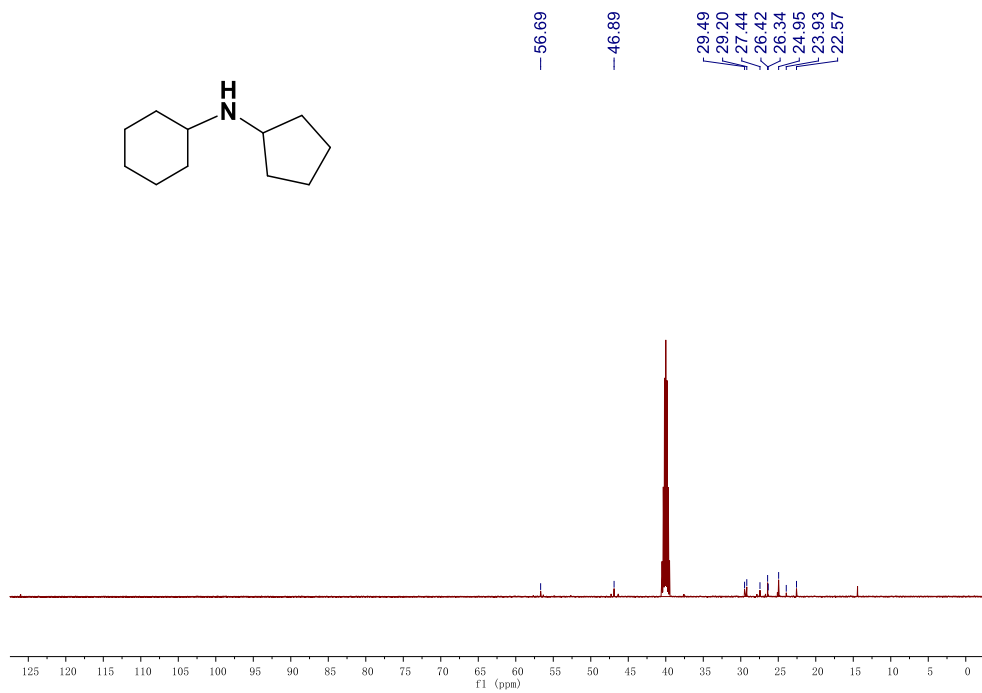

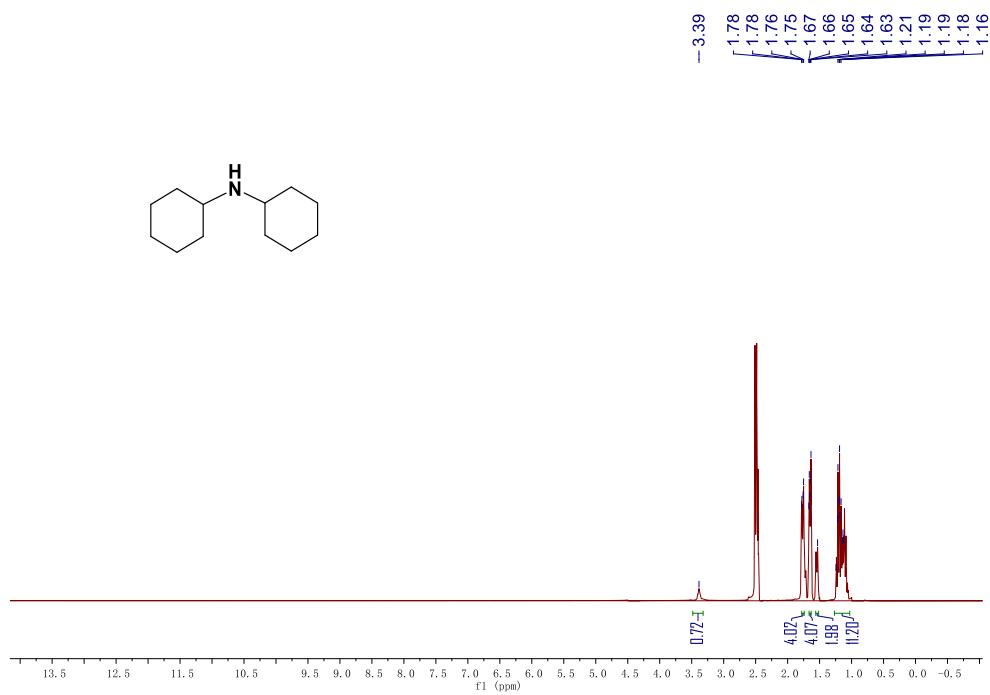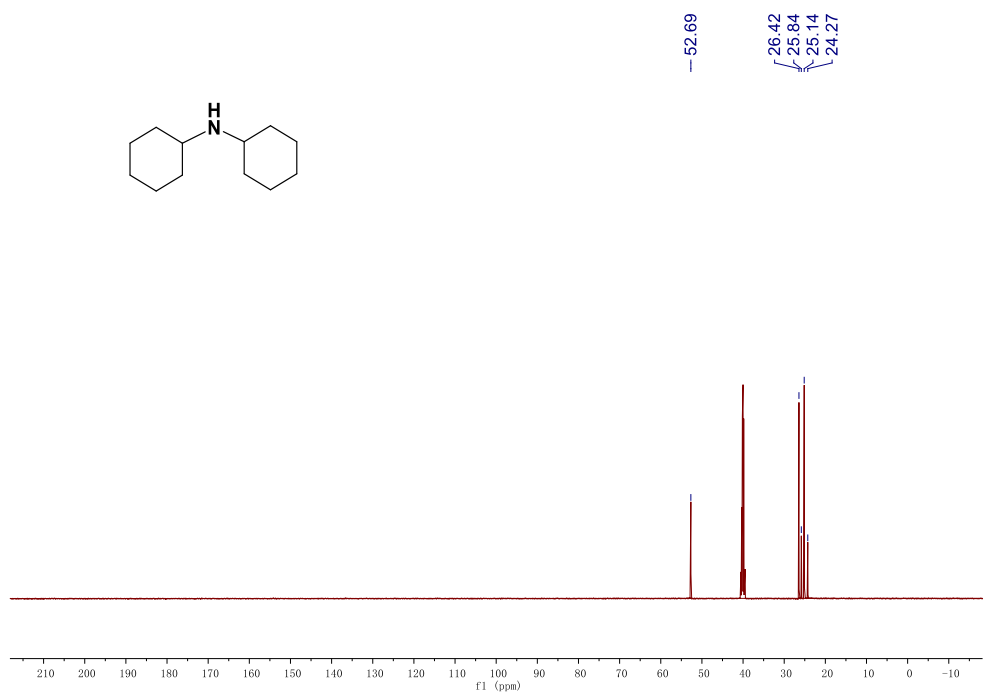

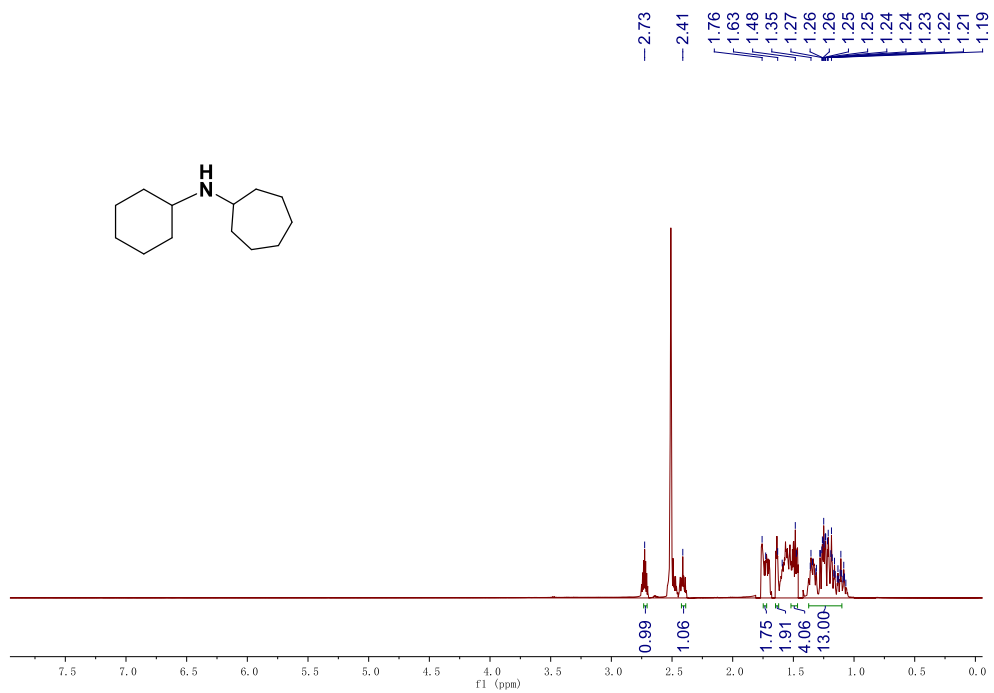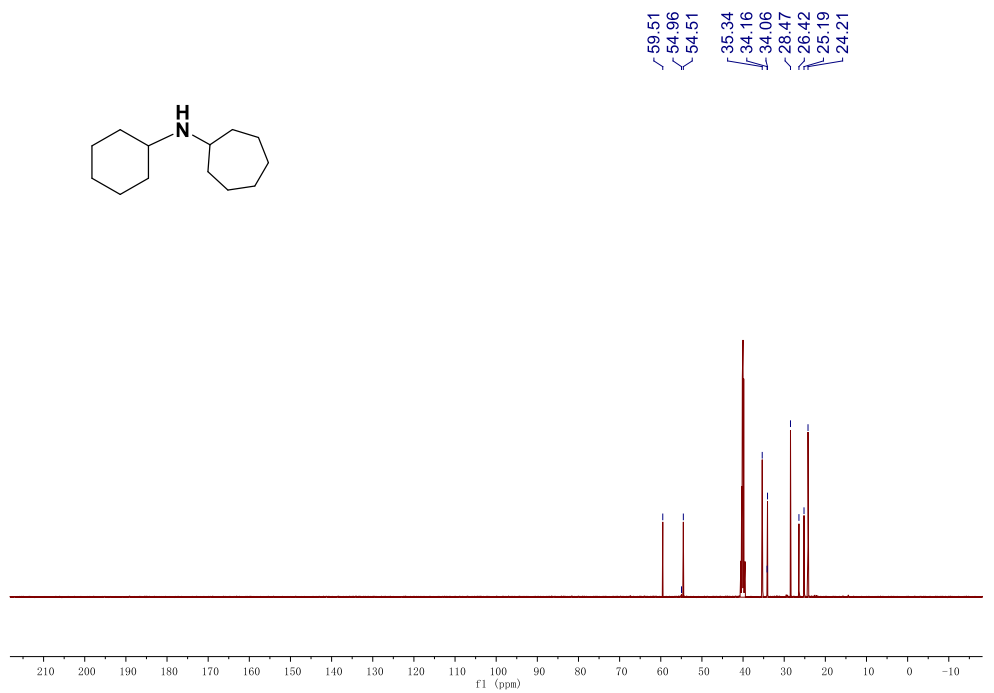

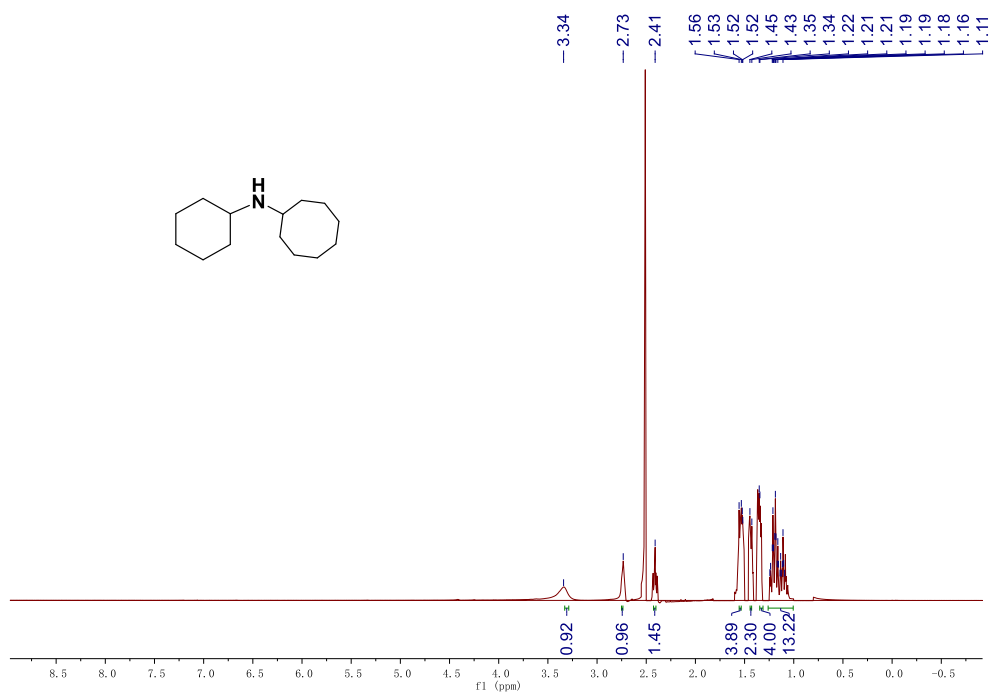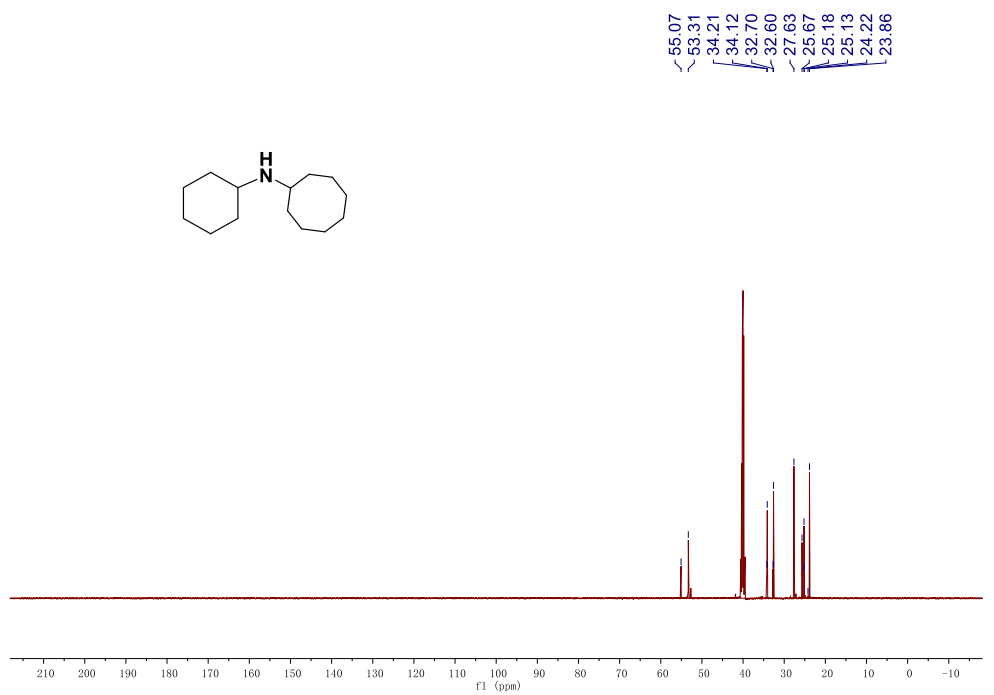



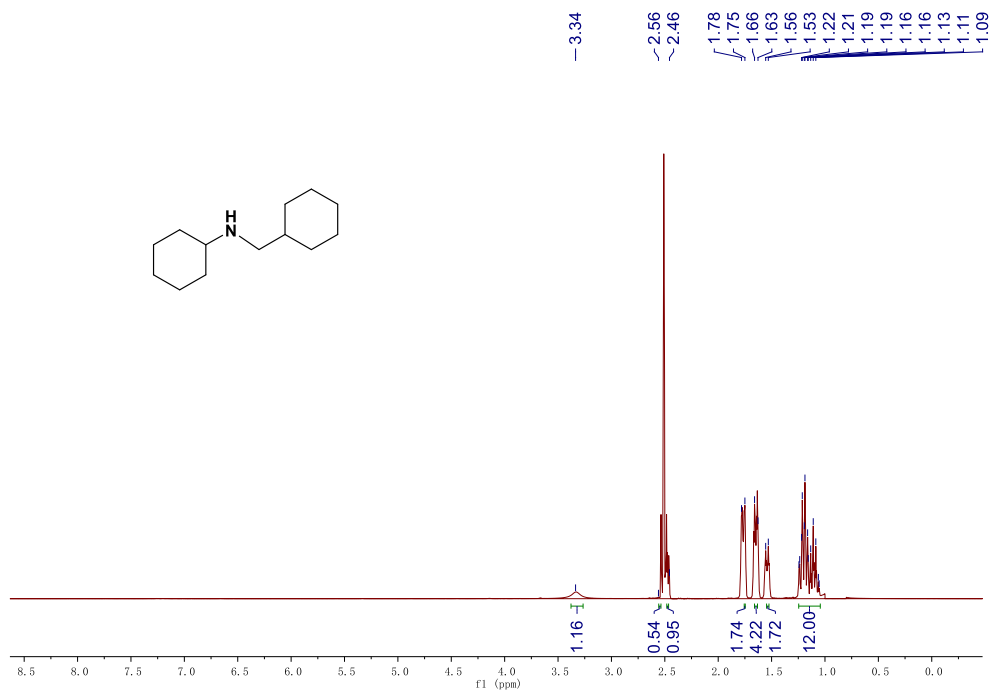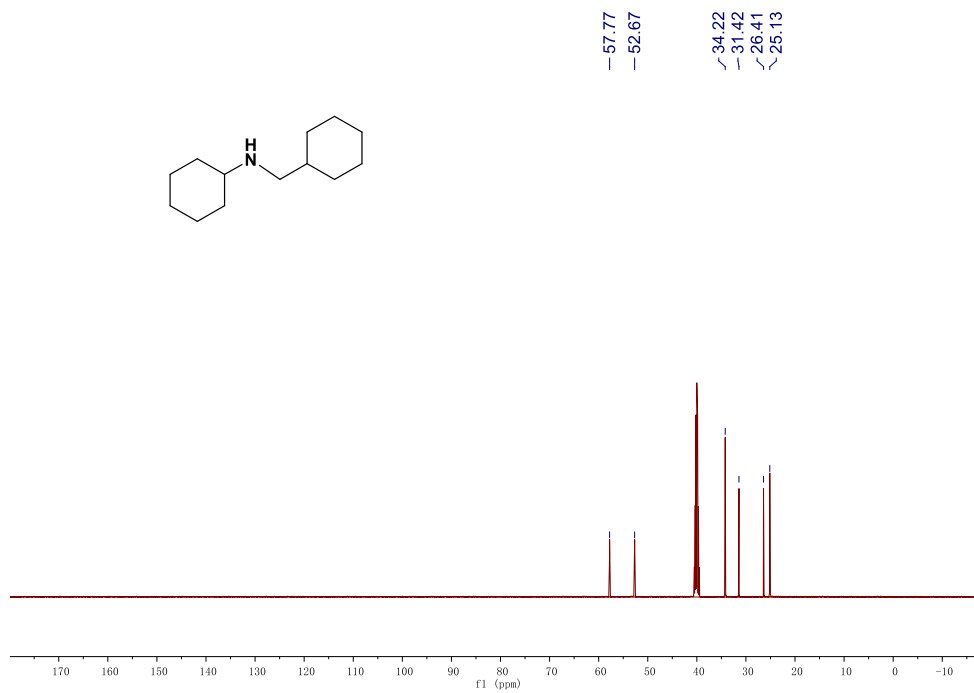

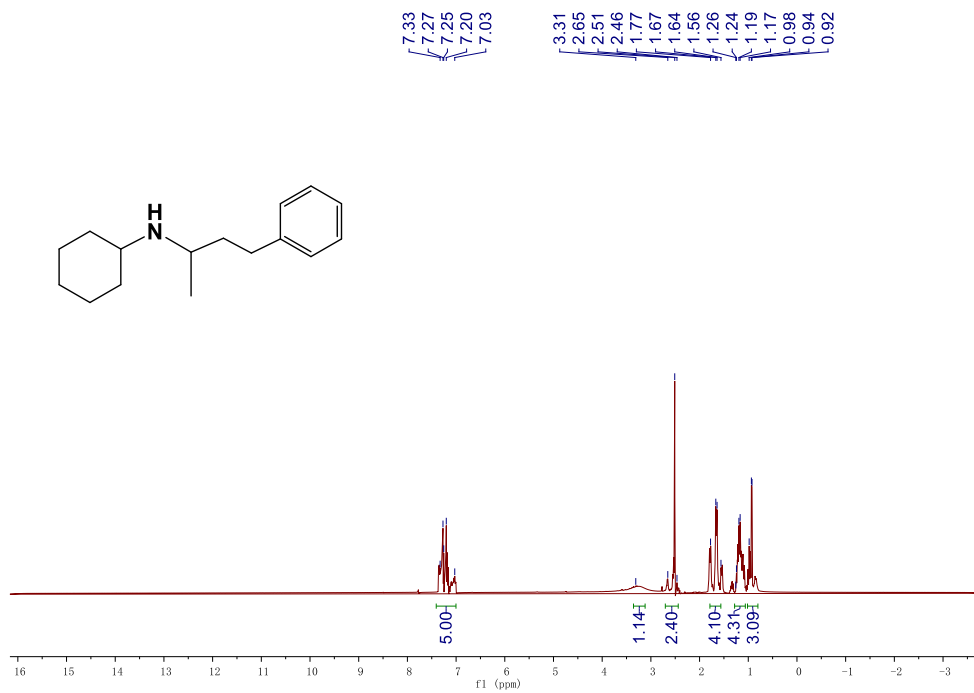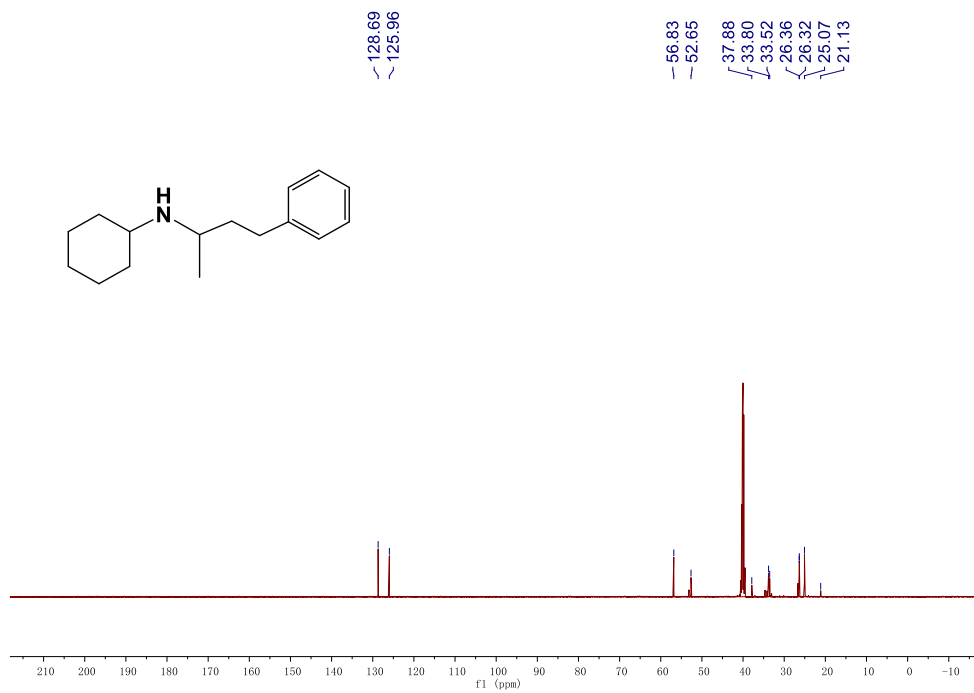

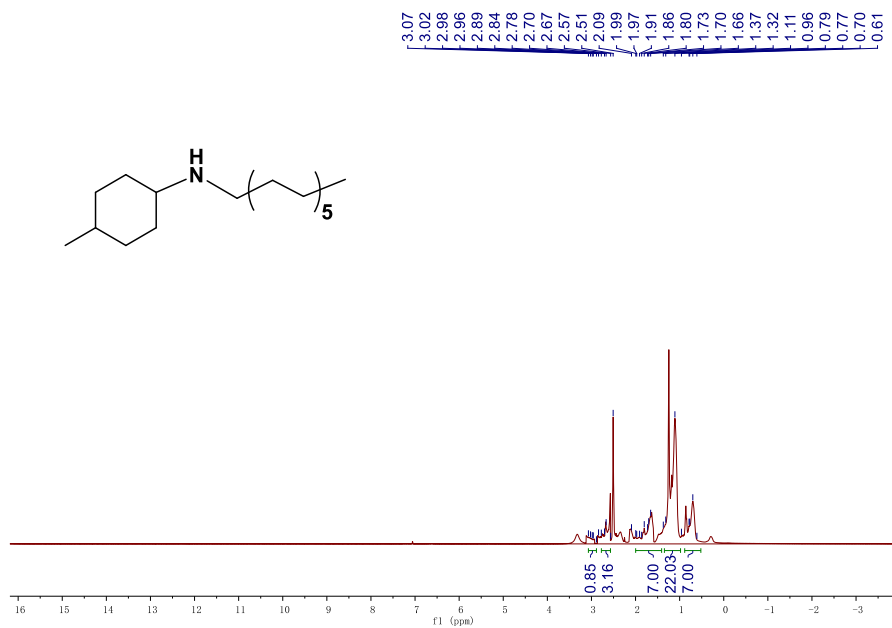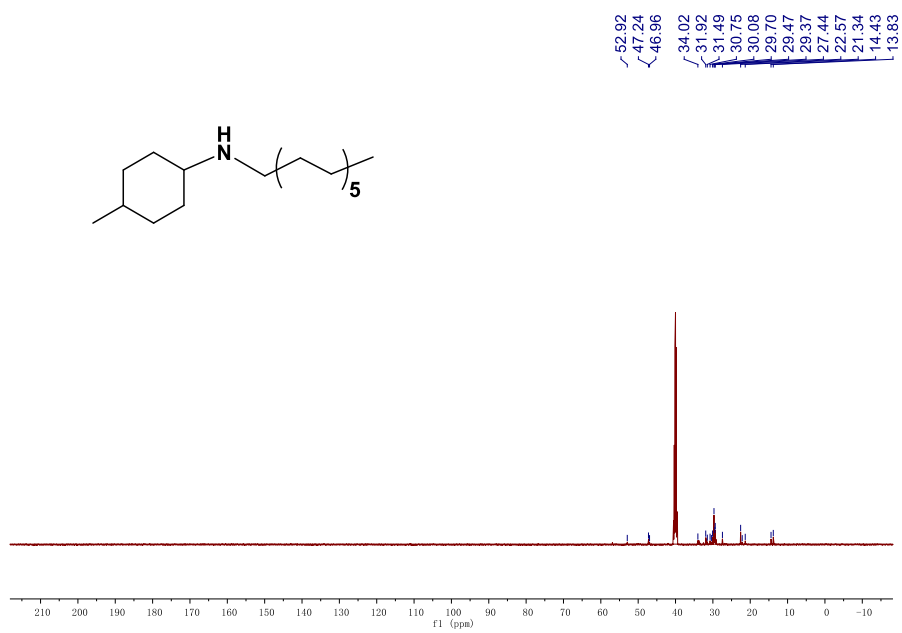

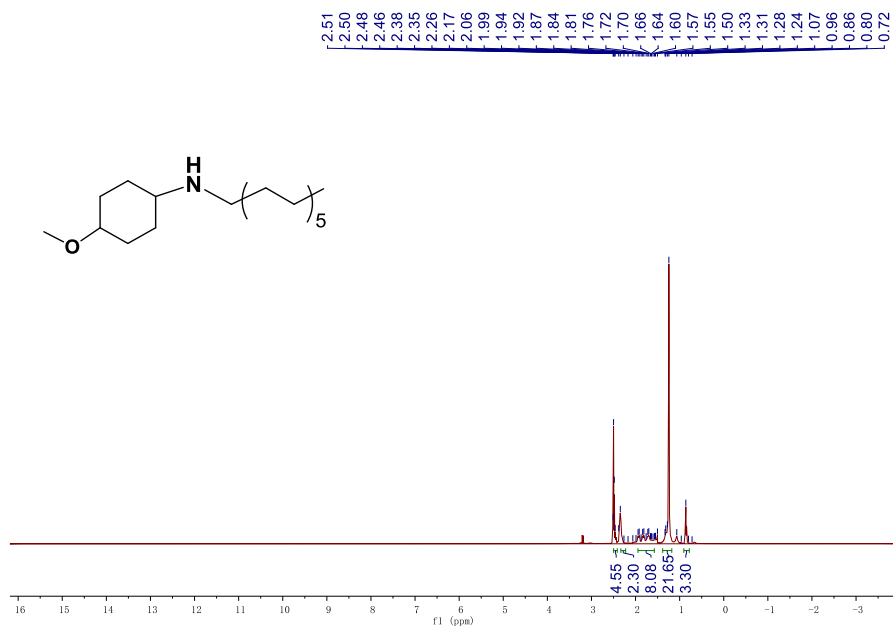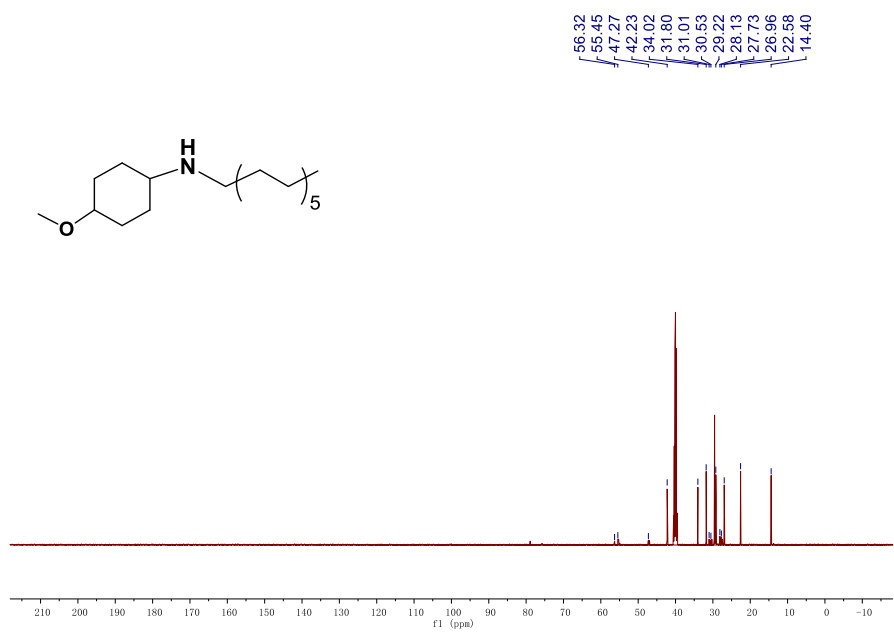

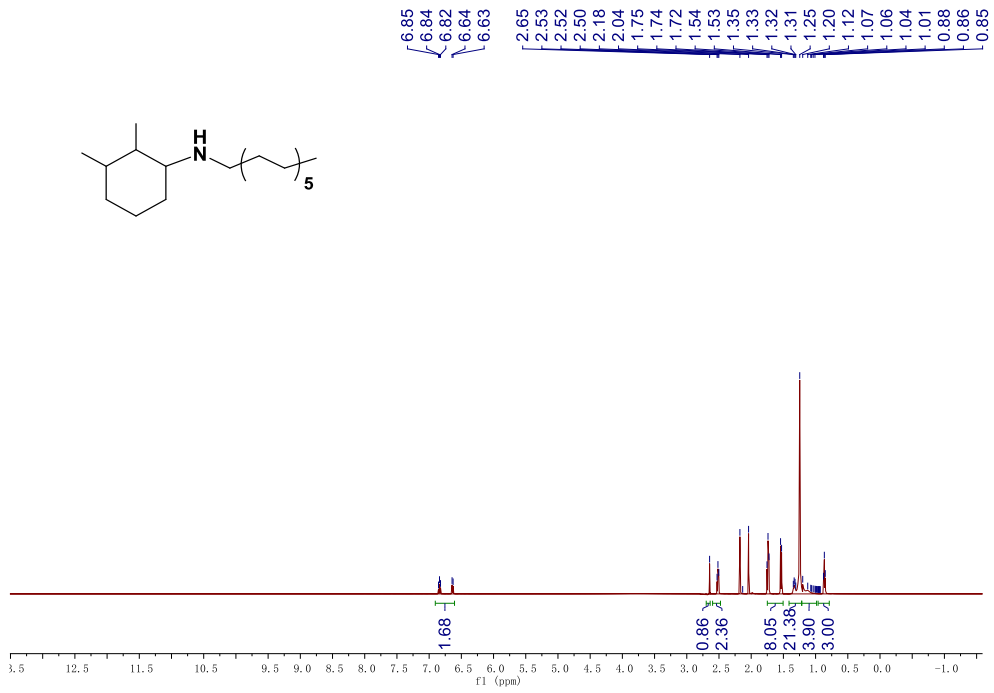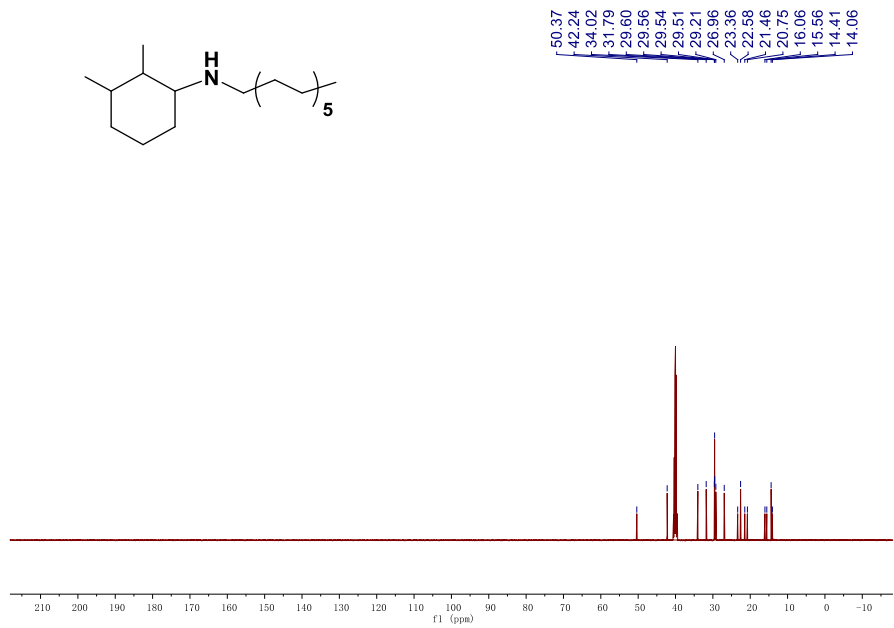

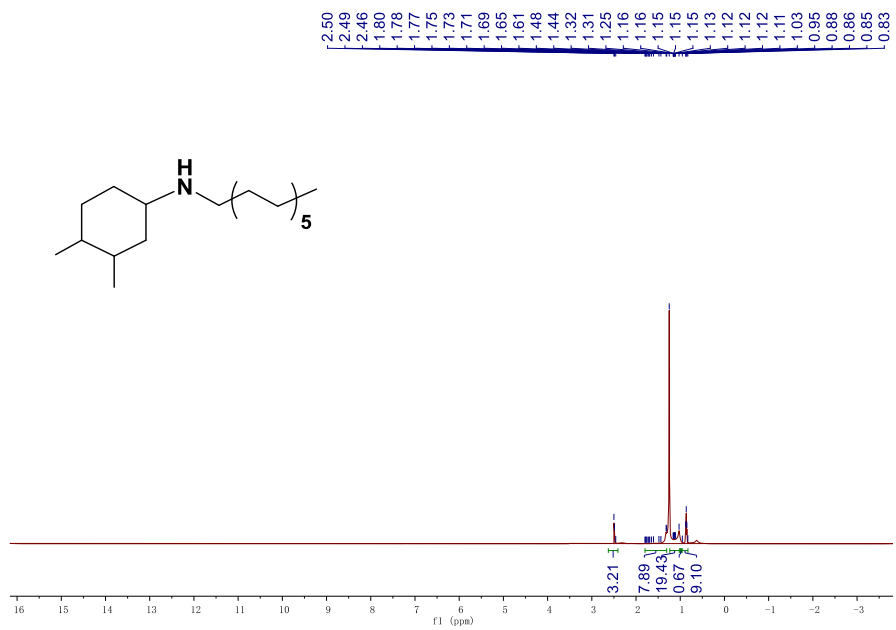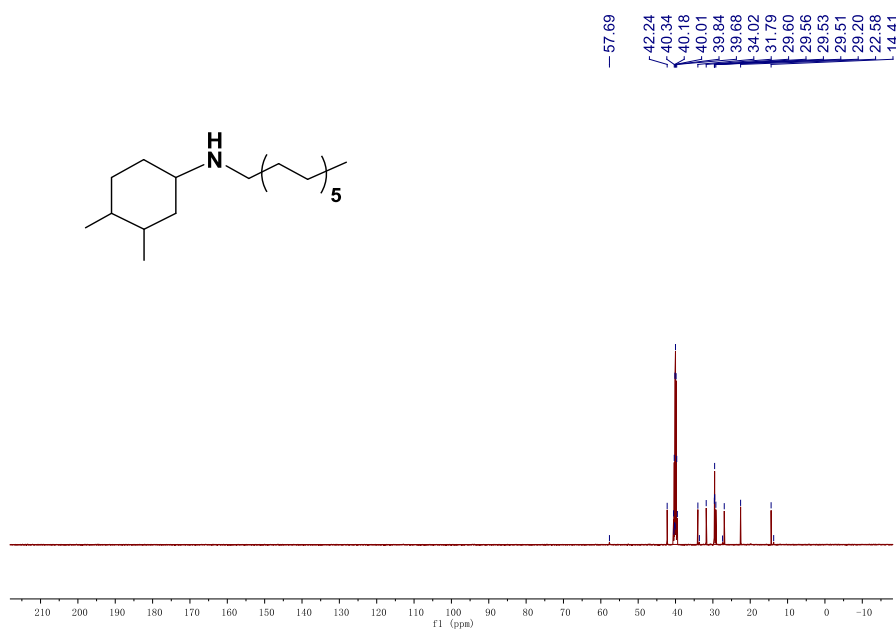

# HR-MS Data.

## HR-MS for compound 3a

### Mass Spectrum SmartFormula Report

|                      |                                          |                       |                      |
|----------------------|------------------------------------------|-----------------------|----------------------|
| <b>Analysis Info</b> |                                          | Acquisition Date      | 2/10/2023 1:16:04 PM |
| Analysis Name        | D:\Data\TJ&YF-20230210\XJ-1_41_01_4882.d | Operator and analyser | ECNU.CHEM. G.D.Yang  |
| Method               | new_tune_low_3min_pos.m                  | Instrument / Ser#     | micrOTOF 10293       |
| Sample Name          | XJ-1                                     |                       |                      |
| Comment              |                                          |                       |                      |

|                              |          |                      |          |                  |           |
|------------------------------|----------|----------------------|----------|------------------|-----------|
| <b>Acquisition Parameter</b> |          |                      |          |                  |           |
| Source Type                  | ESI      | Ion Polarity         | Positive | Set Nebulizer    | 1.5 Bar   |
| Focus                        | Active   |                      |          | Set Dry Heater   | 180 °C    |
| Scan Begin                   | 50 m/z   | Set Capillary        | 4500 V   | Set Dry Gas      | 6.0 l/min |
| Scan End                     | 3000 m/z | Set End Plate Offset | -500 V   | Set Divert Valve | Waste     |

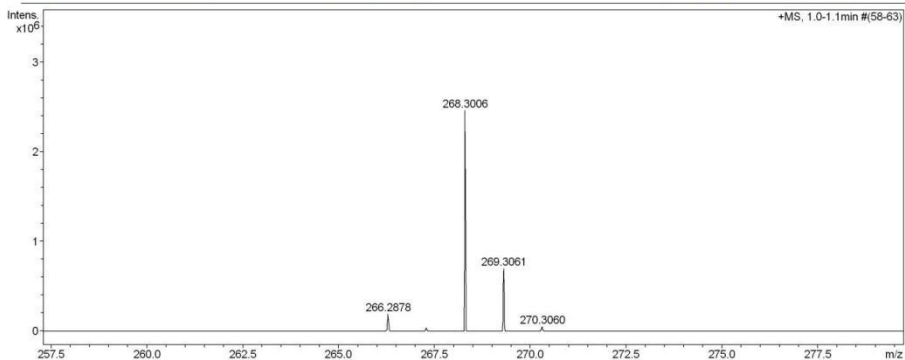

| Meas. m/z | # | Formula     | m/z      | err [ppm] | Mean err [ppm] | rdb | N-Rule | e <sup>-</sup> Conf | mSigma | Std I  | Std Mean m/z | Std I VarNorm | Std m/z Diff | Std Comb Dev |
|-----------|---|-------------|----------|-----------|----------------|-----|--------|---------------------|--------|--------|--------------|---------------|--------------|--------------|
| 268.3006  | 1 | C 18 H 38 N | 268.2999 | -2.5      | -4.3           | 0.5 | ok     | even                | 47.04  | 0.0733 | 0.0015       | 0.0290        | 0.0022       | 0.8427       |

# HR-MS for compound 3b

## Mass Spectrum SmartFormula Report

**Analysis Info**  
 Analysis Name: D:\Data\TJ&YF-20230210\XJ-6\_47\_01\_4888.d  
 Method: new\_tune\_low\_3min\_pos.m  
 Sample Name: XJ-6  
 Comment:  
 Acquisition Date: 2/10/2023 1:43:27 PM  
 Operator and analyser: ECNU.CHEM. G.D.Yang  
 Instrument / Ser#: micrOTOF 10293

**Acquisition Parameter**  
 Source Type: ESI  
 Focus: Active  
 Scan Begin: 50 m/z  
 Scan End: 3000 m/z  
 Ion Polarity: Positive  
 Set Capillary: 4500 V  
 Set End Plate Offset: -500 V  
 Set Nebulizer: 1.5 Bar  
 Set Dry Heater: 180 °C  
 Set Dry Gas: 6.0 l/min  
 Set Divert Valve: Waste

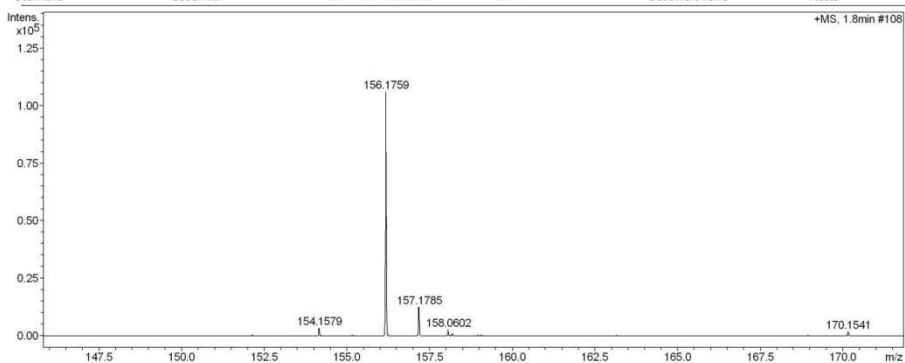

| Meas. m/z | # | Formula                           | m/z      | err [ppm] | Mean err [ppm] | rdb | N-Rule | e <sup>-</sup> Conf | mSigma | Std I  | Std Mean m/z | Std I VarNorm | Std m/z Diff | Std Comb Dev |
|-----------|---|-----------------------------------|----------|-----------|----------------|-----|--------|---------------------|--------|--------|--------------|---------------|--------------|--------------|
| 156.1759  | 1 | C <sub>10</sub> H <sub>22</sub> N | 156.1747 | -8.1      | -7.5           | 0.5 | ok     | even                | 5.11   | 0.0093 | 0.0012       | 0.0052        | 0.0008       | 0.8427       |



# HR-MS for compound 3c

## Mass Spectrum SmartFormula Report

**Analysis Info**  
 Analysis Name: D:\Data\TJ&YF-20230210\XJ-7\_48\_01\_4889.d  
 Method: new\_tune\_low\_3min\_pos.m  
 Sample Name: XJ-7  
 Comment:  
 Acquisition Date: 2/10/2023 1:48:05 PM  
 Operator and analyser: ECNU.CHEM. G.D.Yang  
 Instrument / Ser#: micrOTOF 10293

**Acquisition Parameter**  
 Source Type: ESI  
 Focus: Active  
 Scan Begin: 50 m/z  
 Scan End: 3000 m/z  
 Ion Polarity: Positive  
 Set Capillary: 4500 V  
 Set End Plate Offset: -500 V  
 Set Nebulizer: 1.5 Bar  
 Set Dry Heater: 180 °C  
 Set Dry Gas: 6.0 l/min  
 Set Divert Valve: Waste

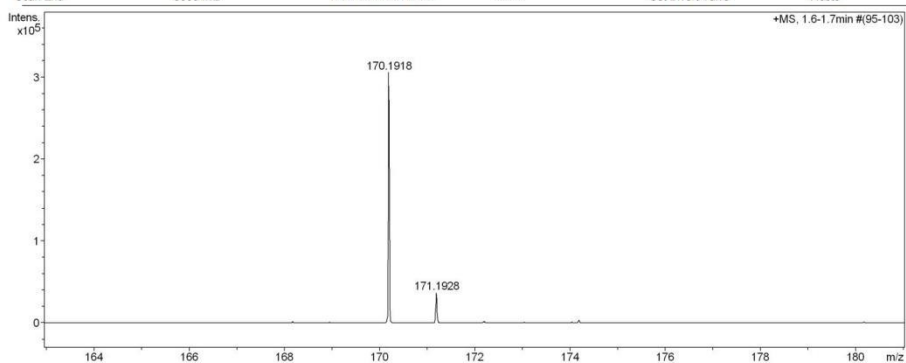

| Meas. m/z | # | Formula                           | m/z      | err [ppm] | Mean err [ppm] | rdB | N-Rule | e <sup>-</sup> Conf | mSigma | Std I  | Std Mean m/z | Std I VarNorm | Std m/z Diff | Std Comb Dev |
|-----------|---|-----------------------------------|----------|-----------|----------------|-----|--------|---------------------|--------|--------|--------------|---------------|--------------|--------------|
| 170.1918  | 1 | C <sub>11</sub> H <sub>24</sub> N | 170.1903 | -8.7      | -7.1           | 0.5 | ok     | even                | 1.47   | 0.0025 | 0.0014       | 0.0012        | 0.0023       | 0.8427       |

# HR-MS for compound 3d

## Mass Spectrum SmartFormula Report

**Analysis Info**  
 Analysis Name: D:\Data\TJ&YF-20230210\XJ-8\_49\_01\_4891.d  
 Method: new\_tune\_low\_3min\_pos.m  
 Sample Name: XJ-6  
 Comment:  
 Acquisition Date: 2/10/2023 1:57:14 PM  
 Operator and analyser: ECNU.CHEM. G.D.Yang  
 Instrument / Ser#: micrOTOF 10293

**Acquisition Parameter**  
 Source Type: ESI  
 Focus: Active  
 Scan Begin: 50 m/z  
 Scan End: 3000 m/z  
 Ion Polarity: Positive  
 Set Capillary: 4500 V  
 Set End Plate Offset: -500 V  
 Set Nebulizer: 1.5 Bar  
 Set Dry Heater: 180 °C  
 Set Dry Gas: 6.0 l/min  
 Set Divert Valve: Waste

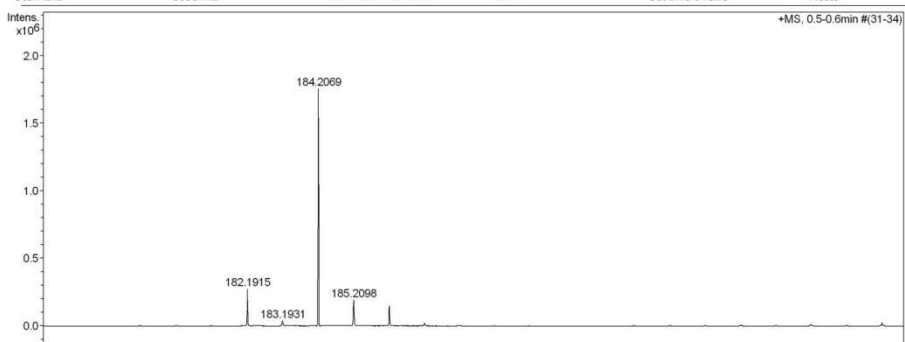

| Meas. m/z | # | Formula                           | m/z      | err [ppm] | Mean err [ppm] | rdb | N-Rule | e <sup>-</sup> Conf | mSigma | Std I  | Std Mean m/z | Std I VarNorm | Std m/z Diff | Std Comb Dev |
|-----------|---|-----------------------------------|----------|-----------|----------------|-----|--------|---------------------|--------|--------|--------------|---------------|--------------|--------------|
| 184.2069  | 1 | C <sub>12</sub> H <sub>26</sub> N | 184.2060 | -5.1      | -7.7           | 0.5 | ok     | even                | 46.78  | 0.0796 | 0.0024       | 0.0550        | 0.0005       | 0.8427       |

# HR-MS for compound 3e

## Mass Spectrum SmartFormula Report

**Analysis Info**  
 Analysis Name: D:\Data\TJ&YF-20230210\XJ-9\_50\_01\_4892.d  
 Method: new\_tune\_low\_3min\_pos.m  
 Sample Name: XJ-9  
 Comment:  
 Acquisition Date: 2/10/2023 2:01:52 PM  
 Operator and analyser: ECNU.CHEM. G.D.Yang  
 Instrument / Ser#: micrOTOF 10293

**Acquisition Parameter**  
 Source Type: ESI  
 Focus: Active  
 Scan Begin: 50 m/z  
 Scan End: 3000 m/z  
 Ion Polarity: Positive  
 Set Capillary: 4500 V  
 Set End Plate Offset: -500 V  
 Set Nebulizer: 1.5 Bar  
 Set Dry Heater: 180 °C  
 Set Dry Gas: 6.0 l/min  
 Set Divert Valve: Waste

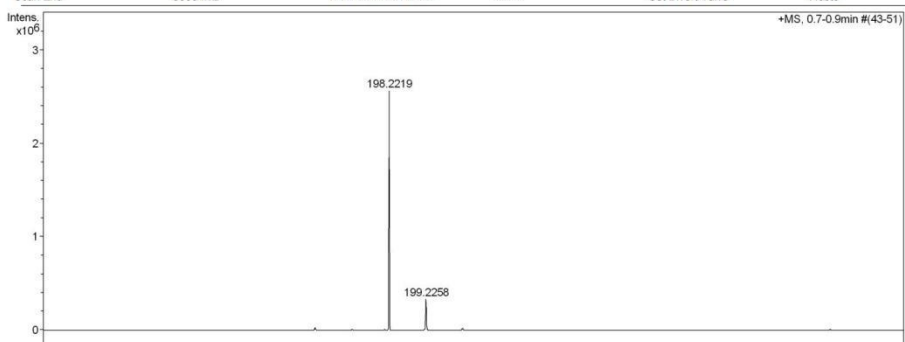

| Meas. m/z | # | Formula                           | m/z      | err [ppm] | Mean err [ppm] | rdB | N-Rule | e <sup>-</sup> Conf | mSigma | Std I  | Std Mean m/z | Std I VarNorm | Std m/z Diff | Std Comb Dev |
|-----------|---|-----------------------------------|----------|-----------|----------------|-----|--------|---------------------|--------|--------|--------------|---------------|--------------|--------------|
| 198.2219  | 1 | C <sub>13</sub> H <sub>28</sub> N | 198.2216 | -1.2      | -1.4           | 0.5 | ok     | even                | 8.16   | 0.0160 | 0.0004       | 0.0065        | 0.0006       | 0.8427       |

# HR-MS for compound 3f

## Mass Spectrum SmartFormula Report

**Analysis Info**  
 Analysis Name: D:\Data\TJ&YF-20230210\XJ-10\_51\_01\_4893.d  
 Method: new\_tune\_low\_3min\_pos.m  
 Sample Name: XJ-10  
 Comment:  
 Acquisition Date: 2/10/2023 2:06:23 PM  
 Operator and analyser: ECNU.CHEM. G.D.Yang  
 Instrument / Ser#: micrOTOF 10293

**Acquisition Parameter**  
 Source Type: ESI  
 Focus: Active  
 Scan Begin: 50 m/z  
 Scan End: 3000 m/z  
 Ion Polarity: Positive  
 Set Capillary: 4500 V  
 Set End Plate Offset: -500 V  
 Set Nebulizer: 1.5 Bar  
 Set Dry Heater: 180 °C  
 Set Dry Gas: 6.0 l/min  
 Set Divert Valve: Waste

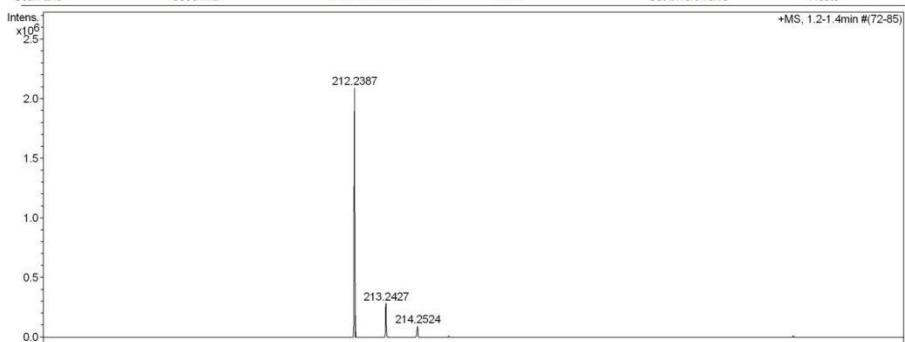

| Meas. m/z | # | Formula                           | m/z      | err [ppm] | Mean err [ppm] | rdb | N-Rule | e <sup>-</sup> Conf | mSigma | Std I  | Std Mean m/z | Std I VarNorm | Std m/z Diff | Std Comb Dev |
|-----------|---|-----------------------------------|----------|-----------|----------------|-----|--------|---------------------|--------|--------|--------------|---------------|--------------|--------------|
| 212.2387  | 1 | C <sub>14</sub> H <sub>30</sub> N | 212.2373 | -6.9      | -8.5           | 0.5 | ok     | even                | 22.96  | 0.0362 | 0.0023       | 0.0257        | 0.0006       | 0.8427       |

# HR-MS for compound 3g

## Mass Spectrum SmartFormula Report

| Analysis Info         |                                           | Acquisition Date      |            | 2/10/2023 2:11:00 PM |           |
|-----------------------|-------------------------------------------|-----------------------|------------|----------------------|-----------|
| Analysis Name         | D:\Data\TJ&YF-20230210\XJ-11_52_01_4894.d | Operator and analyser | ECNU.CHEM. | G.D.Yang             |           |
| Method                | new_tune_low_3min_pos.m                   | Instrument / Ser#     | micrOTOF   | 10293                |           |
| Sample Name           | XJ-11                                     |                       |            |                      |           |
| Comment               |                                           |                       |            |                      |           |
| Acquisition Parameter |                                           |                       |            |                      |           |
| Source Type           | ESI                                       | Ion Polarity          | Positive   | Set Nebulizer        | 1.5 Bar   |
| Focus                 | Active                                    | Set Capillary         | 4500 V     | Set Dry Heater       | 180 °C    |
| Scan Begin            | 50 m/z                                    | Set End Plate Offset  | -500 V     | Set Dry Gas          | 6.0 l/min |
| Scan End              | 3000 m/z                                  |                       |            | Set Divert Valve     | Waste     |

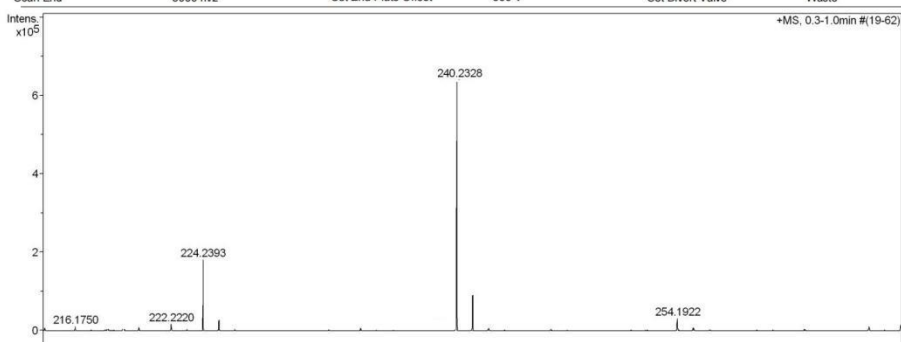

| Meas. m/z | # | Formula     | m/z      | err [ppm] | Mean err [ppm] | rdb | N-Rule | e <sup>-</sup> Conf | mSigma | Std I  | Std Mean m/z | Std I VarNorm | Std m/z Diff | Std Comb Dev |
|-----------|---|-------------|----------|-----------|----------------|-----|--------|---------------------|--------|--------|--------------|---------------|--------------|--------------|
| 240.2328  | 1 | C 16 H 34 N | 240.2999 | -2.5      | -4.3           | 0.5 | ok     | even                | 47.04  | 0.0733 | 0.0015       | 0.0290        | 0.0022       | 0.8427       |

Bruker Compass DataAnalysis 4.0

printed: 5 2/10/2023 2:50:39 PM

Page 1 of 1

# HR-MS for compound 3h

## Mass Spectrum SmartFormula Report

**Analysis Info**  
 Analysis Name: D:\Data\TJ&YF-20230210\XJ-12\_53\_01\_4895.d  
 Method: new\_tune\_low\_3min\_pos.m  
 Sample Name: XJ-12  
 Comment:  
 Acquisition Date: 2/10/2023 2:15:34 PM  
 Operator and analyser: ECNU.CHEM. G.D.Yang  
 Instrument / Ser#: micrOTOF 10293

**Acquisition Parameter**  
 Source Type: ESI  
 Focus: Active  
 Scan Begin: 50 m/z  
 Scan End: 3000 m/z  
 Ion Polarity: Positive  
 Set Capillary: 4500 V  
 Set End Plate Offset: -500 V  
 Set Nebulizer: 1.5 Bar  
 Set Dry Heater: 180 °C  
 Set Dry Gas: 6.0 l/min  
 Set Divert Valve: Waste

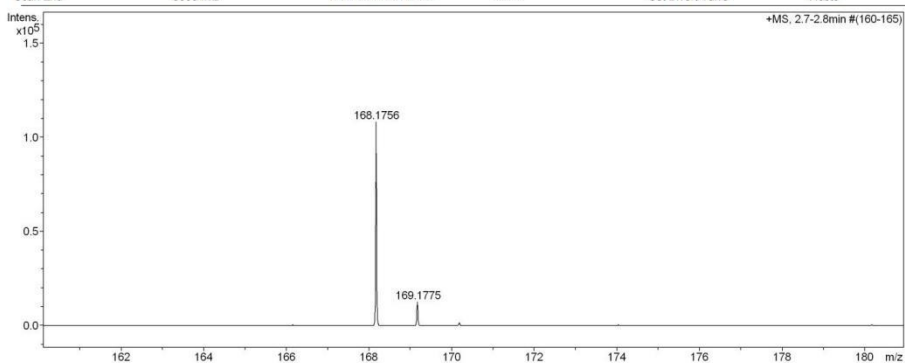

| Meas. m/z | # | Formula     | m/z      | err [ppm] | Mean err [ppm] | rdb | N-Rule | Conf | mSigma | Std I  | Std Mean m/z | Std I VarNorm | Std m/z Diff | Std Comb Dev |
|-----------|---|-------------|----------|-----------|----------------|-----|--------|------|--------|--------|--------------|---------------|--------------|--------------|
| 168.1756  | 1 | C 11 H 22 N | 168.1747 | -5.5      | -4.9           | 1.5 | ok     | even | 5.97   | 0.0093 | 0.0010       | 0.0065        | 0.0014       | 0.8427       |

# HR-MS for compound 3i

## Mass Spectrum SmartFormula Report

**Analysis Info**  
 Analysis Name: D:\Data\TJ&YF-20230210\XJ-13\_54\_01\_4898.d  
 Method: new\_tune\_low\_3min\_pos.m  
 Sample Name: XJ-13  
 Comment:  
 Acquisition Date: 2/10/2023 2:29:17 PM  
 Operator and analyser: ECNU.CHEM. G.D.Yang  
 Instrument / Ser#: micrOTOF 10293

**Acquisition Parameter**  
 Source Type: ESI  
 Focus: Active  
 Scan Begin: 50 m/z  
 Scan End: 3000 m/z  
 Ion Polarity: Positive  
 Set Capillary: 4500 V  
 Set End Plate Offset: -500 V  
 Set Nebulizer: 1.5 Bar  
 Set Dry Heater: 180 °C  
 Set Dry Gas: 6.0 l/min  
 Set Divert Valve: Waste

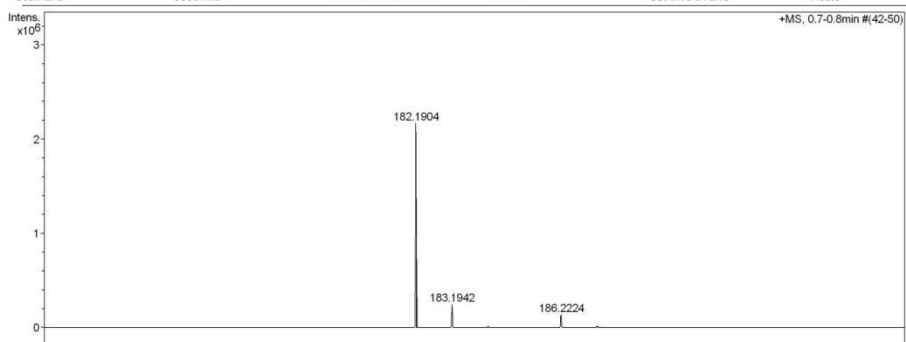

| Meas. m/z | # | Formula     | m/z      | err [ppm] | Mean err [ppm] | rdb | N-Rule | e <sup>-</sup> Conf | mSigma | Std I  | Std Mean m/z | Std I VarNorm | Std m/z Diff | Std Comb Dev |
|-----------|---|-------------|----------|-----------|----------------|-----|--------|---------------------|--------|--------|--------------|---------------|--------------|--------------|
| 182.1904  | 1 | C 12 H 24 N | 182.1903 | -0.6      | -0.8           | 1.5 | ok     | even                | 11.09  | 0.0216 | 0.0002       | 0.0089        | 0.0004       | 0.8427       |

# HR-MS for compound 3j

## Mass Spectrum SmartFormula Report

**Analysis Info**  
 Analysis Name: D:\Data\TJ&YF-20230210\XJ-14\_55\_01\_4899.d  
 Method: new\_tune\_low\_3min\_pos.m  
 Sample Name: XJ-14  
 Comment:  
 Acquisition Date: 2/10/2023 2:33:51 PM  
 Operator and analyser: ECNU.CHEM. G.D.Yang  
 Instrument / Ser#: micrOTOF 10293

**Acquisition Parameter**  
 Source Type: ESI  
 Focus: Active  
 Scan Begin: 50 m/z  
 Scan End: 3000 m/z  
 Ion Polarity: Positive  
 Set Capillary: 4500 V  
 Set End Plate Offset: -500 V  
 Set Nebulizer: 1.5 Bar  
 Set Dry Heater: 180 °C  
 Set Dry Gas: 6.0 l/min  
 Set Divert Valve: Waste

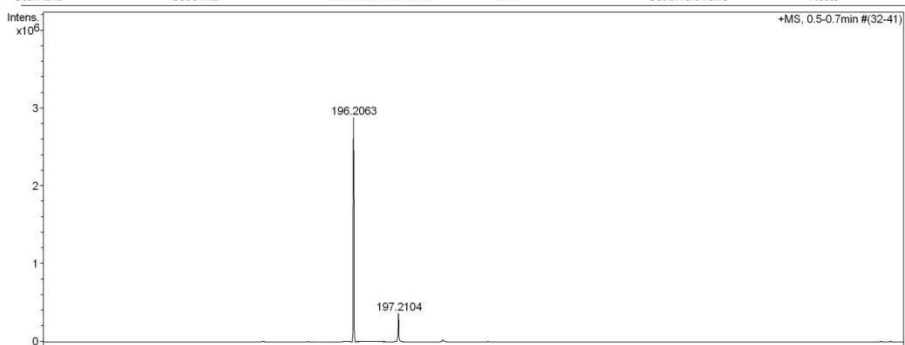

| Meas. m/z | # | Formula                           | m/z      | err [ppm] | Mean err [ppm] | rdb | N-Rule | e <sup>-</sup> Conf | mSigma | Std I  | Std Mean m/z | Std I VarNorm | Std m/z Diff | Std Comb Dev |
|-----------|---|-----------------------------------|----------|-----------|----------------|-----|--------|---------------------|--------|--------|--------------|---------------|--------------|--------------|
| 196.2063  | 1 | C <sub>13</sub> H <sub>26</sub> N | 196.2060 | -1.9      | -2.2           | 1.5 | ok     | even                | 11.35  | 0.0224 | 0.0006       | 0.0091        | 0.0007       | 0.8427       |



# HR-MS for compound 3k

## Mass Spectrum SmartFormula Report

**Analysis Info**  
 Analysis Name: D:\Data\TJ&YF-20230210\XJ-15\_56\_01\_4900.d  
 Method: new\_tune\_low\_3min\_pos.m  
 Sample Name: XJ-15  
 Comment:  
 Acquisition Date: 2/10/2023 2:38:27 PM  
 Operator and analyser: ECNU.CHEM. G.D.Yang  
 Instrument / Ser#: micrOTOF 10293

**Acquisition Parameter**  
 Source Type: ESI  
 Focus: Active  
 Scan Begin: 50 m/z  
 Scan End: 3000 m/z  
 Ion Polarity: Positive  
 Set Capillary: 4500 V  
 Set End Plate Offset: -500 V  
 Set Nebulizer: 1.5 Bar  
 Set Dry Heater: 180 °C  
 Set Dry Gas: 6.0 l/min  
 Set Divert Valve: Waste

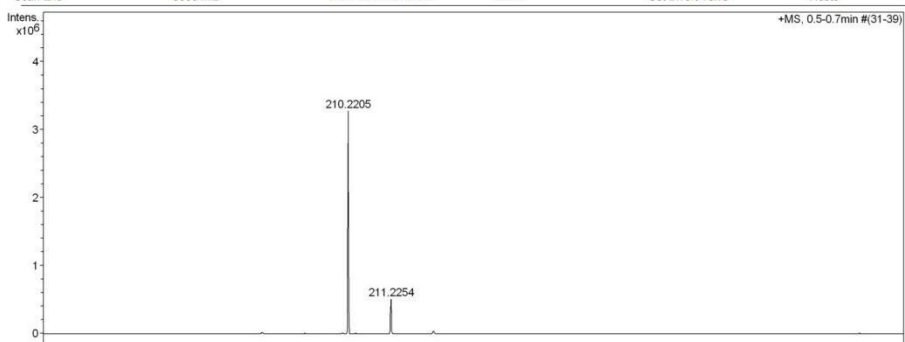

| Meas. m/z | # | Formula                           | m/z      | err [ppm] | Mean err [ppm] | rdb | N-Rule | e <sup>-</sup> Conf | mSigma | Std I  | Std Mean m/z | Std I VarNorm | Std m/z Diff | Std Comb Dev |
|-----------|---|-----------------------------------|----------|-----------|----------------|-----|--------|---------------------|--------|--------|--------------|---------------|--------------|--------------|
| 210.2205  | 1 | C <sub>14</sub> H <sub>28</sub> N | 210.2216 | 5.5       | 4.6            | 1.5 | ok     | even                | 0.63   | 0.0009 | 0.0011       | 0.0006        | 0.0016       | 0.8427       |

# HR-MS for compound 31

## Mass Spectrum SmartFormula Report

| Analysis Info         |                                           | Acquisition Date      |                     |
|-----------------------|-------------------------------------------|-----------------------|---------------------|
| Analysis Name         | D:\Data\TJ&YF-20230210\XJ-16_57_01_4901.d | 2/10/2023 2:43:04 PM  |                     |
| Method                | new_tune_low_3min_pos.m                   | Operator and analyser | ECNU.CHEM. G.D.Yang |
| Sample Name           | XJ-16                                     | Instrument / Ser#     | micrOTOF 10293      |
| Comment               |                                           |                       |                     |
| Acquisition Parameter |                                           |                       |                     |
| Source Type           | ESI                                       | Ion Polarity          | Positive            |
| Focus                 | Active                                    | Set Nebulizer         | 1.5 Bar             |
| Scan Begin            | 50 m/z                                    | Set Dry Heater        | 180 °C              |
| Scan End              | 3000 m/z                                  | Set Capillary         | 4500 V              |
|                       |                                           | Set End Plate Offset  | -500 V              |
|                       |                                           | Set Dry Gas           | 6.0 l/min           |
|                       |                                           | Set Divert Valve      | Waste               |

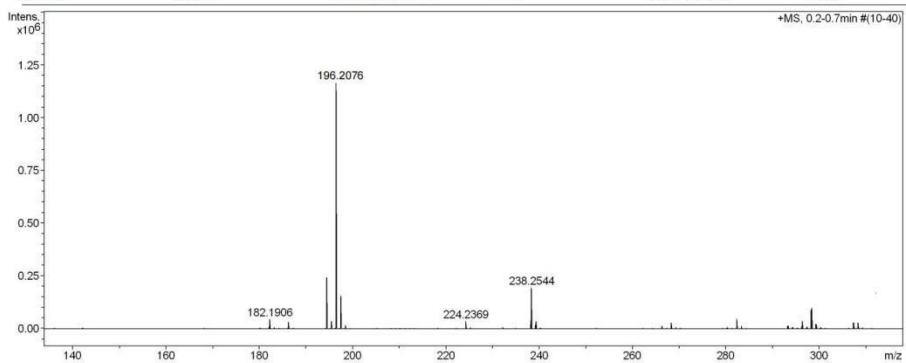

| Meas. m/z | # | Formula     | m/z      | err [ppm] | Mean err [ppm] | rdb | N-Rule | e <sup>-</sup> Conf | mSigma | Std I  | Std Mean m/z | Std I VarNorm | Std m/z Diff | Std Comb Dev |
|-----------|---|-------------|----------|-----------|----------------|-----|--------|---------------------|--------|--------|--------------|---------------|--------------|--------------|
| 196.2076  | 1 | C 13 H 26 N | 196.2060 | -7.2      | -5.4           | 4.5 | ok     | even                | 2.47   | 0.0036 | 0.0016       | 0.0022        | 0.0025       | 0.4646       |

Bruker Compass DataAnalysis 4.0

printed: 5 2/10/2023 3:01:07 PM

Page1 of 1

# HR-MS for compound 3m

## Mass Spectrum SmartFormula Report

| Analysis Info         |                                           | Acquisition Date      |            | 2/10/2023 2:47:43 PM |           |
|-----------------------|-------------------------------------------|-----------------------|------------|----------------------|-----------|
| Analysis Name         | D:\Data\TJ&YF-20230210\XJ-17_58_01_4902.d | Operator and analyser | ECNU.CHEM. | G.D.Yang             |           |
| Method                | new_tune_low_3min_pos.m                   | Instrument / Ser#     | micrOTOF   | 10293                |           |
| Sample Name           | XJ-17                                     |                       |            |                      |           |
| Comment               |                                           |                       |            |                      |           |
| Acquisition Parameter |                                           |                       |            |                      |           |
| Source Type           | ESI                                       | Ion Polarity          | Positive   | Set Nebulizer        | 1.5 Bar   |
| Focus                 | Active                                    | Set Capillary         | 4500 V     | Set Dry Heater       | 180 °C    |
| Scan Begin            | 50 m/z                                    | Set End Plate Offset  | -500 V     | Set Dry Gas          | 6.0 l/min |
| Scan End              | 3000 m/z                                  |                       |            | Set Divert Valve     | Waste     |

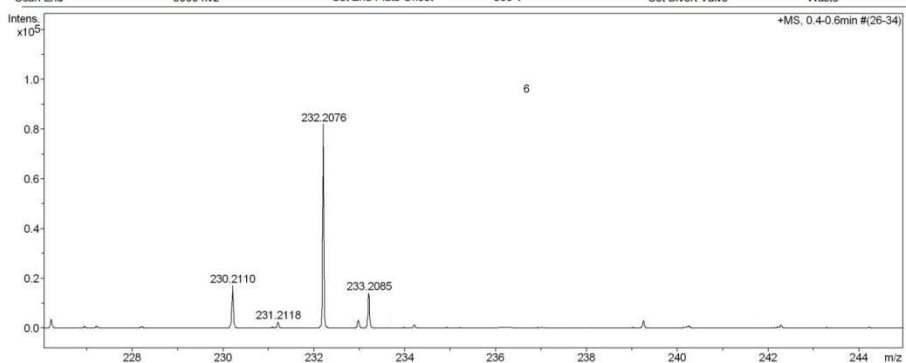

| Meas. m/z | # | Formula                           | m/z      | err [ppm] | Mean err [ppm] | rdb | N-Rule | e <sup>-</sup> Conf | mSigma | Std I  | Std Mean m/z | Std I VarNorm | Std m/z Diff | Std Comb Dev |
|-----------|---|-----------------------------------|----------|-----------|----------------|-----|--------|---------------------|--------|--------|--------------|---------------|--------------|--------------|
| 232.2076  | 1 | C <sub>16</sub> H <sub>26</sub> N | 232.2060 | -7.2      | -5.4           | 4.5 | ok     | even                | 2.47   | 0.0036 | 0.0016       | 0.0022        | 0.0025       | 0.4646       |

# HR-MS for compound 3n

## Mass Spectrum SmartFormula Report

**Analysis Info**  
 Analysis Name: D:\Data\TJ&YF-20230210\XJ-2\_42\_01\_4883.d  
 Method: new\_tune\_low\_3min\_pos.m  
 Sample Name: XJ-2  
 Comment:  
 Acquisition Date: 2/10/2023 1:20:36 PM  
 Operator and analyser: ECNU.CHEM. G.D.Yang  
 Instrument / Ser#: micrOTOF 10293

**Acquisition Parameter**  
 Source Type: ESI  
 Focus: Active  
 Scan Begin: 50 m/z  
 Scan End: 3000 m/z  
 Ion Polarity: Positive  
 Set Capillary: 4500 V  
 Set End Plate Offset: -500 V  
 Set Nebulizer: 1.5 Bar  
 Set Dry Heater: 180 °C  
 Set Dry Gas: 6.0 l/min  
 Set Divert Valve: Waste

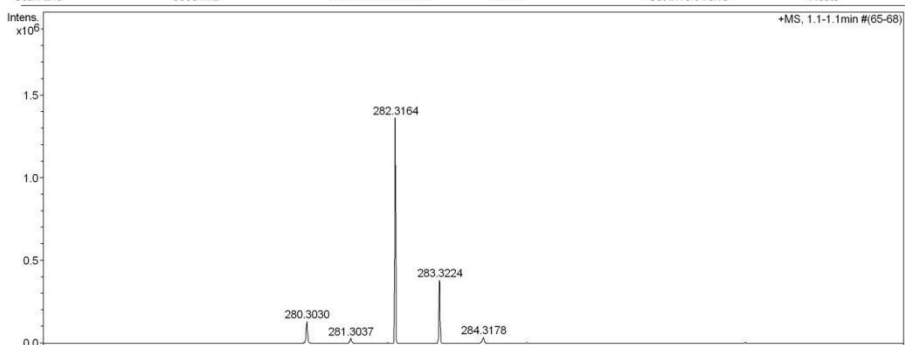

| Meas. m/z | # | Formula                           | m/z      | err [ppm] | Mean err [ppm] | rdb | N-Rule | e <sup>-</sup> Conf | mSigma | Std I  | Std Mean m/z | Std I VarNorm | Std m/z Diff | Std Comb Dev |
|-----------|---|-----------------------------------|----------|-----------|----------------|-----|--------|---------------------|--------|--------|--------------|---------------|--------------|--------------|
| 282.3164  | 1 | C <sub>19</sub> H <sub>40</sub> N | 282.3155 | -3.0      | -4.6           | 0.5 | ok     | even                | 38.14  | 0.0602 | 0.0019       | 0.0238        | 0.0027       | 0.8427       |

# HR-MS for compound 3o

## Mass Spectrum SmartFormula Report

**Analysis Info**  
 Analysis Name: D:\Data\TJ&YF-20230210\XJ-3\_43\_01\_4920.d  
 Method: new\_tune\_low\_3min\_pos.m  
 Sample Name: XJ-3  
 Comment:  
 Acquisition Date: 2/10/2023 4:10:56 PM  
 Operator and analyser: ECNU.CHEM. G.D.Yang  
 Instrument / Ser#: micrOTOF 10293

**Acquisition Parameter**  
 Source Type: ESI  
 Focus: Active  
 Scan Begin: 50 m/z  
 Scan End: 3000 m/z  
 Ion Polarity: Positive  
 Set Capillary: 4500 V  
 Set End Plate Offset: -500 V  
 Set Nebulizer: 1.5 Bar  
 Set Dry Heater: 180 °C  
 Set Dry Gas: 6.0 l/min  
 Set Divert Valve: Waste

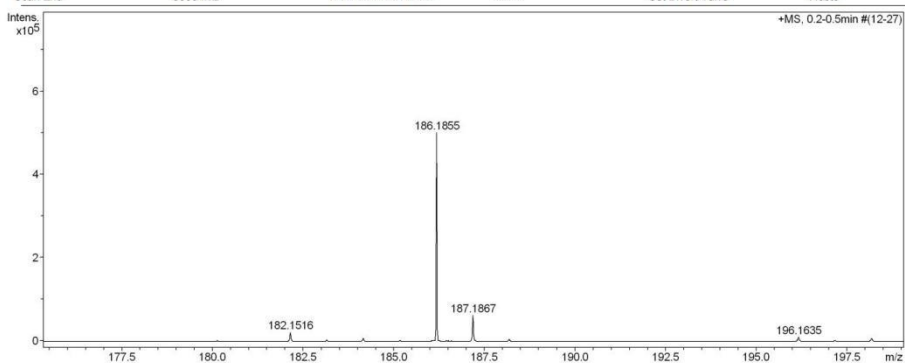

| Meas. m/z | # | Formula                                          | m/z      | err [ppm] | Mean err [ppm] | rdb | N-Rule | e <sup>-</sup> Conf | mSigma | Std I  | Std Mean m/z | Std I VarNorm | Std m/z Diff | Std Comb Dev |
|-----------|---|--------------------------------------------------|----------|-----------|----------------|-----|--------|---------------------|--------|--------|--------------|---------------|--------------|--------------|
| 186.1855  | 1 | C <sub>11</sub> H <sub>24</sub> N <sub>2</sub> O | 186.1852 | -1.5      | -0.0           | 0.5 | ok     | even                | 1.23   | 0.0029 | 0.0008       | 0.0014        | 0.0022       | 0.8427       |

# HR-MS for compound 3p

## Mass Spectrum SmartFormula Report

**Analysis Info**  
 Analysis Name: D:\Data\TJ&YF-20230210\XJ-8\_49\_01\_4891.d  
 Method: new\_tune\_low\_3min\_pos.m  
 Sample Name: XJ-4  
 Comment:  
 Acquisition Date: 2/10/2023 1:17:14 PM  
 Operator and analyser: ECNU.CHEM. G.D.Yang  
 Instrument / Ser#: micrOTOF 10293

**Acquisition Parameter**  
 Source Type: ESI  
 Focus: Active  
 Scan Begin: 50 m/z  
 Scan End: 3000 m/z  
 Ion Polarity: Positive  
 Set Capillary: 4500 V  
 Set End Plate Offset: -500 V  
 Set Nebulizer: 1.5 Bar  
 Set Dry Heater: 180 °C  
 Set Dry Gas: 6.0 l/min  
 Set Divert Valve: Waste



| Meas. m/z | # | Formula                           | m/z      | err [ppm] | Mean err [ppm] | rdb | N-Rule | e <sup>-</sup> Conf | mSigma | Std I  | Std Mean m/z | Std I VarNorm | Std m/z Diff | Std Comb Dev |
|-----------|---|-----------------------------------|----------|-----------|----------------|-----|--------|---------------------|--------|--------|--------------|---------------|--------------|--------------|
| 184.2069  | 1 | C <sub>12</sub> H <sub>26</sub> N | 184.2060 | -5.1      | -7.7           | 0.5 | ok     | even                | 46.78  | 0.0796 | 0.0024       | 0.0550        | 0.0005       | 0.8427       |

# HR-MS for compound 3q

## Mass Spectrum SmartFormula Report

|                      |                                          |                       |                      |          |
|----------------------|------------------------------------------|-----------------------|----------------------|----------|
| <b>Analysis Info</b> |                                          | Acquisition Date      | 2/10/2023 1:57:14 PM |          |
| Analysis Name        | D:\Data\TJ&YF-20230210\XJ-8_49_01_4891.d | Operator and analyser | ECNU.CHEM.           | G.D.Yang |
| Method               | new_tune_low_3min_pos.m                  | Instrument / Ser#     | micrOTOF             | 10293    |
| Sample Name          | XJ-5                                     |                       |                      |          |
| Comment              |                                          |                       |                      |          |

|                              |          |                      |          |                  |           |
|------------------------------|----------|----------------------|----------|------------------|-----------|
| <b>Acquisition Parameter</b> |          |                      |          |                  |           |
| Source Type                  | ESI      | Ion Polarity         | Positive | Set Nebulizer    | 1.5 Bar   |
| Focus                        | Active   |                      |          | Set Dry Heater   | 180 °C    |
| Scan Begin                   | 50 m/z   | Set Capillary        | 4500 V   | Set Dry Gas      | 6.0 l/min |
| Scan End                     | 3000 m/z | Set End Plate Offset | -500 V   | Set Divert Valve | Waste     |

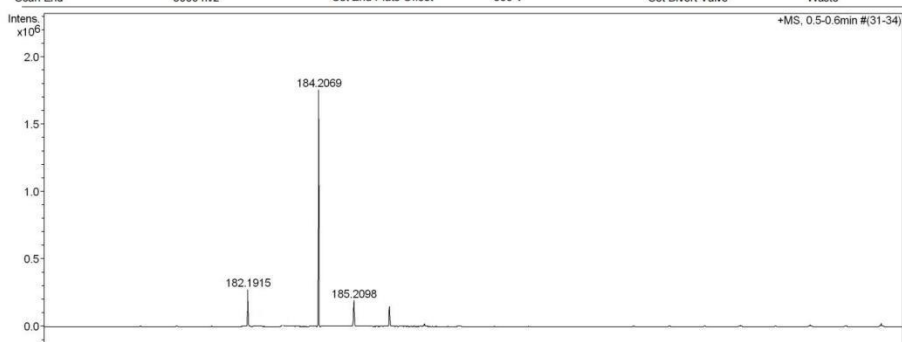

| Meas. m/z | # | Formula                           | m/z      | err [ppm] | Mean err [ppm] | rdb | N-Rule | e <sup>-</sup> Conf | mSigma | Std I  | Std Mean m/z | Std I VarNorm | Std m/z Diff | Std Comb Dev |
|-----------|---|-----------------------------------|----------|-----------|----------------|-----|--------|---------------------|--------|--------|--------------|---------------|--------------|--------------|
| 184.2069  | 1 | C <sub>12</sub> H <sub>26</sub> N | 184.2060 | -5.1      | -7.7           | 0.5 | ok     | even                | 46.78  | 0.0796 | 0.0024       | 0.0550        | 0.0005       | 0.8427       |

## Chromatograms for GC-measurements

### Reaction 1

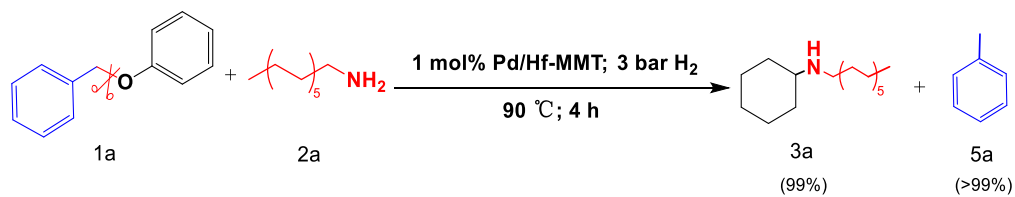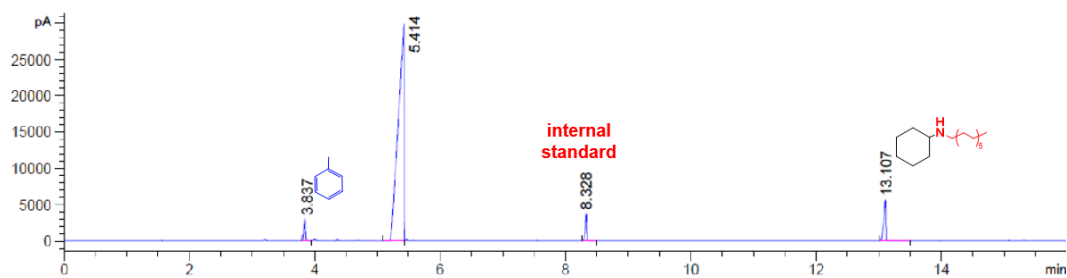

### Reaction 2

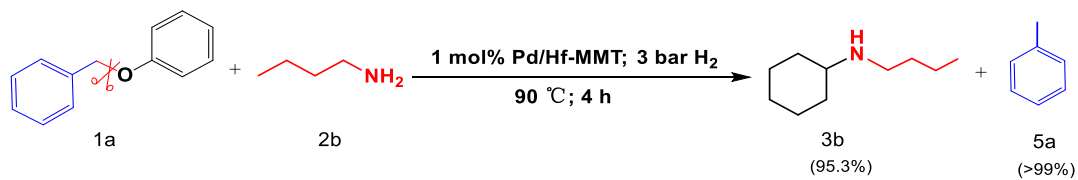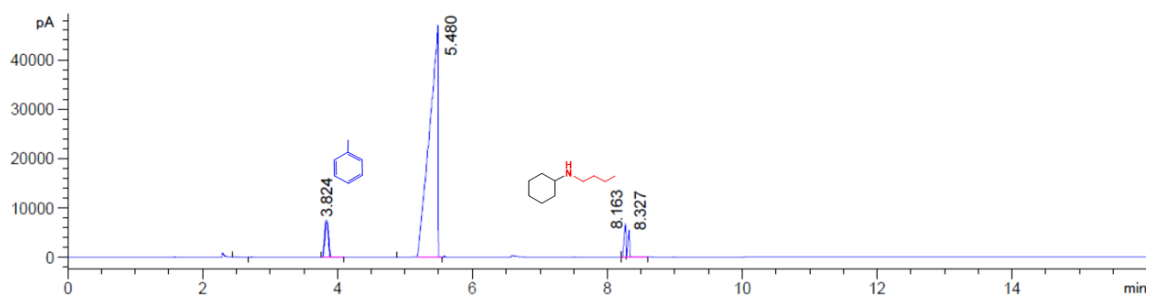



### Reaction 3

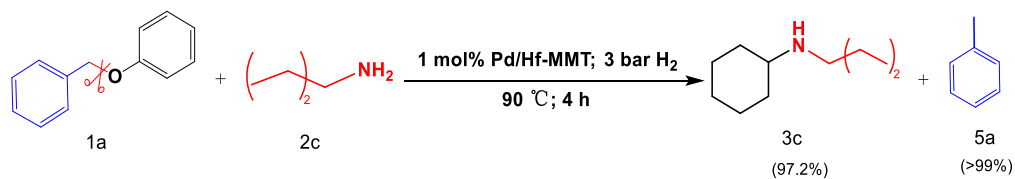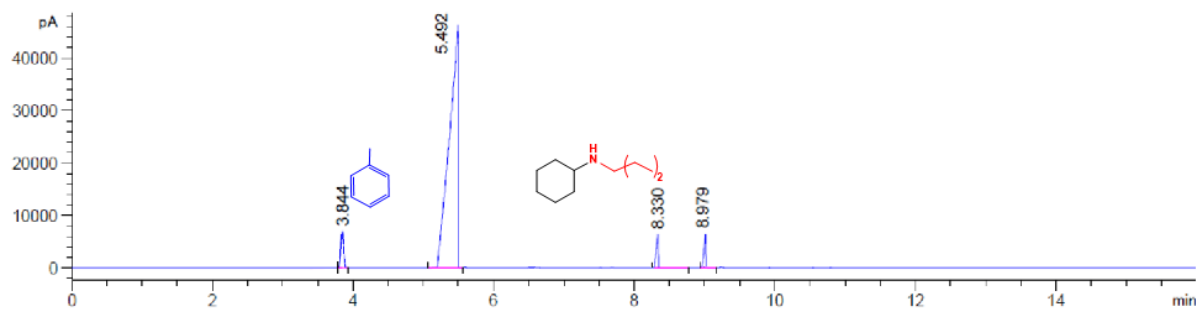

### Reaction 4

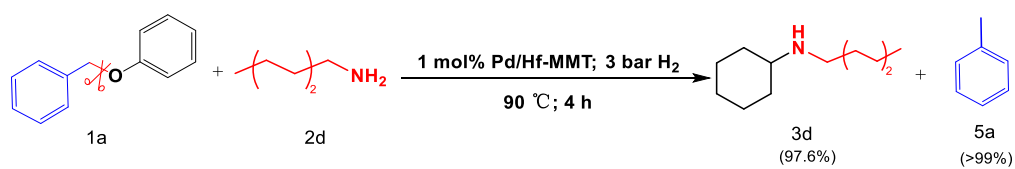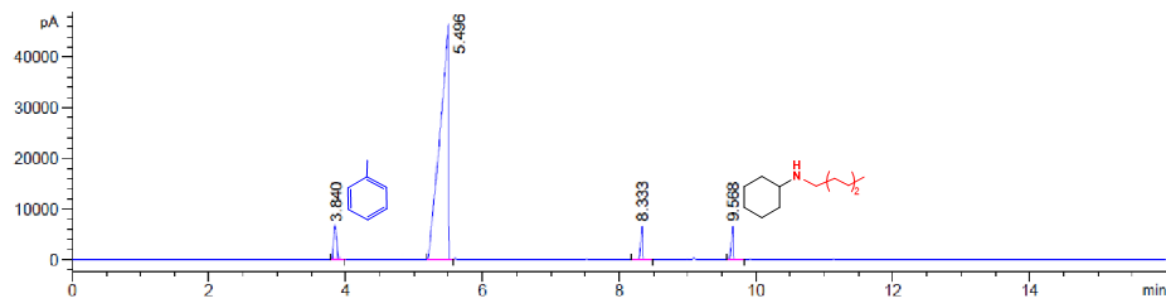

## Reaction 5

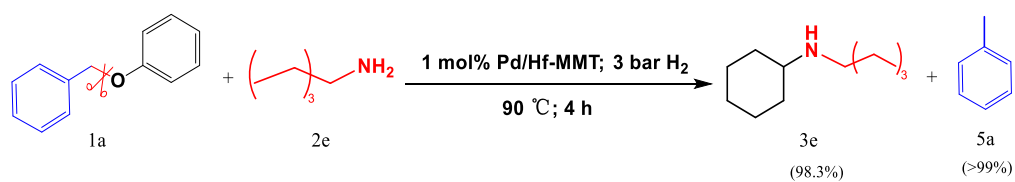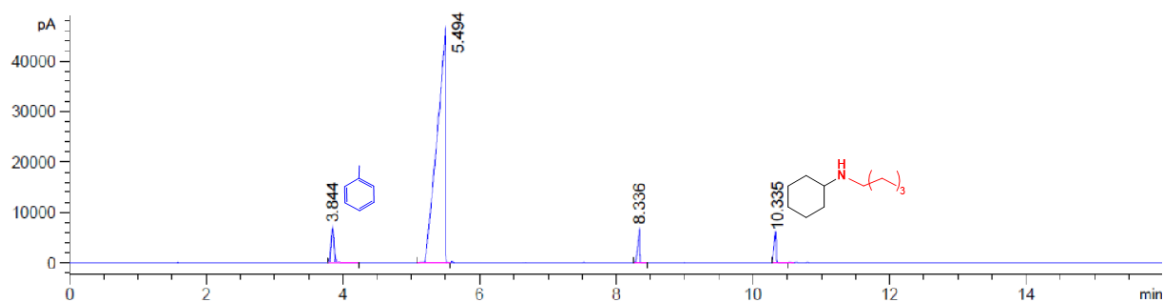

## Reaction 6

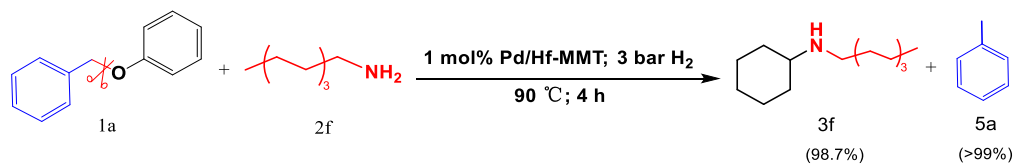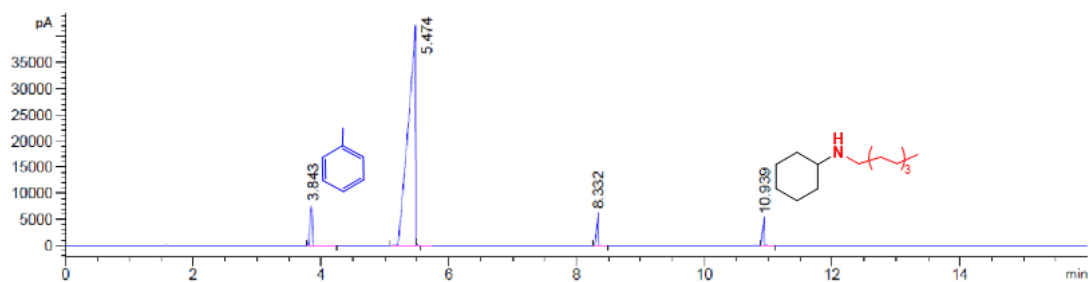

## Reaction 7

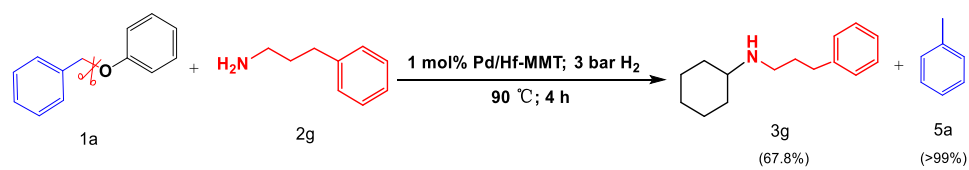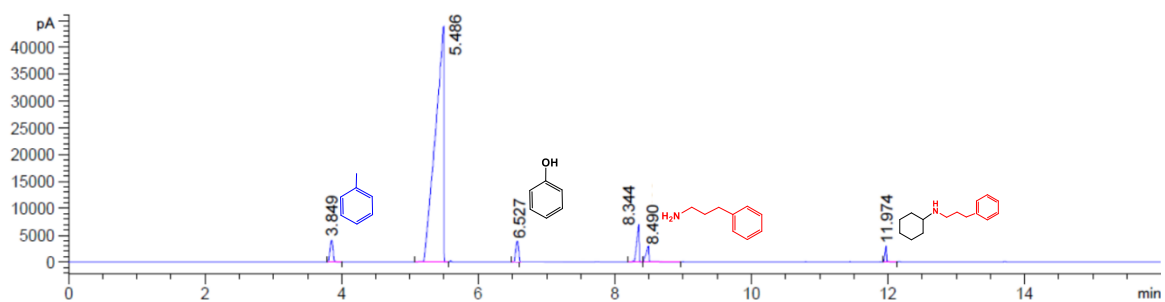

## Reaction 8

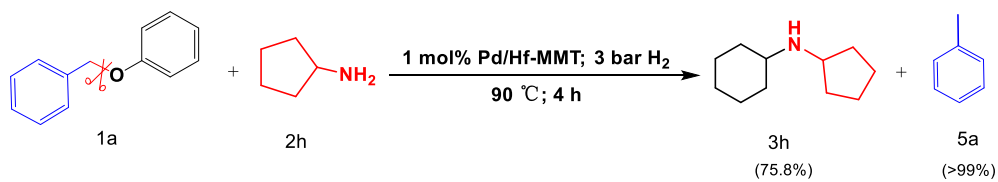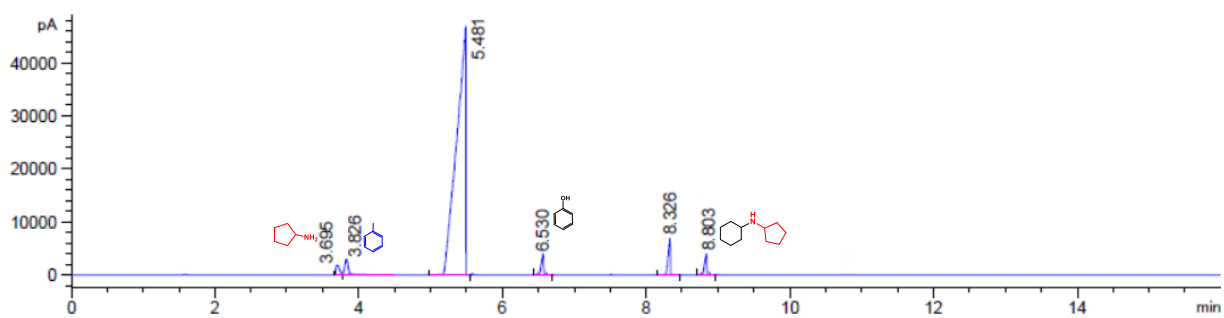

### Reaction 9

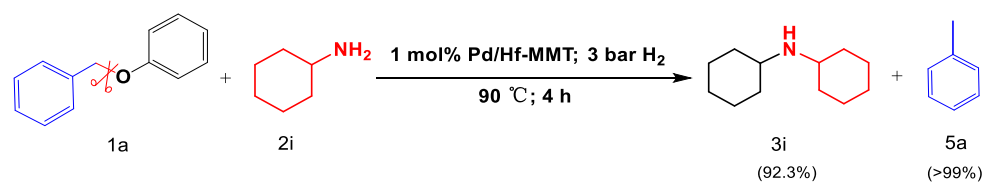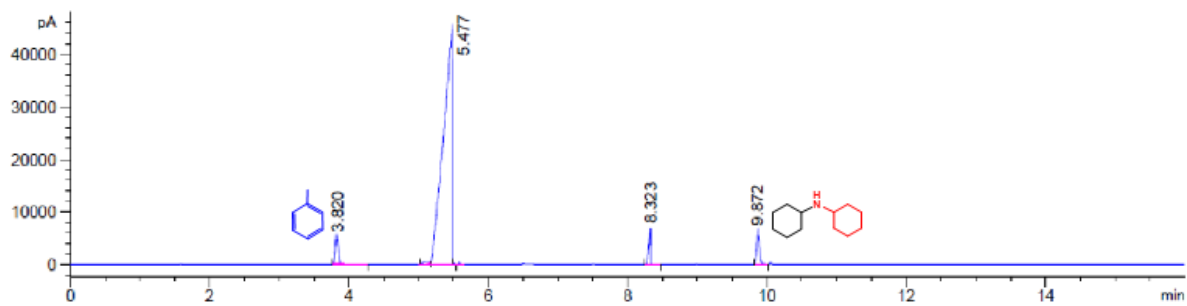

### Reaction 10

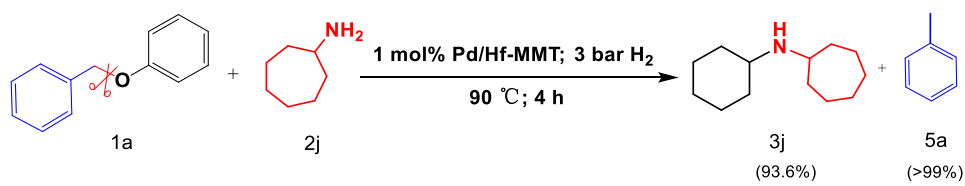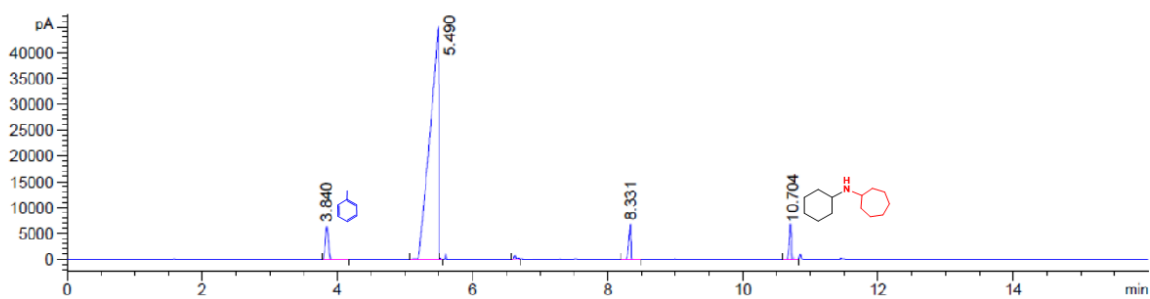

## Reaction 11

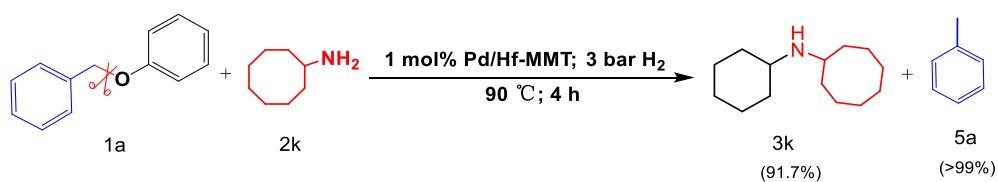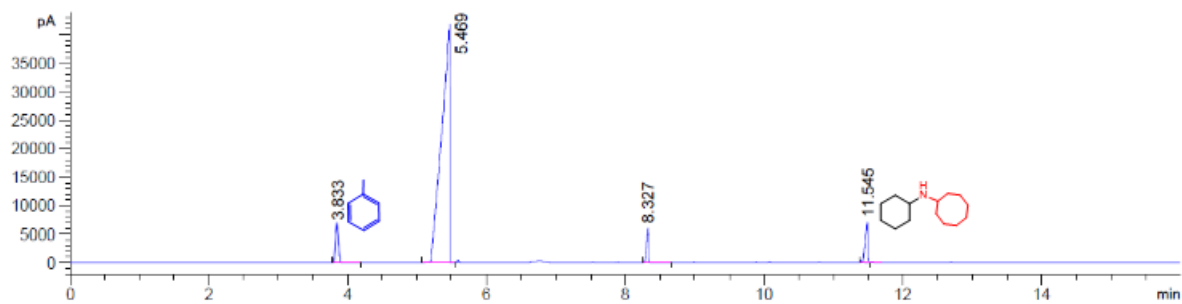

## Reaction 12

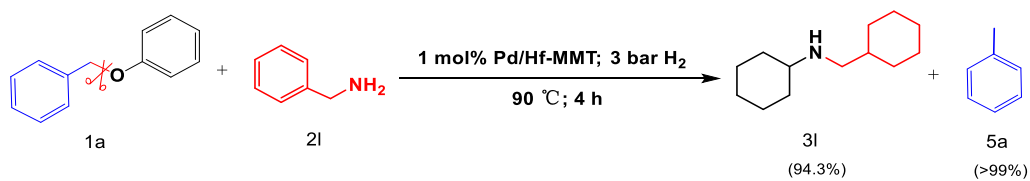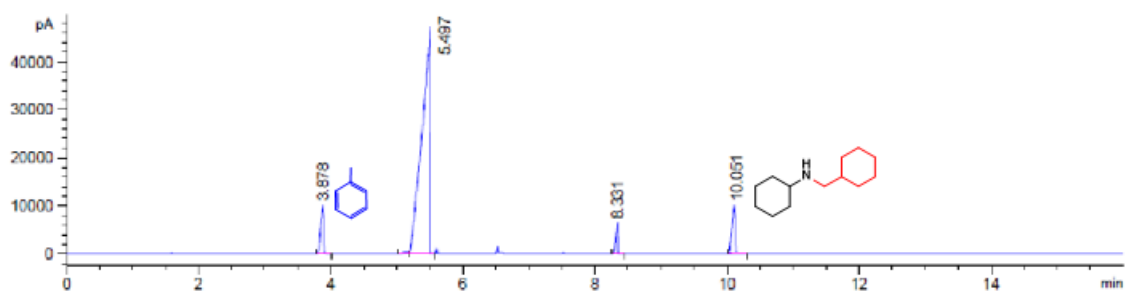

### Reaction 13

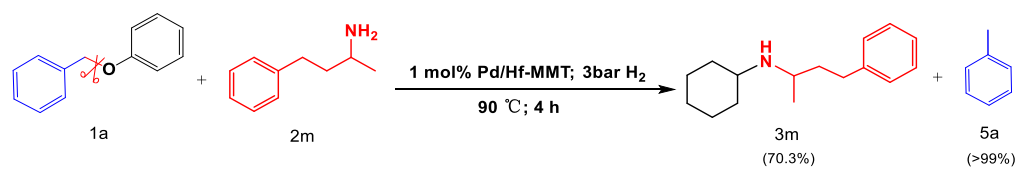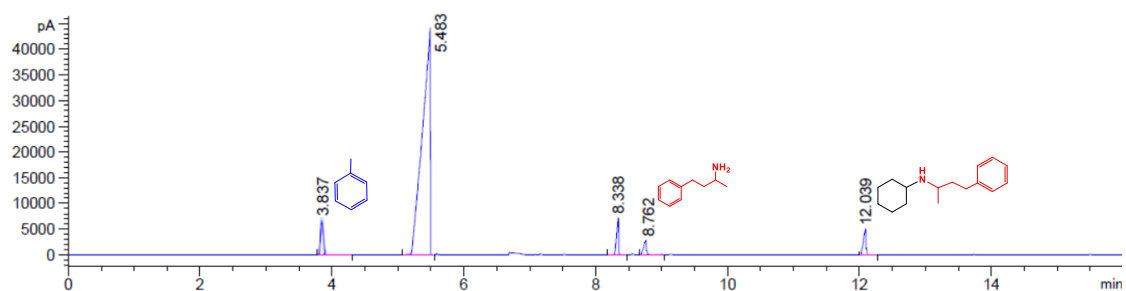

### Reaction 14

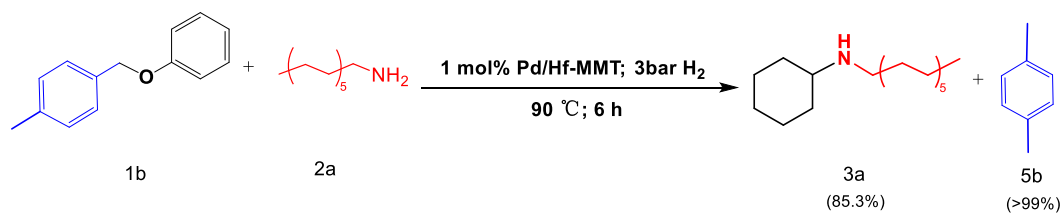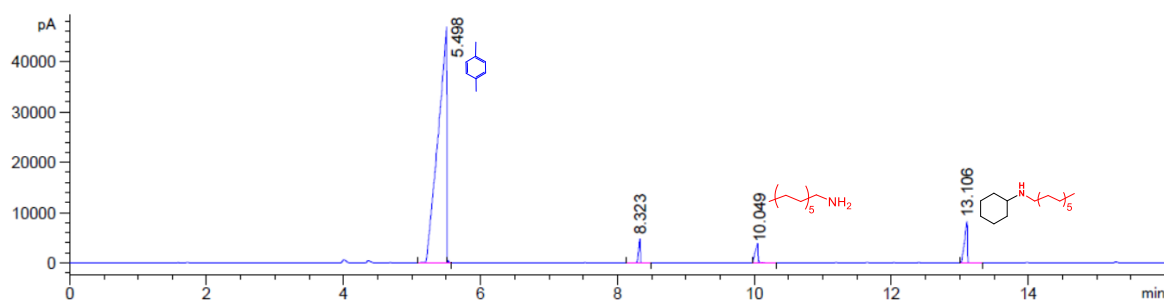

### Reaction 15

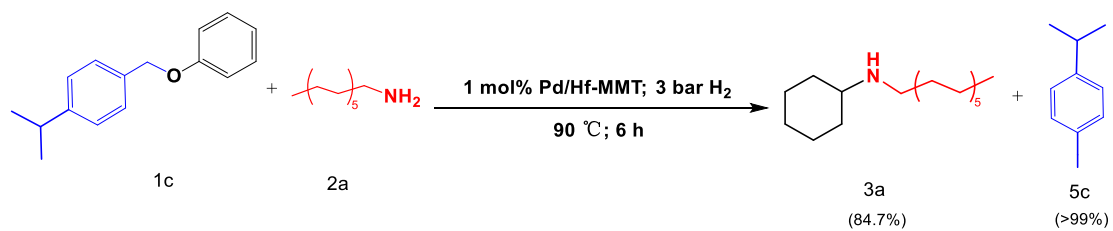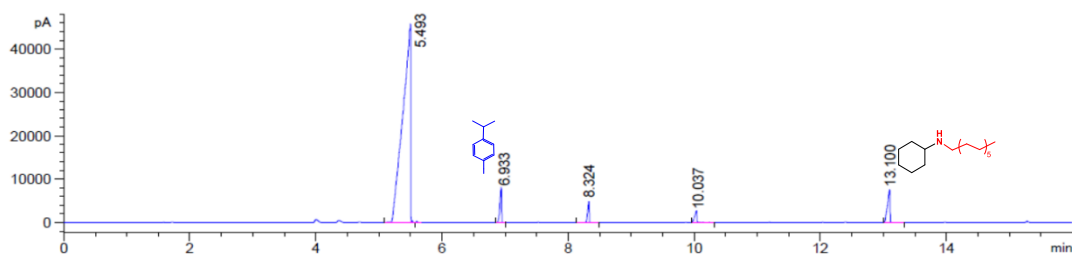

### Reaction 16

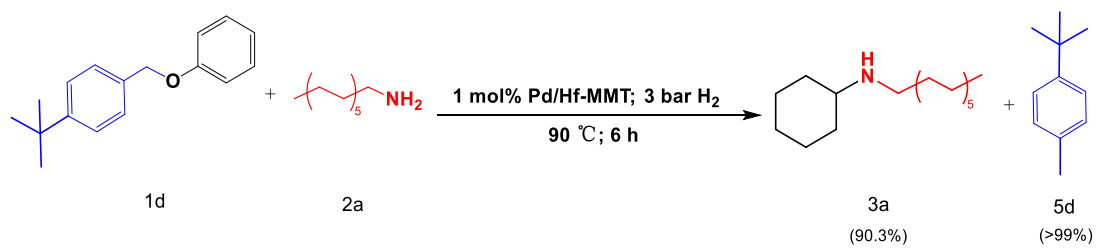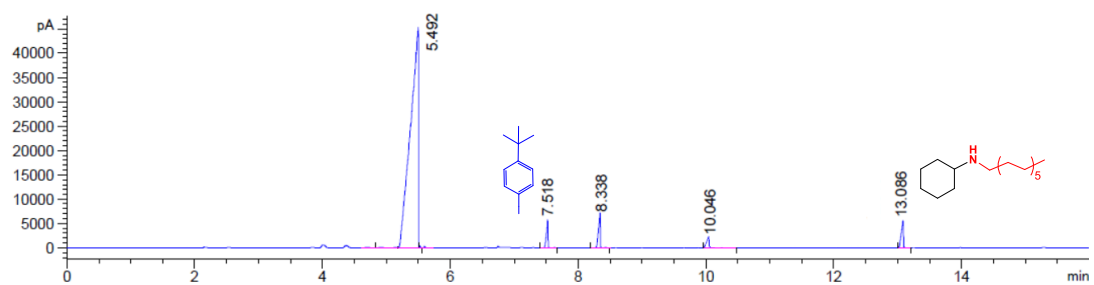

### Reaction 17

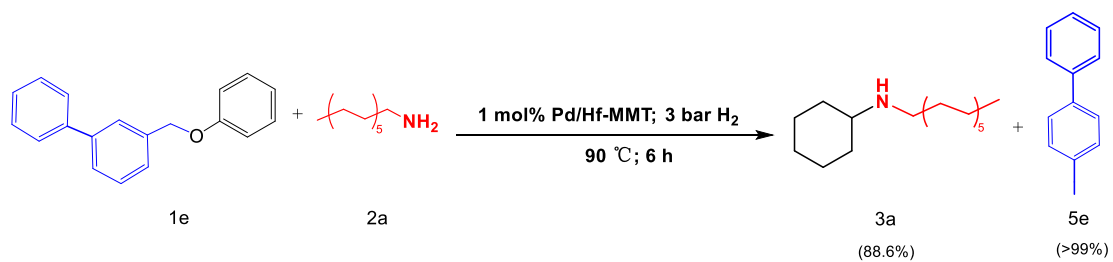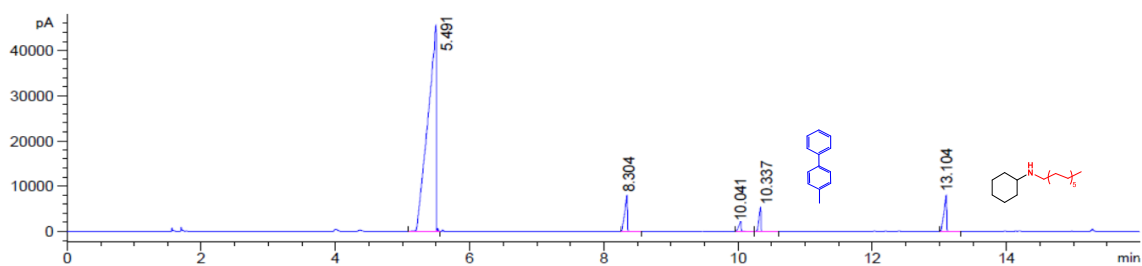

### Reaction 18

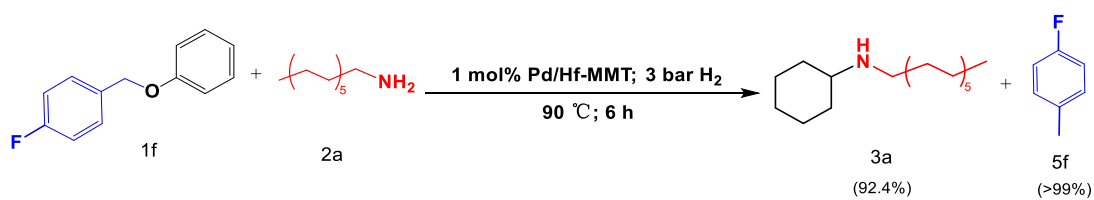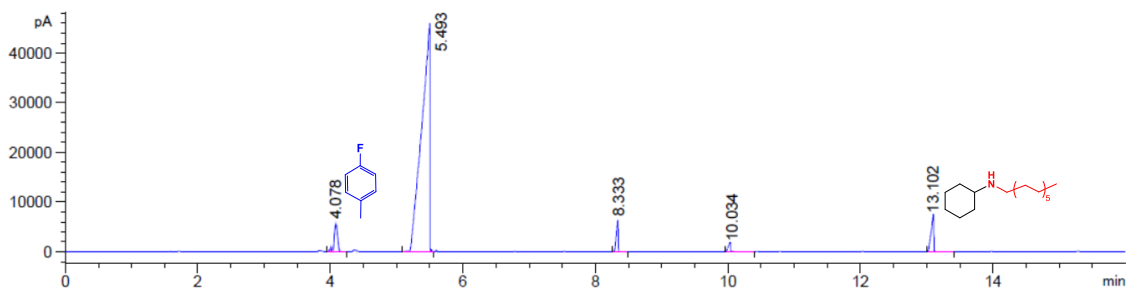



## Reaction 19

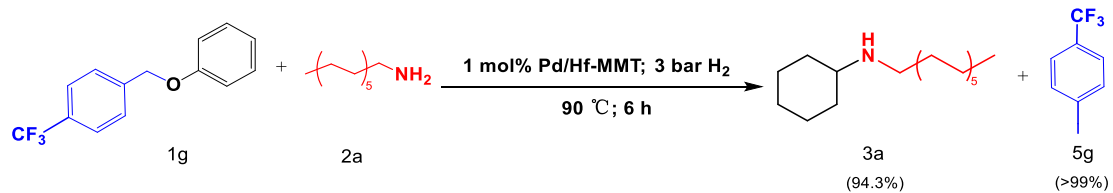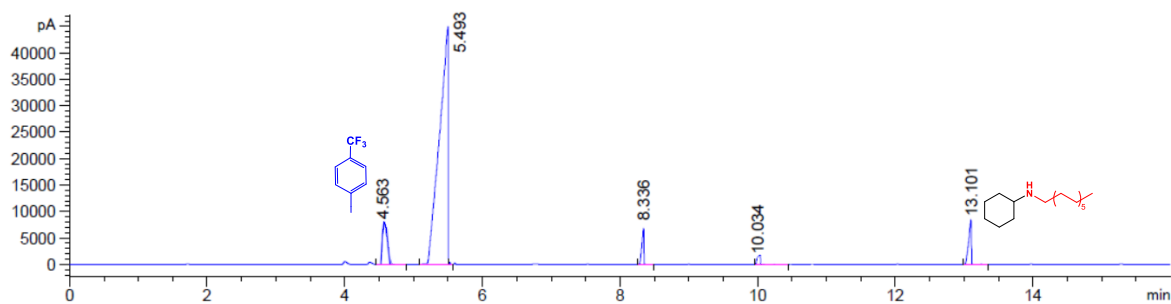

## Reaction 20

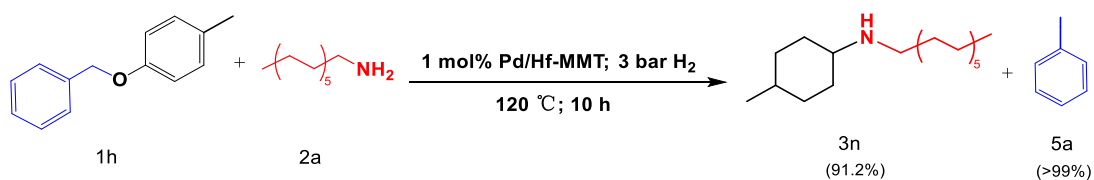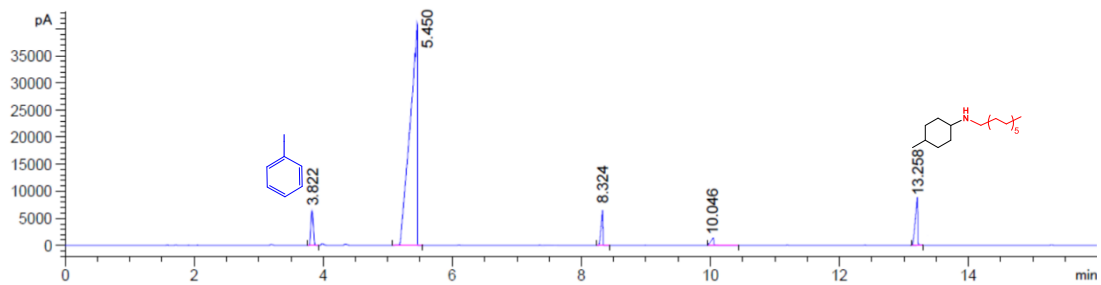

## Reaction 21

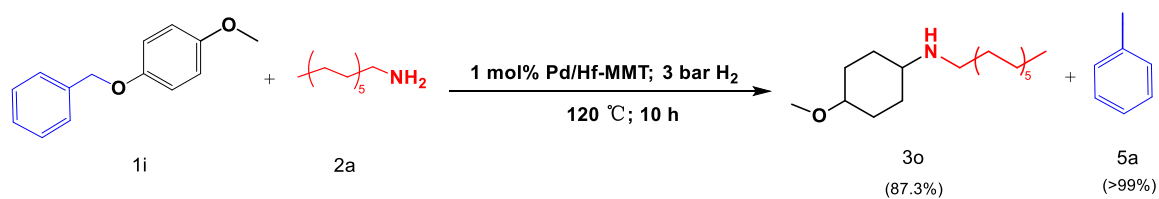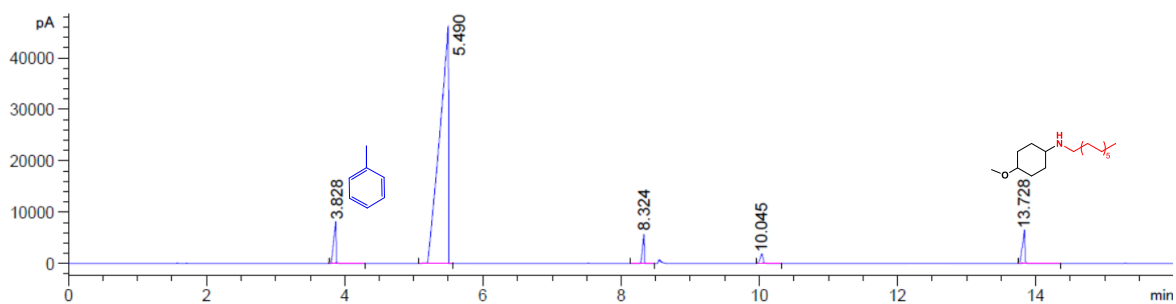

## Reaction 22

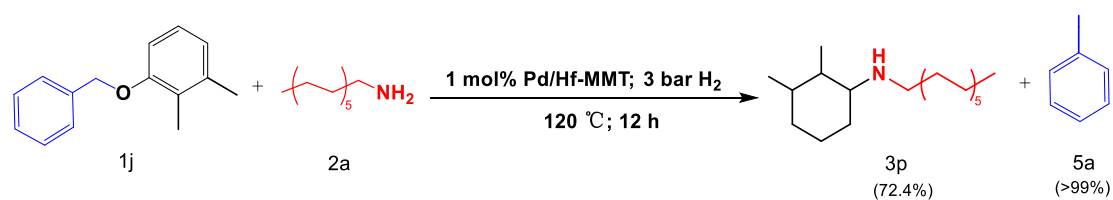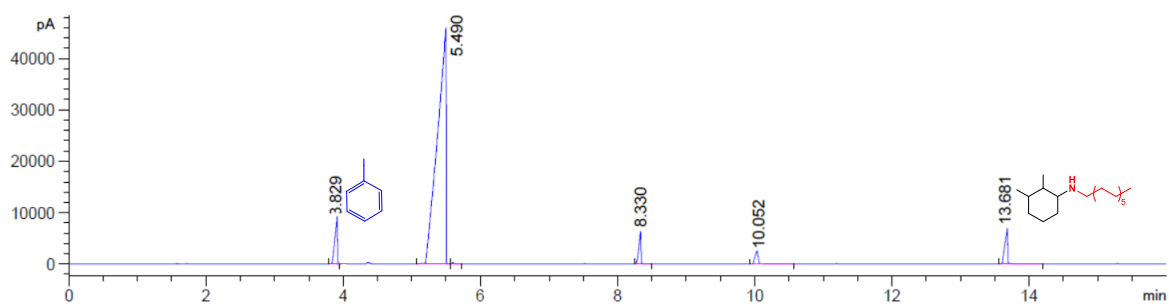

### Reaction 23

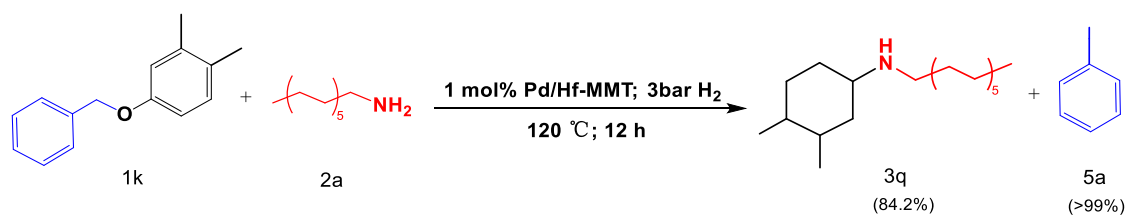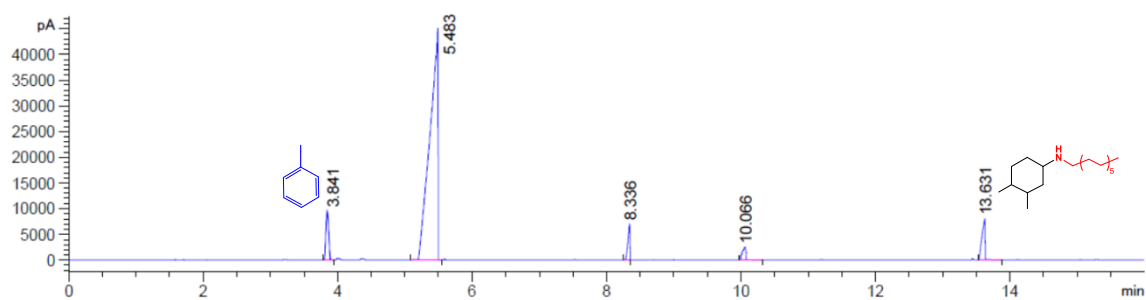

### Reaction 24

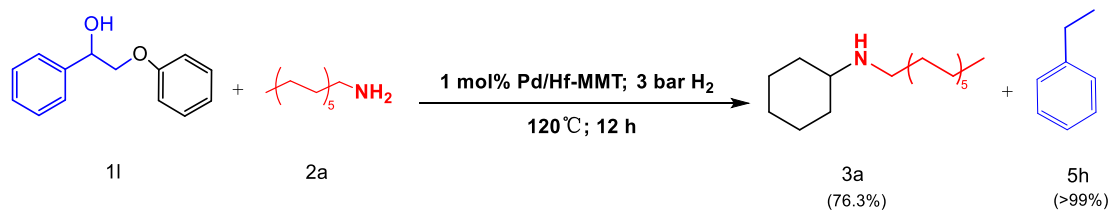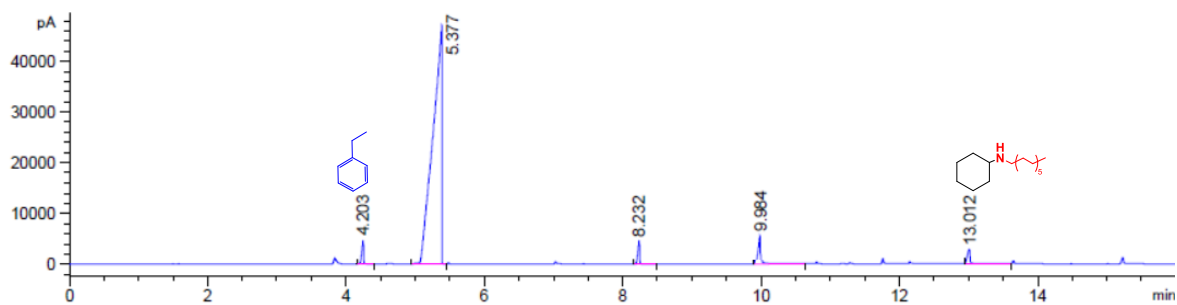

## Reaction 25

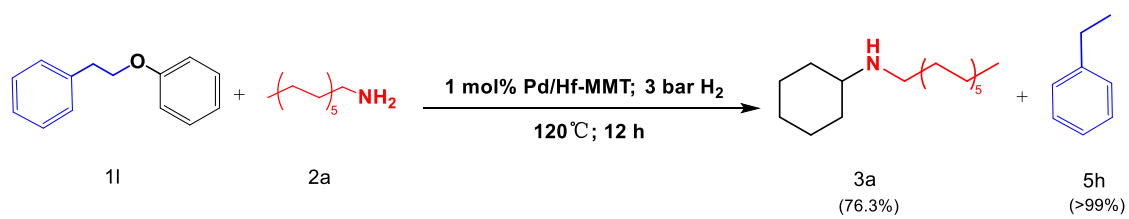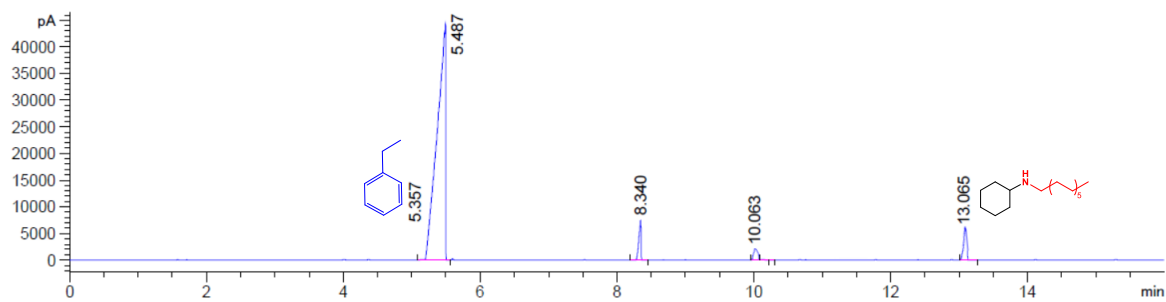

## References

- S1. T. Cuypers, T. Morias, S. Windels, C. Marquez, C. V. Goethem, I. Vankelecom and D. E. D. Vos, *Green Chem.*, 2020, **22**, 1884-1893.
- S2. W. B. Wu and J. M. Huang, *J. Org. Chem.*, 2014, **79**, 10189-10195.
